# Supplementary material for: Public knowledge, attitudes and practices related to antibiotic use and resistance in Singapore: a cross-sectional population survey
Source: PubMed Central journal article supplement — BMJ Open. 2021 Sep 13;11(9):e048157. doi: 10.1136/bmjopen-2020-048157 (PMC8438872; doi:10.1136/bmjopen-2020-048157), 2021-09-13
Supplement: bmjopen-2020-048157.draft_revisions.pdf [file bmjopen-2020-048157.draft_revisions.pdf]

# BMJ Open

BMJ Open is committed to open peer review. As part of this commitment we make the peer review history of every article we publish publicly available.

When an article is published we post the peer reviewers' comments and the authors' responses online. We also post the versions of the paper that were used during peer review. These are the versions that the peer review comments apply to.

The versions of the paper that follow are the versions that were submitted during the peer review process. They are not the versions of record or the final published versions. They should not be cited or distributed as the published version of this manuscript.

BMJ Open is an open access journal and the full, final, typeset and author-corrected version of record of the manuscript is available on our site with no access controls, subscription charges or pay-per-view fees (<http://bmjopen.bmj.com>).

If you have any questions on BMJ Open's open peer review process please email [info.bmjopen@bmj.com](mailto:info.bmjopen@bmj.com)

# BMJ Open

## A population survey of public knowledge, attitudes and practices related to antibiotic use and resistance in Singapore

|                               |                                                                                                                                                                                                                                                                                                                                                                                                                      |
|-------------------------------|----------------------------------------------------------------------------------------------------------------------------------------------------------------------------------------------------------------------------------------------------------------------------------------------------------------------------------------------------------------------------------------------------------------------|
| Journal:                      | <i>BMJ Open</i>                                                                                                                                                                                                                                                                                                                                                                                                      |
| Manuscript ID                 | bmjopen-2020-048157                                                                                                                                                                                                                                                                                                                                                                                                  |
| Article Type:                 | Original research                                                                                                                                                                                                                                                                                                                                                                                                    |
| Date Submitted by the Author: | 21-Dec-2020                                                                                                                                                                                                                                                                                                                                                                                                          |
| Complete List of Authors:     | Lim, Jane; National University Singapore Saw Swee Hock School of Public Health,<br>Cam, Duong Minh; National University Health System<br>Cook, Alex R ; National University Singapore Saw Swee Hock School of Public Health<br>Hsu, Li Yang; National University Singapore Saw Swee Hock School of Public Health<br>Tam, Clarence C; National University Health System; London School of Hygiene & Tropical Medicine |
| Keywords:                     | Public health < INFECTIOUS DISEASES, EPIDEMIOLOGY, EDUCATION & TRAINING (see Medical Education & Training)                                                                                                                                                                                                                                                                                                           |
|                               |                                                                                                                                                                                                                                                                                                                                                                                                                      |

SCHOLARONE™  
Manuscripts

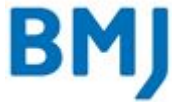

I, the Submitting Author has the right to grant and does grant on behalf of all authors of the Work (as defined in the below author licence), an exclusive licence and/or a non-exclusive licence for contributions from authors who are: i) UK Crown employees; ii) where BMJ has agreed a CC-BY licence shall apply, and/or iii) in accordance with the terms applicable for US Federal Government officers or employees acting as part of their official duties; on a worldwide, perpetual, irrevocable, royalty-free basis to BMJ Publishing Group Ltd ("BMJ") its licensees and where the relevant Journal is co-owned by BMJ to the co-owners of the Journal, to publish the Work in this journal and any other BMJ products and to exploit all rights, as set out in our [licence](#).

The Submitting Author accepts and understands that any supply made under these terms is made by BMJ to the Submitting Author unless you are acting as an employee on behalf of your employer or a postgraduate student of an affiliated institution which is paying any applicable article publishing charge ("APC") for Open Access articles. Where the Submitting Author wishes to make the Work available on an Open Access basis (and intends to pay the relevant APC), the terms of reuse of such Open Access shall be governed by a Creative Commons licence – details of these licences and which [Creative Commons](#) licence will apply to this Work are set out in our licence referred to above.

Other than as permitted in any relevant BMJ Author's Self Archiving Policies, I confirm this Work has not been accepted for publication elsewhere, is not being considered for publication elsewhere and does not duplicate material already published. I confirm all authors consent to publication of this Work and authorise the granting of this licence.

1  
2  
3 A population survey of public knowledge, attitudes and practices related to antibiotic use and  
4 resistance in Singapore  
5

6 Jane Mingjie LIM, Minh Cam DUONG<sup>a</sup>, Alex R COOK, Li Yang HSU<sup>a</sup>, Clarence C TAM<sup>a, b</sup>  
7

8  
9 <sup>a</sup> Saw Swee Hock School of Public Health, National University of Singapore and National University  
10 Health System, Singapore

11 <sup>b</sup> London School of Hygiene & Tropical Medicine, London, England, United Kingdom  
12  
13

14  
15 Word count: 2,663  
16

17 **\* Corresponding author:**

18 NUS Saw Swee Hock School of Public Health

19 National University Health System

20 12 Science Drive 2

21 Tahir Foundation Building

22 Singapore, 117549

23 Email: clarence.tam@nus.edu.sg  
24  
25  
26  
27  
28  
29  
30  
31  
32  
33  
34  
35  
36  
37  
38  
39  
40  
41  
42  
43  
44  
45  
46  
47  
48  
49  
50  
51  
52  
53  
54  
55  
56  
57  
58  
59  
60

## Abstract

### Background

The WHO's Global Action Plan on Antimicrobial Resistance includes increasing overall public awareness of appropriate antibiotic use and antimicrobial resistance as a key priority area. However, little is currently known about the drivers of antibiotic use in primary care and the general population. We aimed to measure public knowledge, attitudes and practices of antibiotics and antibiotic resistance in Singapore, providing baseline data against which to measure the progress of future interventions.

### Methods

Between May and June 2019, we conducted a survey via an online panel in Singapore with a total of 706 participants to measure public perceptions of antibiotics and antibiotic resistance as well as their healthcare seeking behaviours for the common cold and flu.

### Results

Our findings showed that while respondents indicated high levels of awareness of appropriate antibiotic use, there were common misconceptions surrounding antibiotic effectiveness and mechanisms of antibiotic resistance. In multivariable analyses, better knowledge about antibiotics and antibiotic resistance were associated with more favourable antibiotic attitudes. In addition, more favourable attitude scores were associated with lower odds of both expecting and being prescribed antibiotics by a primary care doctor.

### Conclusions

This study presents important information about population perceptions towards antibiotics and antibiotic resistance in Singapore. Results from this study emphasise the importance of effective public communication strategies to promote responsible antibiotic use locally and should be used to inform future implementation of programmes and activities as laid out in Singapore's National Strategic Action Plan on AMR.

Word count: 239

Keywords: antimicrobial resistance, antibiotic use, population survey,

### Strengths and limitations of this study

- This is the first population-level study on public knowledge, attitudes and practices of antibiotics and antibiotic resistance in Singapore. Findings from this study provide baseline information against which to measure the progress of future antibiotic interventions.
- Results from this study emphasise the importance of raising population awareness surrounding effective antibiotic use, as well as the mechanisms of antibiotic resistance. Further key resources beneficial to prescribers include standardised clinical practice guidelines, educational resources and diagnostic tools at points of care.
- A potential limitation of our study is that respondents in online surveys may not be fully representative of the general population. This may affect the generalisability of our results.

For peer review only

## Introduction

One of five key priority areas highlighted in the World Health Organization's Global Action Plan on Antimicrobial Resistance (AMR) is the improvement of overall public awareness of antibiotics and antimicrobial resistance to promote effective behavioural change population-level antibiotic use.<sup>1</sup> Research on the drivers of antibiotic use in several countries highlights widespread misconceptions among the public regarding appropriate use of antibiotics and the development of antibiotic resistance, showing that less antibiotic knowledge is often associated with unfavourable antibiotic use behaviours, such as self-medication with antibiotics or sharing leftover antibiotics with others.<sup>2</sup> These findings are supported by qualitative studies indicating that the general public is unfamiliar with technical terms such as "antimicrobial resistance", that they feel they "know" when they need antibiotics, and that antibiotic prescription is often viewed as a form of validation for their illness.<sup>3-5</sup>

Singapore is a high-income, city state in Asia with a comprehensive system of hybrid public and private primary, secondary and tertiary health care. Antibiotic resistance is an increasing concern not only in acute care hospitals<sup>6,7</sup> but also in the community<sup>8</sup>, an indicator of inappropriate antibiotic consumption. Although antibiotics can be obtained only via prescription by licensed healthcare professionals<sup>9</sup>, patients seeking primary health care for upper respiratory tract infections are commonly misinformed about the role of antibiotics in the treatment of viral infections and often seek primary care expecting antibiotics from a medical professional<sup>10</sup>.

The development of the WHO's Global Action Plan on AMR and subsequent national action plans<sup>11</sup> serves to complement existing strategies and to prioritise future AMR interventions in both healthcare institutions and the community in preserving antimicrobial effectiveness. To measure the progress of future interventions, as well as to yield evidence-based insights<sup>12</sup> into effective public communication strategies to promote responsible antibiotic use, we conducted an online population survey in Singapore to measure public perceptions of antibiotics and antibiotic resistance.

## Methods

### *Study design + data collection*

Survey respondents were participants in an online survey panel recruited and maintained by the Singapore Population Health Improvement Centre (SPHERiC) within the National University Health System. Members of the public are eligible to be part of the online survey panel if they are community-dwelling Singapore Citizens or Permanent Residents, aged 21 and above, English-literate, frequent users of web-based services and if they have a personal email account.

From 23 May to 1 June 2019, 1,001 SPHERiC panel members were invited to participate in the survey via an online link in an email or SMS notification. The survey was available to panel members for 10 days. A reminder notification was sent to panel members who did not respond to the first notification within five days. The self-completed survey was administered in English using RedCap software<sup>13</sup> and took approximately 10-15 minutes to complete. Participants received a reimbursement of SGD5 (~USD3.70) for completing the survey. Survey data were provided by SPHERiC to the research team in an anonymised form for analysis.

### *Survey questionnaire*

The questionnaire consisted of six sections, eliciting information from respondents about their sociodemographic characteristics (8 questions), knowledge about the effectiveness of antibiotics (5 questions), knowledge about the mechanisms of antibiotic resistance and the spread of antibiotic-resistant infections (12 questions), attitudes toward appropriate antibiotic use (9 questions),

1  
2  
3 antibiotic practices in relation to the last time they had an acute respiratory illness (11 questions), as  
4 well as their healthcare seeking behaviours (17 questions) (**Appendix A**).

5  
6  
7 The questionnaire was developed by reviewing available questionnaires from previously published  
8 surveys<sup>14,15</sup>. Additionally, to enhance cross-country comparability, questions about antibiotic  
9 resistance were taken from the WHO country survey<sup>16</sup>. To ensure that questions in the survey were  
10 well understood and adapted to the local context, the questionnaire was field tested with 29  
11 individuals over a period of six days.

#### 12 13 14 *Ethics approval*

15 This study was approved by the institutional review board of the National University of Singapore  
16 (reference number: B-16-269).

#### 17 18 19 *Data analysis*

20 We assessed representativeness of the survey sample by comparing respondents' sociodemographic  
21 characteristics with the Singapore Census of Population<sup>17</sup>. We then assessed respondents' general  
22 awareness toward antibiotics by tabulating variables related to antibiotic effectiveness, resistance  
23 and appropriate use. We also tabulated respondents' practices in relation to antibiotic use for common  
24 respiratory illnesses.

25  
26  
27 We assigned each respondent a knowledge and attitude score based on the number of correct or  
28 favorable responses in the respective sections (**Appendix B**). All knowledge and attitude questions  
29 had three response options: "Agree", "Disagree" or "Not sure". Correct knowledge and favourable  
30 attitude responses were assigned 1 point while incorrect or unfavourable responses scored 0 points.

31  
32  
33 Respondents' antibiotic practice responses during their last consultation with a primary care provider  
34 for acute respiratory illness were dichotomised into: 1) whether respondents expected antibiotics  
35 from their doctor (yes = 1; no = 0), 2) whether they asked their doctor for antibiotics (yes = 1; no = 0),  
36 and 3) whether they were prescribed antibiotics by their doctor (yes = 1; no = 0).

37  
38  
39 We first investigated the respective relationships between respondents' sociodemographic  
40 characteristics and their antibiotic knowledge and attitude scores using a multivariable linear  
41 (Gaussian) regression. Sociodemographic explanatory variables included age group, gender, housing  
42 type, household income, education, ethnicity and marital status.

43  
44  
45 In subsequent regression analyses, we investigated the association between antibiotic practices and  
46 antibiotic knowledge and attitudes scores using a multivariable linear (Gaussian) regression,  
47 controlling for sociodemographic variables. We then conducted separate multivariable logistic  
48 regressions to investigate whether respondents' attitudes scores were associated with each of the  
49 three antibiotic practices as outcome variables: 1) whether respondents expected antibiotics, 2)  
50 whether they asked for antibiotics and 3) whether they were prescribed antibiotics. We summarised  
51 associations using adjusted odds ratios and corresponding 95% confidence intervals (CI). Regression  
52 residual distributions can be found in **Appendix C**.

53  
54  
55 All data were analysed using R version 3.6.1.<sup>18</sup>

#### 56 57 **Results**

58 Of 1,001 eligible panel members, 706 (70.5%) completed the survey. Respondents had a median age  
59 of 44 years (range: 22 – 86 years). Four hundred (56.7%) respondents were female and 306 (43.3%)



1  
2  
3 were male. Most respondents were married (60.8%) and had higher than secondary education  
4 (78.0%). The survey sample had a similar gender and ethnic group composition compared to the  
5 Singapore Census of Population<sup>17</sup> but had slightly lower proportions of individuals who lived in  
6 private housing (i.e. condominium, landed property) and a higher proportion of individuals with a  
7 university education (**Table 1**).  
8  
9

### 10 *Descriptive analysis*

11 Tabulations and frequencies of the descriptive analysis are shown in **Table 2**.  
12  
13

#### 14 Awareness of antibiotic effectiveness

15  
16 Almost all the respondents (97.5%) had heard of the term “antibiotics” before. When asked if  
17 antibiotics were effective against bacterial infections and viral infections, only about a third of the  
18 respondents (35.6%) answered both questions correctly. A large proportion of respondents believed  
19 that antibiotics could help to speed up recovery from the common respiratory illness (35.4%), or  
20 alleviate serious symptoms associated with these illnesses (45.2%).  
21  
22

#### 23 Awareness of antibiotic resistance

24  
25 Among respondents, 60.5% reported having heard of the term “antibiotic resistance”, but only 11%  
26 had heard of the abbreviation “AMR”. About half of the respondents were aware that resistance occurs  
27 when bacteria become resistant to the antibiotics. However, many respondents also thought that  
28 resistance occurs when our bodies become resistant to antibiotics (62.5%) or when antibiotics  
29 become less powerful (48.5%).  
30  
31

32  
33 There was also lower awareness among respondents about how antibiotic-resistant infections could  
34 spread or affect common conditions. More than half (56.1%) either disagreed or were not sure that  
35 antibiotic resistance can affect the treatment of common infections such as sore throat and urinary  
36 tract infection. More than a third of respondents (39.7%) believed that their own use of antibiotics  
37 does not have any impact on other people’s chances of acquiring antibiotic-resistant infections, and  
38 that they do not have to worry about getting antibiotic-resistant infections as long as they use  
39 antibiotics appropriately themselves (44.5%). Overall, respondents agreed that interventions to  
40 reduce AMR include implementing better infection control measures in hospitals (76.2%) and using  
41 fewer antibiotics (71.9%), although a lower percentage recognized hand hygiene (61.7%) and  
42 vaccination (59.5%) as important interventions.  
43  
44

#### 45 Awareness on how to use antibiotics responsibly

46  
47  
48 There was generally high awareness about appropriate practices in sharing antibiotics – respondents  
49 generally agreed that it is inappropriate to share antibiotics with family and friends when they are  
50 sick with either same (84.3%) or different (92.4%) symptoms. Respondents were also reluctant to  
51 share antibiotics with their household pets – only 1% thought it was appropriate to do so.  
52  
53

54  
55 Less than 10% of the respondents said that they felt comfortable keeping leftover antibiotics for future  
56 use. While over 90% of the respondents agreed that it is important to always finish the course of  
57 antibiotics prescribed, a small proportion of respondents believed that they do not have to finish a  
58 prescribed course of antibiotics when they feel better (7.9%) or when they have an alternative remedy  
59 (8.2%).  
60

### Cold/flu practices

We asked respondents what they did the last time they had symptoms of the common cold or flu (**Figure 1**). Of the 706 respondents, 50.6% chose to see a doctor. The rest chose to take extra rest (29.7%), over-the-counter medication (20.1%), traditional Chinese medicine (6.2%) or do nothing about the symptoms (6.4%). Only 1.4% of respondents used leftover antibiotics (1.4%).

Of the 350 respondents who chose to see a doctor for their cold and flu symptoms, 12.6% expected an antibiotic prescription and 11.4% explicitly asked their doctor for antibiotics. Despite this, nearly half (49.7%) of the respondents who visited the doctor for cold or flu symptoms reported that their doctor prescribed them antibiotics, regardless of whether they asked for them explicitly or not.

For respondents who were prescribed antibiotics, 71.1% said that the doctor explained to them why they needed antibiotics, but only a minority stated that their doctor talked to them about possible side-effects of antibiotics (28.3%), or about antibiotic resistance (18.1%). For respondents who were not prescribed antibiotics, 44.6% of them said that the doctor explained why they did not need them.

### *Multivariable analysis*

#### Respondents' knowledge & attitude scores

Respondents' median knowledge score was 8 (range: 0 – 14) and median attitude score was 7 (range 0 – 11).

Compared to female respondents, males scored better in terms of antibiotic knowledge ( $\beta$ : 0.68; 95% CI - 0.15 – 1.22) but scored worse for attitudes ( $\beta$ : -0.40; 95% CI: -0.77 – -0.03). Malays had lower knowledge ( $\beta$ : -0.69; 95% CI: -1.81 – -0.43) and attitude scores ( $\beta$ : -1.04; 95% CI: -1.76 – -0.33) relative to their Chinese counterparts. Respondents with secondary education also scored lower for both knowledge ( $\beta$ : -1.64; 95% CI: -2.53 – -0.75) and attitudes ( $\beta$ : -1.16; 95% CI: -1.71 – -0.60) compared to respondents with a university education. Respondents in 3 room HDB (public housing) flat scored lower for both knowledge ( $\beta$ : -1.01; 95% CI: -1.90 – -0.13) and attitudes ( $\beta$ : -0.83; 95% CI: -1.42 – -0.24) compared to respondents in 5-room HDB and executive flats (**Table 3**).

Attitude scores increased by 0.29 (95% CI: 0.20 – 0.37) for every unit increase in antibiotic knowledge score (**Table 4**).

#### Respondents' knowledge & attitude scores with practice variables

We found that more favourable antibiotic attitude scores were associated with lower odds of expecting antibiotics (OR: 0.84, 95% CI: 0.72 – 0.99) per unit increase in score. Antibiotic knowledge and attitude scores were not associated with whether participants asked their doctors for antibiotics. However, higher scores on knowledge of antibiotic resistance (OR: 0.90, 95% CI: 0.79 – 1.05) and attitude (OR: 0.76, 95% CI: 0.63 – 0.90) were associated with lower odds of being prescribed antibiotics by the doctor (**Table 4**).

### **Discussion**

Our cross-sectional study of 706 participants in Singapore showed that there is a high level of awareness towards appropriate antibiotic use among the Singapore general population, but greater knowledge and awareness can be beneficial for curbing expectation and receipt of antibiotics during primary care consultations.

1  
2  
3 While most of the respondents said that they had heard of the term antibiotics before, only about a  
4 third of the respondents could correctly identify that antibiotics are effective towards bacterial and  
5 not viral infections. Comparable to previously published surveys in other countries<sup>15,19,20</sup>, almost half  
6 of the respondents believed that antibiotics could be used for speeding up recovery or alleviating  
7 symptoms from conditions like the common cold and the flu, indicating knowledge gaps in the  
8 appropriate use of antibiotics.  
9

10  
11 In terms of awareness of antibiotic resistance, only about a tenth of the respondents were able to  
12 correctly identify the mechanisms of resistance, suggesting a need for increased public education in  
13 this area. These misconceptions are also mirrored in the WHO multi-country antibiotic resistance  
14 public awareness survey in 12 countries.<sup>16</sup> Similar to our findings, a majority of respondents in all  
15 countries surveyed thought that antibiotic resistance occurs when our bodies become resistant to  
16 antibiotics, while approximately half of the respondents thought that antibiotic resistance is only a  
17 problem for people who take antibiotics regularly.  
18  
19

20  
21 Approximately half of the respondents went to a medical doctor when they experienced symptoms of  
22 the cold or flu, and a tenth of these respondents expressed that they explicitly asked for antibiotics.  
23 These results are congruent with a previously published study on Singaporean adult patients seeking  
24 medical care for upper respiratory tract infection symptoms, where a third of patients said that they  
25 would ask the doctor for antibiotics or see another doctor if antibiotics were not prescribed<sup>10</sup>. While  
26 the studies looked at different target populations, this could indicate favourable population-level  
27 changes in antibiotic seeking behaviours over time.  
28  
29

30  
31 While only a small proportion of respondents who sought care for their symptoms of the cold or flu  
32 said that they expected antibiotics, close to half of them left the clinic with antibiotics whether they  
33 asked for them or not. While respondents with higher attitude scores were less likely to expect  
34 antibiotics and to leave the clinic with an antibiotic prescription, this discrepancy between patient  
35 expectation and prescription is an indication of sub-optimal antibiotic prescribing. As respondents'  
36 antibiotic prescribing information was self-reported, we were unable to verify whether they actually  
37 received antibiotics, or if those who knew more about antibiotics were less likely to take any form of  
38 prescription. We also do not know from our study if there are significant differences in patient  
39 antibiotic seeking behaviours or clinician prescribing practices between public and private healthcare  
40 sectors. However, previous research in other countries indicates the effectiveness of potential  
41 strategies such as delayed prescription<sup>21,22</sup> and shared decision-making<sup>23,24</sup> to reduce inappropriate  
42 antibiotic use especially for acute respiratory infections.  
43  
44

45  
46 These findings also highlight the importance of disseminating clear information about antibiotics and  
47 antibiotic resistance not only to the public, but also providing resources such as clinical practice  
48 guidelines<sup>25</sup> on antibiotic use in acute upper respiratory infections and diagnostic tools in upskilling  
49 primary care healthcare professionals. Further, while public campaign messages have focused on  
50 antibiotic effectiveness towards specific medical conditions, our findings suggest that more should be  
51 done with regard to how people can use antibiotics more effectively and how health professionals can  
52 communicate that information. Future research should further explore where people usually get  
53 information about antibiotics and how this influences their antibiotic seeking behaviours.  
54  
55

56  
57 A potential limitation of our study is that respondents in online surveys may not be fully  
58 representative of the general population. Although our survey sample was compared to the Singapore  
59 census population in terms of gender and ethnic group, there was a pronounced over-representation  
60 of respondents with at least a university education and those living in private accommodation. This

1  
2  
3 may affect the generalisability of our results as these sociodemographic characteristics might be  
4 associated with greater awareness about health-related issues as well as knowledge relating to AMR.  
5  
6

### 7 **Conclusion**

8 This is the first study on public knowledge, attitudes and practices of antibiotics and antibiotic  
9 resistance in Singapore, providing baseline information against which to measure the progress of  
10 future interventions. Results from this study serve to emphasise the importance of raising awareness  
11 surrounding effective antibiotic use, as well as the mechanisms of antibiotic resistance. They also  
12 highlight the benefit of clinical practice guidelines on antibiotic prescribing, educational resources and  
13 clinical diagnostic tools for providers. These recommendations should be used to inform future  
14 implementation of programmes and activities as laid out in Singapore's National Strategic Action Plan  
15 on Antimicrobial Resistance.  
16  
17

### 18 **Funding**

19 This work was funded by the Singapore Ministry of Health's National Medical Research Council under  
20 the Centre Grant Programme – Singapore Population Health Improvement Centre  
21 (NMRC/CG/C026/2017\_NUHS).  
22  
23

### 24 **Acknowledgements**

25 We thank the SPHS unit for their assistance in pre-testing and data management for the questionnaire  
26 fielded to the online panel.  
27  
28

### 29 **Authors' contributions**

30 All authors attest they meet the ICMJE criteria for authorship. JL, DMC and CCT conceived the research  
31 study and developed the questionnaire. JL and CCT analysed the data and drafted the manuscript. All  
32 authors provided critical feedback on the manuscript.  
33  
34

### 35 **Availability of data and materials**

36 All data generated or analysed during this study are included in this published article and its  
37 supplementary information files.  
38  
39

### 40 **Competing interests**

41 The authors declare that they have no competing interests.  
42  
43

### 44 **Patient and public involvement**

45 Patients or the public were not involved in the design, or conduct, or reporting, or dissemination plans  
46 of our research  
47  
48

### 49 **License statement**

50 I, the Submitting Author has the right to grant and does grant on behalf of all authors of the Work (as  
51 defined in the below author licence), an exclusive licence and/or a non-exclusive licence for  
52 contributions from authors who are: i) UK Crown employees; ii) where BMJ has agreed a CC-BY licence  
53 shall apply, and/or iii) in accordance with the terms applicable for US Federal Government officers or  
54 employees acting as part of their official duties; on a worldwide, perpetual, irrevocable, royalty-free  
55 basis to BMJ Publishing Group Ltd ("BMJ") its licensees and where the relevant Journal is co-owned  
56 by BMJ to the co-owners of the Journal, to publish the Work in BMJ Open and any other BMJ products  
57 and to exploit all rights, as set out in our licence.  
58  
59  
60

1  
2  
3 The Submitting Author accepts and understands that any supply made under these terms is made by  
4 BMJ to the Submitting Author unless you are acting as an employee on behalf of your employer or a  
5 postgraduate student of an affiliated institution which is paying any applicable article publishing  
6 charge ("APC") for Open Access articles. Where the Submitting Author wishes to make the Work  
7 available on an Open Access basis (and intends to pay the relevant APC), the terms of reuse of such  
8 Open Access shall be governed by a Creative Commons licence – details of these licences and  
9 which Creative Commons licence will apply to this Work are set out in our licence referred to above.  
10  
11

12  
13 **Figure caption**

14 Figure 1. Participants' cold/flu practices  
15  
16  
17  
18  
19  
20  
21  
22  
23  
24  
25  
26  
27  
28  
29  
30  
31  
32  
33  
34  
35  
36  
37  
38  
39  
40  
41  
42  
43  
44  
45  
46  
47  
48  
49  
50  
51  
52  
53  
54  
55  
56  
57  
58  
59  
60

For peer review only

## References

- 1 World Health Organization. Global action plan on antimicrobial resistance. 2015. <https://apps.who.int/iris/handle/10665/193736>.
- 2 Jamhour A, El-Kheir A, Salameh P, Abi Hanna P, Mansour H. Antibiotic knowledge and self-medication practices in a developing country: A cross-sectional study. *American journal of infection control* 2017; **45**: 384–8.
- 3 Gaarslev C, Yee M, Chan G, Fletcher-Lartey S, Khan R. A mixed methods study to understand patient expectations for antibiotics for an upper respiratory tract infection. *Antimicrobial Resistance & Infection Control* 2016; **5**: 39.
- 4 Davis ME, Liu T-L, Taylor YJ, *et al*. Exploring patient awareness and perceptions of the appropriate use of antibiotics: a mixed-methods study. *Antibiotics* 2017; **6**: 23.
- 5 Torres NF, Solomon VP, Middleton LE. Patterns of self-medication with antibiotics in Maputo City: a qualitative study. *Antimicrobial Resistance & Infection Control* 2019; **8**: 161.
- 6 Hsu L-Y, Tan T-Y, Jureen R, *et al*. Antimicrobial drug resistance in Singapore hospitals. *Emerging infectious diseases* 2007; **13**: 1944.
- 7 Cai Y, Venkatachalam I, Tee NW, *et al*. Prevalence of healthcare-associated infections and antimicrobial use among adult inpatients in Singapore acute-care hospitals: results from the first national point prevalence survey. *Clinical Infectious Diseases* 2017; **64**: S61–7.
- 8 Shankar N, Chow ALP, Oon J, *et al*. The epidemiology and transmission of methicillin-resistant *Staphylococcus aureus* in the community in Singapore: study protocol for a longitudinal household study. *BMC infectious diseases* 2017; **17**: 678.
- 9 Health Products (Therapeutic Products) Regulations 2016. <https://sso.agc.gov.sg/SL/HPA2007-S329-2016> (accessed Sept 15, 2020).
- 10 Pan DST, Huang JH, Lee MHM, *et al*. Knowledge, attitudes and practices towards antibiotic use in upper respiratory tract infections among patients seeking primary health care in Singapore. *BMC family practice* 2016; **17**: 148.
- 11 National Strategic Action Plan on Antimicrobial Resistance, Singapore. 2017.
- 12 Huttner B, Saam M, Moja L, *et al*. How to improve antibiotic awareness campaigns: findings of a WHO global survey. *BMJ global health* 2019; **4**: e001239.
- 13 Harris PA, Taylor R, Minor BL, *et al*. The REDCap consortium: Building an international community of software platform partners. *Journal of biomedical informatics* 2019; **95**: 103208.
- 14 André M, Vernby Å, Berg J, Lundborg CS. A survey of public knowledge and awareness related to antibiotic use and resistance in Sweden. *Journal of Antimicrobial chemotherapy* 2010; **65**: 1292–6.
- 15 You JHS, Yau B, Choi KC, Chau CTS, Huang QR, Lee SS. Public knowledge, attitudes and behavior on antibiotic use: a telephone survey in Hong Kong. *Infection* 2008; **36**: 153–7.



- 1  
2  
3 16 Resistance WA. Multi-country public awareness survey. *World Health Organization: Geneva, Switzerland* 2015; : 59.  
4  
5  
6  
7 17 Statistics D of. Singapore Census of Population 2010: Statistical Release 1: Demographic  
8 Characteristics, education, language and religion. Singapore Government, 2011.  
9  
10 18 RStudio Team. RStudio: Integrated Development for R. Boston, MA: RStudio, Inc., 2015  
11 <http://www.rstudio.com/>.  
12  
13 19 Chan GC, Tang SF. Parental knowledge, attitudes and antibiotic use for acute upper respiratory tract  
14 infection in children attending a primary healthcare clinic in Malaysia. *Malaysian Family Physician*  
15 2012; **2**: 5.  
16  
17 20 Chanvatik S, Kosiyaporn H, Lekagul A, *et al*. Knowledge and use of antibiotics in Thailand: A 2017  
18 national household survey. *PloS one* 2019; **14**: e0220990.  
19  
20 21 Little P, Moore M, Kelly J, *et al*. Delayed antibiotic prescribing strategies for respiratory tract  
22 infections in primary care: pragmatic, factorial, randomised controlled trial. *Bmj* 2014; **348**: g1606.  
23  
24 22 Spurling GK, Del Mar CB, Dooley L, Foxlee R, Farley R. Delayed antibiotic prescriptions for  
25 respiratory infections. *Cochrane Database of Systematic Reviews* 2017.  
26  
27 23 Coxeter P, Del Mar CB, McGregor L, Beller EM, Hoffmann TC. Interventions to facilitate shared  
28 decision making to address antibiotic use for acute respiratory infections in primary care. *Cochrane*  
29 *Database of Systematic Reviews* 2015.  
30  
31 24 Légaré F, Labrecque M, Cauchon M, Castel J, Turcotte S, Grimshaw J. Training family physicians in  
32 shared decision-making to reduce the overuse of antibiotics in acute respiratory infections: a  
33 cluster randomized trial. *Cmaj* 2012; **184**: E726–34.  
34  
35 25 Lee T-H, Wong JG, Lye DC, *et al*. Medical and psychosocial factors associated with antibiotic  
36 prescribing in primary care: survey questionnaire and factor analysis. *British Journal of General*  
37 *Practice* 2017; **67**: e168–77.  
38  
39  
40  
41  
42  
43  
44  
45  
46  
47  
48  
49  
50  
51  
52  
53  
54  
55  
56  
57  
58  
59  
60

**Table 1** Demographic and socioeconomic characteristics of survey participants compared with Singapore Census of Population (2010)

|                                      | <b>Survey respondents<br/>n (%)</b> | <b>Census (2010)<br/>(%)</b> |
|--------------------------------------|-------------------------------------|------------------------------|
| <b>Gender*</b>                       |                                     |                              |
| Male                                 | 306 (43.3)                          | 49.3                         |
| Female                               | 400 (56.7)                          | 50.7                         |
| <b>Age</b>                           |                                     |                              |
| Median age                           | 44                                  | 37.4                         |
| <b>Ethnicity</b>                     |                                     |                              |
| Chinese                              | 549 (77.8)                          | 74.1                         |
| Malay                                | 82 (11.6)                           | 13.4                         |
| Indian                               | 51 (7.2)                            | 9.2                          |
| Other                                | 24 (3.4)                            | 3.3                          |
| <b>Education</b>                     |                                     |                              |
| Below secondary                      | 13 (1.8)                            | 32.4                         |
| Secondary                            | 138 (19.5)                          | 18.9                         |
| Post-secondary                       | 243 (34.5)                          | 11.1                         |
| Diploma & Professional qualification |                                     | 14.8                         |
| University                           | 308 (43.6)                          | 11.7                         |
| Prefer not to say                    | 4 (0.6)                             | -                            |
| <b>Housing</b>                       |                                     |                              |
| 1-2 room                             | 19 (2.7)                            | 2.1                          |
| 3-4 room                             | 393 (55.7)                          | 38.1                         |
| 5-room & Exec                        | 247 (35.0)                          | 21.5                         |
| Private housing                      | 36 (5.1)                            | 36.5                         |
| Others                               | 11(1.5)                             | 1.4                          |
| <b>Household income</b>              |                                     |                              |
| < \$2,000                            | 81 (11.5)                           | 21                           |
| \$2,000 - \$3,999                    | 148 (21.0)                          | 16.5                         |
| \$4,000 - \$5,999                    | 141 (20.0)                          | 15.3                         |
| \$5,000 - \$9,999                    | 178 (25.2)                          | 21.7                         |
| \$10,000 +                           | 79 (11.2)                           | 25.5                         |
| Do not know                          | 35 (5.0)                            | -                            |
| Prefer not to say                    | 44 (6.1)                            | -                            |



**Table 2** Participants' responses on antibiotic knowledge, attitudes and antibiotic resistance

| <b>Antibiotic knowledge</b>                                                                           | <b>Response</b> | <b>n = 706</b><br>n (%) |
|-------------------------------------------------------------------------------------------------------|-----------------|-------------------------|
| Have you ever heard of a type of medication called 'antibiotics'?                                     | Yes             | 688 (97.5)              |
|                                                                                                       | No              | 18 (2.5)                |
|                                                                                                       |                 | <b>n = 688</b><br>n (%) |
| Antibiotics can help me recover from bacterial infections                                             | Agree           | 574 (83.4)              |
|                                                                                                       | Disagree        | 43 (6.2)                |
|                                                                                                       | Not sure        | 71 (10.3)               |
| Antibiotics can help me recover from viral infections                                                 | Agree           | 314 (45.6)              |
|                                                                                                       | Disagree        | 266 (38.7)              |
|                                                                                                       | Not sure        | 108 (15.7)              |
| Antibiotics can help me recover from the common cold and flu                                          | Agree           | 228 (33.1)              |
|                                                                                                       | Disagree        | 364 (52.9)              |
|                                                                                                       | Not sure        | 96 (14.0)               |
| Antibiotics can help me recover from serious symptoms of cold and flu                                 | Agree           | 319 (46.4)              |
|                                                                                                       | Disagree        | 256 (37.2)              |
|                                                                                                       | Not sure        | 113 (16.4)              |
| Antibiotics can speed up my recovery from the common cold and flu                                     | Agree           | 250 (36.3)              |
|                                                                                                       | Disagree        | 315 (45.8)              |
|                                                                                                       | Not sure        | 123 (17.9)              |
|                                                                                                       |                 |                         |
| <b>Antibiotic attitudes</b>                                                                           | <b>Response</b> | <b>n = 688</b><br>n (%) |
| It is okay to share my antibiotics with family and friends when they are sick with the same symptoms  | Agree           | 50 (7.3)                |
|                                                                                                       | Disagree        | 595 (86.5)              |
|                                                                                                       | Not sure        | 43 (6.2)                |
| It is okay to share my antibiotics with family and friends when they are sick with different symptoms | Agree           | 9 (1.3)                 |
|                                                                                                       | Disagree        | 652 (94.8)              |
|                                                                                                       | Not sure        | 27 (9.3)                |
| It is okay to share my antibiotics with my pets when they are sick                                    | Agree           | 7 (1.0)                 |
|                                                                                                       | Disagree        | 661 (96.1)              |
|                                                                                                       | Not sure        | 20 (2.9)                |
| It is okay to keep leftover antibiotics and use them again when I fall sick in the future             | Agree           | 39 (5.7)                |
|                                                                                                       | Disagree        | 604 (87.8)              |
|                                                                                                       | Not sure        | 45 (6.5)                |
| It is okay for me to use my leftover antibiotics when I have the same symptoms as before              | Agree           | 59 (8.6)                |
|                                                                                                       | Disagree        | 590 (85.8)              |
|                                                                                                       | Not sure        | 39 (5.7)                |
| It is important to always finish the course of antibiotics prescribed to me                           | Agree           | 642 (93.3)              |
|                                                                                                       | Disagree        | 28 (4.1)                |
|                                                                                                       | Not sure        | 18 (2.6)                |
| It is okay not to finish the course of antibiotics prescribed to me when I feel better                | Agree           | 56 (8.4)                |
|                                                                                                       | Disagree        | 592 (86.0)              |
|                                                                                                       | Not sure        | 67 (9.7)                |
| It is okay not to finish the course of antibiotics prescribed to me when I have an alternative remedy | Agree           | 58 (8.4)                |
|                                                                                                       | Disagree        | 563 (81.8)              |
|                                                                                                       | Not sure        | 67 (9.7)                |
| It is okay to miss a dose during the course of                                                        | Agree           | 139 (20.2)              |

|                                                                                                                   |                 |                         |
|-------------------------------------------------------------------------------------------------------------------|-----------------|-------------------------|
| antibiotics prescribed to me                                                                                      | Disagree        | 433 (62.9)              |
|                                                                                                                   | Not sure        | 116 (16.9)              |
| <b>Antibiotic resistance knowledge</b>                                                                            |                 |                         |
|                                                                                                                   | <b>Response</b> | <b>n = 706</b><br>n (%) |
| Have you ever heard of the abbreviation 'AMR'?                                                                    | Yes             | 78 (11.0)               |
|                                                                                                                   | No              | 628 (89.0)              |
| Have you ever heard of the term 'antibiotic resistance'?                                                          | Yes             | 427 (60.5)              |
|                                                                                                                   | No              | 279 (39.5)              |
|                                                                                                                   |                 | <b>n = 427</b><br>n (%) |
| Antibiotic resistance occurs when antibiotics become less powerful so they don't work as well                     | Agree           | 207 (48.5)              |
|                                                                                                                   | Disagree        | 177 (41.4)              |
|                                                                                                                   | Not sure        | 43 (10.1)               |
| Antibiotic resistance occurs when your body becomes resistant to the antibiotics and they no longer work as well  | Agree           | 266 (62.3)              |
|                                                                                                                   | Disagree        | 127 (29.7)              |
|                                                                                                                   | Not sure        | 34 (8.0)                |
| Antibiotic resistance occurs when bacteria become resistant to the antibiotics so they are more difficult to kill | Agree           | 382 (89.5)              |
|                                                                                                                   | Disagree        | 18 (4.2)                |
|                                                                                                                   | Not sure        | 27 (6.3)                |
| Antibiotic resistance only affects people with serious infections in hospitals                                    | Agree           | 31 (7.3)                |
|                                                                                                                   | Disagree        | 334 (78.2)              |
|                                                                                                                   | Not sure        | 62 (14.5)               |
| Antibiotic resistance affects common infections such as sore throats and urinary tract infections                 | Agree           | 188 (44.0)              |
|                                                                                                                   | Disagree        | 100 (23.4)              |
|                                                                                                                   | Not sure        | 139 (32.6)              |
| If I use antibiotics appropriately, I don't have to worry about getting antibiotic resistant infections           | Agree           | 190 (44.5)              |
|                                                                                                                   | Disagree        | 141 (33.0)              |
|                                                                                                                   | Not sure        | 96 (22.5)               |
| How other people use antibiotics doesn't affect my chance of getting antibiotic resistant infections              | Agree           | 157 (36.8)              |
|                                                                                                                   | Disagree        | 183 (42.9)              |
|                                                                                                                   | Not sure        | 87 (20.4)               |
| How I use antibiotics doesn't affect other's peoples' chances of getting antibiotic resistant infections          | Agree           | 169 (39.6)              |
|                                                                                                                   | Disagree        | 176 (41.2)              |
|                                                                                                                   | Not sure        | 82 (19.2)               |

**Table 3** Univariate analysis: Participant characteristics associated with knowledge and attitude scores

|                                                                                             | Knowledge score           |               | Attitude score            |               |
|---------------------------------------------------------------------------------------------|---------------------------|---------------|---------------------------|---------------|
|                                                                                             | Coefficient               | 95% CI        | Coefficient               | 95% CI        |
| Estimate                                                                                    | 10.99                     | 7.80 – 11.35  | 8.19                      | 6.99 – 9.38   |
| <b>Sex</b>                                                                                  |                           |               |                           |               |
| Female <sup>#</sup>                                                                         |                           |               |                           |               |
| Male                                                                                        | 0.68*                     | 0.15 – 1.22   | -0.40*                    | -0.77 – -0.03 |
| <b>Ethnicity</b>                                                                            |                           |               |                           |               |
| Chinese <sup>#</sup>                                                                        |                           |               |                           |               |
| Malay                                                                                       | -0.69                     | -1.81 – -0.43 | -1.04**                   | -1.76 – -0.33 |
| Indian                                                                                      | 0.23                      | -0.62 – 1.08  | -0.32                     | -0.89 – 0.25  |
| Other                                                                                       | -0.13                     | -1.61 – 1.35  | 0.25                      | -0.73 – 1.22  |
| <b>Age</b>                                                                                  | -0.03*                    | -0.06 – -0.01 | 0.01                      | -0.00 – 0.03  |
| <b>Education</b>                                                                            |                           |               |                           |               |
| University <sup>#</sup>                                                                     |                           |               |                           |               |
| Primary (PSLE)                                                                              | -0.47                     | -4.48 – 3.53  | -1.10                     | -3.06 – 0.86  |
| Secondary ('O'/'N' Level)                                                                   | -1.64***                  | -2.53 – -0.75 | -1.16***                  | -1.71 – -0.60 |
| 'A' Level/Polytechnic/Diploma                                                               | 0.33                      | -0.26 – 0.94  | -0.50*                    | -0.94 – -0.06 |
| ITE/NTC                                                                                     | 0.06                      | -1.92 – 2.04  | -0.13                     | -1.17 – 0.91  |
| <b>Housing</b>                                                                              |                           |               |                           |               |
| 5 – room HDB/executive flat <sup>#</sup>                                                    |                           |               |                           |               |
| 1 – 2 room HDB <sup>+</sup>                                                                 | 0.23                      | -2.13 – 2.59  | -0.59                     | -1.79 – 0.62  |
| 3 – room HDB                                                                                | -1.01*                    | -1.90 – -0.13 | -0.83**                   | -1.42 – -0.24 |
| 4 – room HDB                                                                                | -0.24                     | -0.81 – 0.34  | -0.37                     | -0.78 – 0.05  |
| Condominium                                                                                 | 0.22                      | -1.13 – 1.56  | -0.56                     | -1.56 – 0.44  |
| Landed house                                                                                | -1.02                     | -2.79 – 0.74  | 0.78                      | -0.73 – 2.28  |
| <b>Income</b>                                                                               |                           |               |                           |               |
| < \$2000 <sup>#</sup>                                                                       |                           |               |                           |               |
| \$2000 - \$3999                                                                             | -0.80                     | -1.91 – 0.31  | -0.26                     | -0.95 – 0.42  |
| \$4000 - \$5999                                                                             | -0.49                     | -1.63 – 0.65  | -0.24                     | -0.95 – 0.48  |
| \$6000 - \$10000                                                                            | -0.21                     | -1.35 – 0.94  | -0.12                     | -0.84 – 0.60  |
| > \$10000                                                                                   | 0.40                      | -0.83 – 1.62  | -0.17                     | -1.01 – 0.68  |
| <b>Marital status</b>                                                                       |                           |               |                           |               |
| Married <sup>#</sup>                                                                        |                           |               |                           |               |
| Divorced                                                                                    | -0.34                     | -1.97 – 1.29  | 0.04                      | -0.88 – 0.96  |
| Never married                                                                               | 0.23                      | -0.44 – 0.91  | -0.32                     | -0.79 – 0.14  |
| Widowed                                                                                     | -0.71                     | -3.50 – 2.19  | -0.34                     | -1.95 – 1.29  |
| Separated but not divorced                                                                  | 2.02                      | -1.80 – 5.83  | 0.85                      | -1.85 – 3.56  |
|                                                                                             | Adjusted R-squared = 0.12 |               | Adjusted R-squared = 0.05 |               |
| <sup>#</sup> Reference groups                                                               |                           |               |                           |               |
| *p ≤ 0.05, **p ≤ 0.01, ***p ≤ 0.001                                                         |                           |               |                           |               |
| <sup>+</sup> Public housing in Singapore managed by the Housing and Development Board (HDB) |                           |               |                           |               |

**Table 4** Multivariable regression analysis

|                 | Multivariable linear regression |               | Multivariable logistic regression |               |                              |               |                               |               |
|-----------------|---------------------------------|---------------|-----------------------------------|---------------|------------------------------|---------------|-------------------------------|---------------|
|                 | <b>Attitudes</b>                |               | <b>Expected antibiotics</b>       |               | <b>Asked for antibiotics</b> |               | <b>Prescribed antibiotics</b> |               |
|                 | <b>Coefficient</b>              | <b>95% CI</b> | <b>OR</b>                         | <b>95% CI</b> | <b>OR</b>                    | <b>95% CI</b> | <b>OR</b>                     | <b>95% CI</b> |
| Estimate        | 7.49                            | 5.80 – 9.18   | -                                 | -             | -                            | -             | -                             | -             |
| Knowledge score | 0.29***                         | 0.20 – 0.37   | 0.90                              | 0.77 – 1.04   | 0.96                         | 0.79 – 1.16   | 0.90                          | 0.79 – 1.05   |
| Attitude score  | -                               | -             | 0.84*                             | 0.72 – 0.99   | 0.78                         | 0.71 – 1.07   | 0.76                          | 0.63 – 0.90   |

All regression results are adjusted for sociodemographic variables (i.e. gender, income, housing, education, ethnicity, marital status and age)

\*p ≤ 0.05, \*\*p ≤ 0.01, \*\*\*p ≤ 0.001

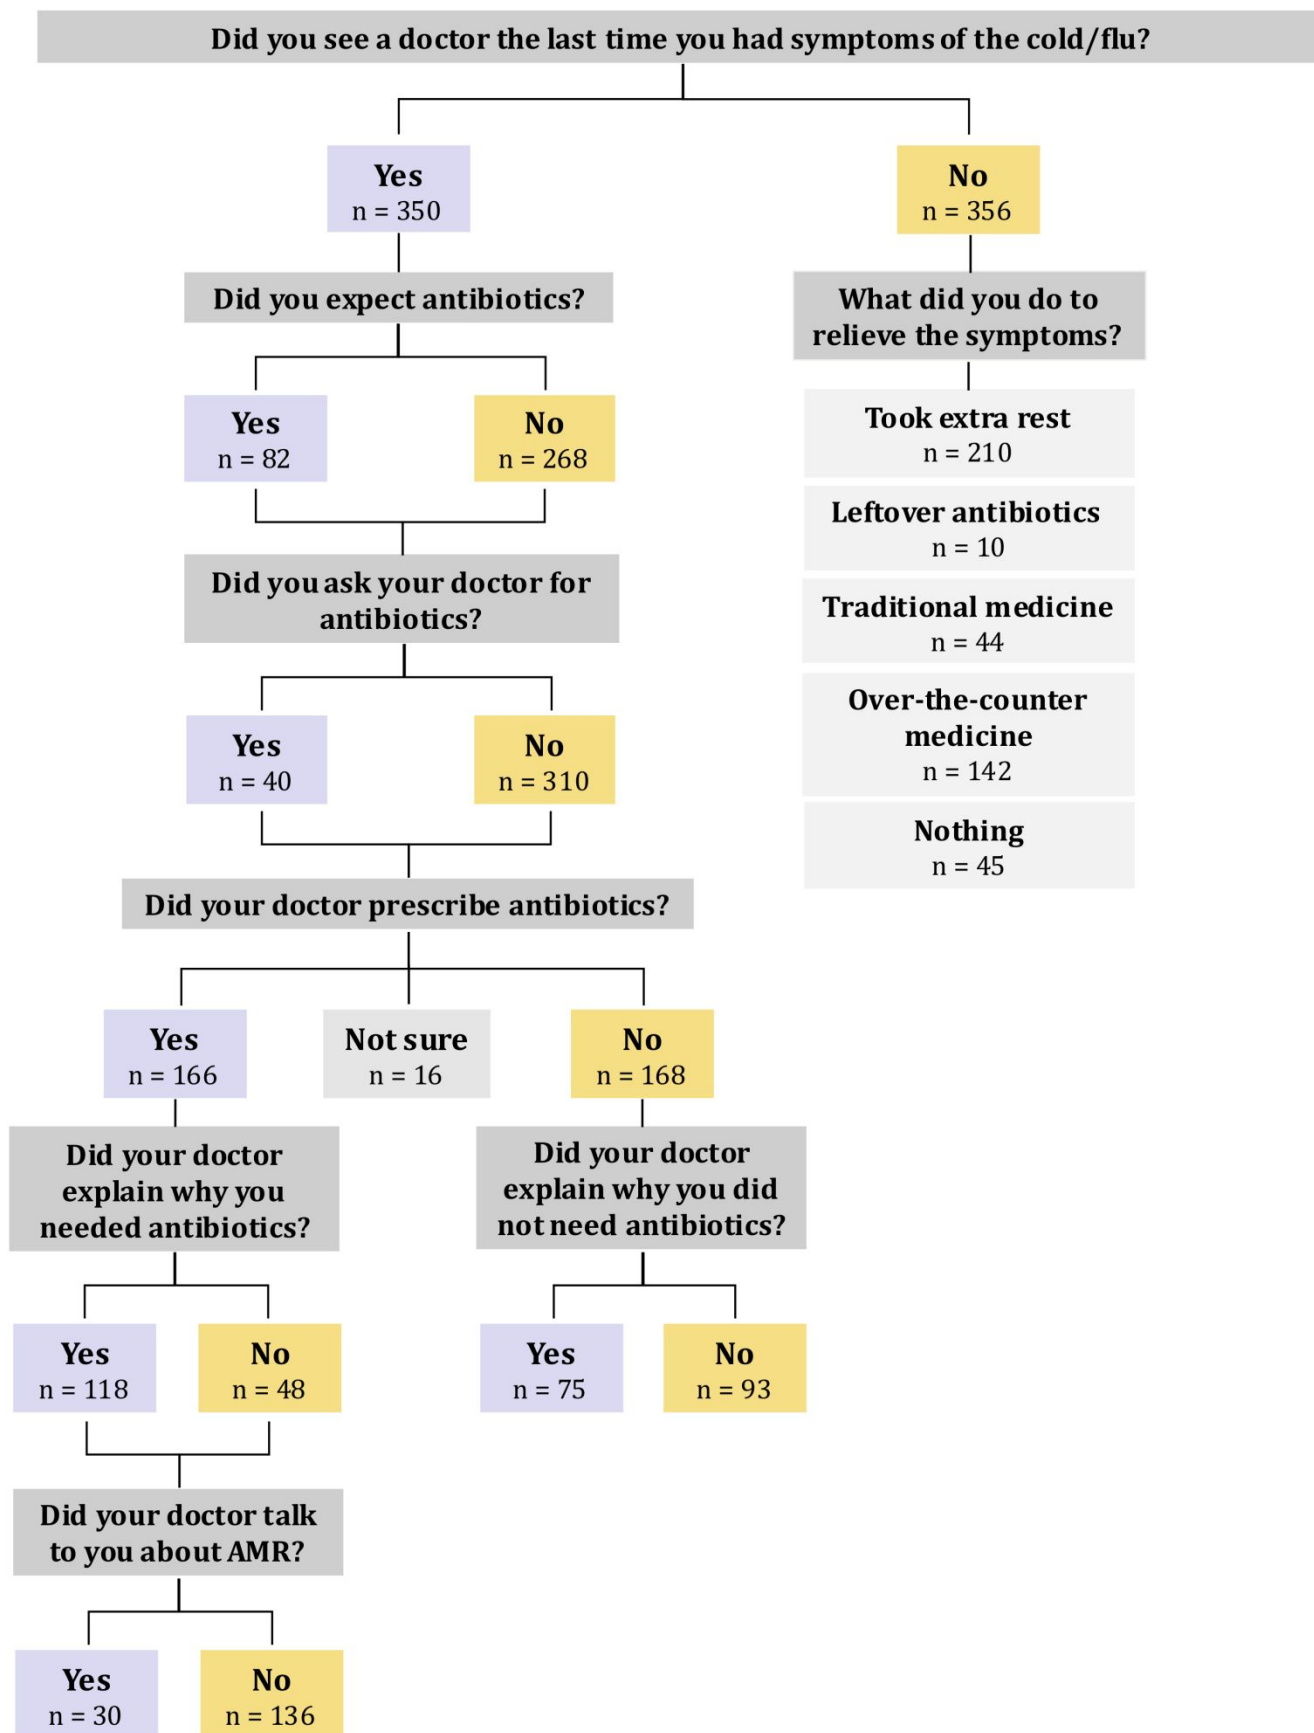

**Figure 1** Participants' cold/flu practices

**APPENDIX C**

1  
2  
3  
4  
5  
6  
7  
8  
9  
10  
11  
12  
13  
14  
15  
16  
17  
18  
19  
20  
21  
22  
23  
24  
25  
26  
27  
28  
29  
30  
31  
32  
33  
34  
35  
36  
37  
38  
39  
40  
41  
42  
43  
44  
45  
46  
47  
48  
49  
50  
51  
52  
53  
54  
55  
56  
57  
58  
59  
60

For peer review only

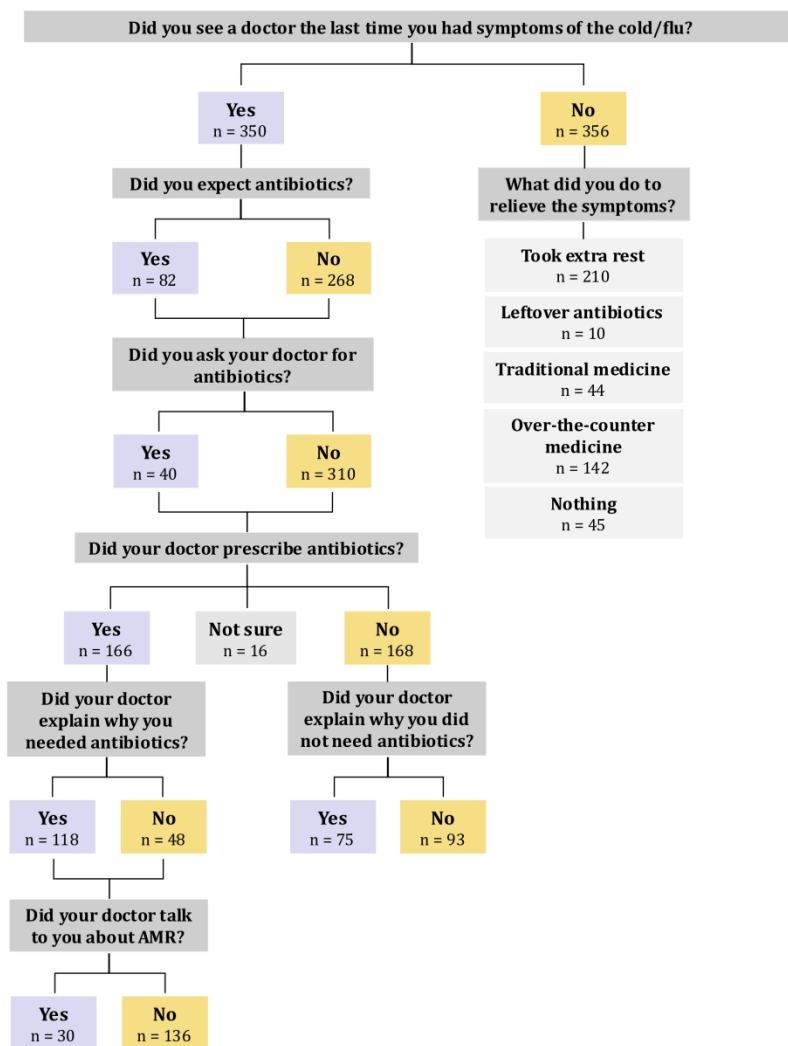

Figure 1 Participants' cold/flu practices

Figure 1

Survey title: A survey of knowledge, attitudes and practices surrounding antibiotics and vaccines in Singapore

Section 1 - Knowledge and attitudes regarding antibiotics

| <i>First, I'd like to ask you some questions about antibiotic medications</i>                                                                       |                                                                                                                                                                                                                                                                                                 |                                                                                                          |
|-----------------------------------------------------------------------------------------------------------------------------------------------------|-------------------------------------------------------------------------------------------------------------------------------------------------------------------------------------------------------------------------------------------------------------------------------------------------|----------------------------------------------------------------------------------------------------------|
| 1.1                                                                                                                                                 | <p>Have you ever heard of a type of medication called 'antibiotics'?</p> <p><i>If necessary, prompt: "Antibiotics are a type of medication used to treat certain types of infections. Some examples of antibiotics are Augmentin, Zithromax, amoxicillin, clarithromycin, streptomycin"</i></p> | <input type="checkbox"/> Yes (go to 1.2)<br><input type="checkbox"/> No (go to Section 2)                |
| <i>Now I will tell you a few statements regarding antibiotics. For each statement, please let me know if you <b>agree, disagree or not sure</b></i> |                                                                                                                                                                                                                                                                                                 |                                                                                                          |
| 1.2                                                                                                                                                 | Antibiotics can help you recover from bacterial infections                                                                                                                                                                                                                                      | <input type="checkbox"/> Agree<br><input type="checkbox"/> Disagree<br><input type="checkbox"/> Not sure |
| 1.3                                                                                                                                                 | Antibiotics can help you recover from viral infections                                                                                                                                                                                                                                          | <input type="checkbox"/> Agree<br><input type="checkbox"/> Disagree<br><input type="checkbox"/> Not sure |
| 1.4                                                                                                                                                 | Antibiotics can help you recover from the common cold and flu                                                                                                                                                                                                                                   | <input type="checkbox"/> Agree<br><input type="checkbox"/> Disagree<br><input type="checkbox"/> Not sure |
| 1.5                                                                                                                                                 | Antibiotics can help you recover from serious symptoms of cold and flu                                                                                                                                                                                                                          | <input type="checkbox"/> Agree<br><input type="checkbox"/> Disagree<br><input type="checkbox"/> Not sure |
| 1.6                                                                                                                                                 | Antibiotics can speed up your recovery from the common cold and flu                                                                                                                                                                                                                             | <input type="checkbox"/> Agree<br><input type="checkbox"/> Disagree<br><input type="checkbox"/> Not sure |
| 1.7                                                                                                                                                 | It is okay to share my antibiotics with family and friends when they are sick with the same symptoms                                                                                                                                                                                            | <input type="checkbox"/> Agree<br><input type="checkbox"/> Disagree<br><input type="checkbox"/> Not sure |
| 1.8                                                                                                                                                 | It is okay to share my antibiotics with family and friends when they are sick with different symptoms                                                                                                                                                                                           | <input type="checkbox"/> Agree<br><input type="checkbox"/> Disagree<br><input type="checkbox"/> Not sure |
| 1.9                                                                                                                                                 | It is okay to share my antibiotics with my pets when they are sick                                                                                                                                                                                                                              | <input type="checkbox"/> Agree<br><input type="checkbox"/> Disagree<br><input type="checkbox"/> Not sure |
| 1.10                                                                                                                                                | It is okay to keep leftover antibiotics and use them again when I fall sick in the future                                                                                                                                                                                                       | <input type="checkbox"/> Agree<br><input type="checkbox"/> Disagree<br><input type="checkbox"/> Not sure |



|      |                                                                                                       |                                                                                                          |
|------|-------------------------------------------------------------------------------------------------------|----------------------------------------------------------------------------------------------------------|
| 1.11 | It is okay for me to use my leftover antibiotics when I have the same symptoms as before              | <input type="checkbox"/> Agree<br><input type="checkbox"/> Disagree<br><input type="checkbox"/> Not sure |
| 1.12 | It is important to always finish the course of antibiotics prescribed to me                           | <input type="checkbox"/> Agree<br><input type="checkbox"/> Disagree<br><input type="checkbox"/> Not sure |
| 1.13 | It is okay not to finish the course of antibiotics prescribed to me when I feel better                | <input type="checkbox"/> Agree<br><input type="checkbox"/> Disagree<br><input type="checkbox"/> Not sure |
| 1.14 | It is okay not to finish the course of antibiotics prescribed to me when I have an alternative remedy | <input type="checkbox"/> Agree<br><input type="checkbox"/> Disagree<br><input type="checkbox"/> Not sure |
| 1.15 | It is okay to miss a dose during the course of antibiotics prescribed to me                           | <input type="checkbox"/> Agree<br><input type="checkbox"/> Disagree<br><input type="checkbox"/> Not sure |

## Section 2 - Knowledge and attitude regarding antibiotic resistance

|                                                                                                                                    |                                                                                                                   |                                                                                                          |
|------------------------------------------------------------------------------------------------------------------------------------|-------------------------------------------------------------------------------------------------------------------|----------------------------------------------------------------------------------------------------------|
| <i>Thanks a lot. We will now move on to questions about antibiotic resistance.</i>                                                 |                                                                                                                   |                                                                                                          |
| 2.1                                                                                                                                | Have you ever heard of the term 'antibiotic resistance'?                                                          | <input type="checkbox"/> Yes (go to 2.2)<br><input type="checkbox"/> No (go to Section 3)                |
| <i>I will now state a few statements regarding antibiotic resistance. Please tell me if you <b>agree, disagree or not sure</b></i> |                                                                                                                   |                                                                                                          |
| 2.2                                                                                                                                | Antibiotic resistance occurs when antibiotics become less powerful so they don't work as well                     | <input type="checkbox"/> Agree<br><input type="checkbox"/> Disagree<br><input type="checkbox"/> Not sure |
| 2.3                                                                                                                                | Antibiotic resistance occurs when your body becomes resistant to the antibiotics and they no longer work as well  | <input type="checkbox"/> Agree<br><input type="checkbox"/> Disagree<br><input type="checkbox"/> Not sure |
| 2.4                                                                                                                                | Antibiotic resistance occurs when bacteria become resistant to the antibiotics so they are more difficult to kill | <input type="checkbox"/> Agree<br><input type="checkbox"/> Disagree<br><input type="checkbox"/> Not sure |
| 2.5                                                                                                                                | If I use antibiotics appropriately, I don't have to worry about getting antibiotic resistant infections           | <input type="checkbox"/> Agree<br><input type="checkbox"/> Disagree<br><input type="checkbox"/> Not sure |
| 2.6                                                                                                                                | How other people use antibiotics doesn't affect my chance of getting antibiotic resistant infections.             | <input type="checkbox"/> Agree<br><input type="checkbox"/> Disagree<br><input type="checkbox"/> Not sure |
| 2.7                                                                                                                                | How I use antibiotic doesn't affect other people's chance of getting antibiotic resistant infections              | <input type="checkbox"/> Agree<br><input type="checkbox"/> Disagree<br><input type="checkbox"/> Not sure |

| <i>Which of the following do you think can reduce the spread of antibiotic resistance? For each option, please answer yes, no or not sure</i> |                                                            |                                                                                                  |
|-----------------------------------------------------------------------------------------------------------------------------------------------|------------------------------------------------------------|--------------------------------------------------------------------------------------------------|
| 2.8                                                                                                                                           | Using fewer antibiotics                                    | <input type="checkbox"/> Yes<br><input type="checkbox"/> No<br><input type="checkbox"/> Not sure |
| 2.9                                                                                                                                           | Vaccination                                                | <input type="checkbox"/> Yes<br><input type="checkbox"/> No<br><input type="checkbox"/> Not sure |
| 2.10                                                                                                                                          | Handwashing                                                | <input type="checkbox"/> Yes<br><input type="checkbox"/> No<br><input type="checkbox"/> Not sure |
| 2.11                                                                                                                                          | Better hygiene and infection control measures in hospitals | <input type="checkbox"/> Yes<br><input type="checkbox"/> No<br><input type="checkbox"/> Not sure |

### *Section 3 - Experiences in using health care services*

| <i>I will now ask you some questions about the last time you had symptoms of cold and flu, like sore throat, coughing, runny nose and fever.</i> |                                                                                                                                                                               |                                                                                                                                                                                                                                                         |
|--------------------------------------------------------------------------------------------------------------------------------------------------|-------------------------------------------------------------------------------------------------------------------------------------------------------------------------------|---------------------------------------------------------------------------------------------------------------------------------------------------------------------------------------------------------------------------------------------------------|
| 3.1                                                                                                                                              | When was the last time you had symptoms of cold and flu?                                                                                                                      | _____ months ago                                                                                                                                                                                                                                        |
| 3.2                                                                                                                                              | How long did your symptoms last?                                                                                                                                              | <input type="checkbox"/> 1-3 days<br><input type="checkbox"/> 4-6 days<br><input type="checkbox"/> ≥ 1 week<br><input type="checkbox"/> Not sure                                                                                                        |
| 3.3                                                                                                                                              | On a scale of 1 to 10, where 1 is not at all severe and 10 is extremely severe, how severe were your symptoms at that time?                                                   | ___ (fill a number from 1 to 10)                                                                                                                                                                                                                        |
| 3.4                                                                                                                                              | Did you see a doctor for these symptoms?                                                                                                                                      | <input type="checkbox"/> Yes (go to 3.6)<br><input type="checkbox"/> No (go to 3.5)                                                                                                                                                                     |
| 3.5                                                                                                                                              | If no, what did you do to relieve the symptoms?                                                                                                                               | <input type="checkbox"/> Took extra rest<br><input type="checkbox"/> Took left-over antibiotics<br><input type="checkbox"/> Other: ___<br><input type="checkbox"/> Took traditional medicine<br><input type="checkbox"/> Took over-the-counter medicine |
| 3.6                                                                                                                                              | If yes, did you feel your doctor took the time to explain your illness to you?                                                                                                | <input type="checkbox"/> Yes<br><input type="checkbox"/> No                                                                                                                                                                                             |
| 3.7                                                                                                                                              | On a scale of 1 to 10, where 1 is not at all satisfied and 10 is extremely satisfied, how satisfied were you with how your doctor answered your questions about your illness? | ___ (fill a number from 1 to 10)                                                                                                                                                                                                                        |

|      |                                                                         |                                                                                                                                                                                                                                                                                                                                                                                                                 |
|------|-------------------------------------------------------------------------|-----------------------------------------------------------------------------------------------------------------------------------------------------------------------------------------------------------------------------------------------------------------------------------------------------------------------------------------------------------------------------------------------------------------|
| 3.8  | When you went to see the doctor, what did you expect?                   | <input type="checkbox"/> Advice for self-care<br><input type="checkbox"/> Information about the illnesses such as duration<br><input type="checkbox"/> Rule out more serious illnesses<br><input type="checkbox"/> For referral to hospital or specialists<br><input type="checkbox"/> Medical leave for work<br><input type="checkbox"/> Antibiotics<br><input type="checkbox"/> Other (please specify: _____) |
| 3.9  | Did you ask your doctor for antibiotics?                                | <input type="checkbox"/> Yes<br><input type="checkbox"/> No                                                                                                                                                                                                                                                                                                                                                     |
| 3.10 | Did your doctor prescribe you antibiotics?                              | <input type="checkbox"/> Yes (go to 3.11)<br><input type="checkbox"/> No (go to 3.14)<br><input type="checkbox"/> Not sure (go to Section 4)                                                                                                                                                                                                                                                                    |
| 3.11 | Did your doctor explain to you why you needed antibiotics?              | <input type="checkbox"/> Yes<br><input type="checkbox"/> No                                                                                                                                                                                                                                                                                                                                                     |
| 3.12 | Did your doctor talk to you about antibiotic resistance?                | <input type="checkbox"/> Yes<br><input type="checkbox"/> No                                                                                                                                                                                                                                                                                                                                                     |
| 3.13 | Did your doctor talk to you about possible side-effects of antibiotics? | <input type="checkbox"/> Yes<br><input type="checkbox"/> No                                                                                                                                                                                                                                                                                                                                                     |
| 3.14 | Did your doctor explain to you why you did not need antibiotics?        | <input type="checkbox"/> Yes<br><input type="checkbox"/> No                                                                                                                                                                                                                                                                                                                                                     |

#### Section 4 - Vaccination behaviors for different age groups

|                                                                                                                                                |                                                                                                               |                                                                                                                                                                                                                                                                                 |
|------------------------------------------------------------------------------------------------------------------------------------------------|---------------------------------------------------------------------------------------------------------------|---------------------------------------------------------------------------------------------------------------------------------------------------------------------------------------------------------------------------------------------------------------------------------|
| For all participants ( <i>all ages</i> ): I will now ask you some questions about your use of different vaccines to protect against infections |                                                                                                               |                                                                                                                                                                                                                                                                                 |
| 4.1                                                                                                                                            | Have you ever received an influenza vaccine?<br><i>(prompt: Also known as flu shot, flu vaccine, flu jab)</i> | <input type="checkbox"/> Yes<br><input type="checkbox"/> No<br><input type="checkbox"/> Not sure                                                                                                                                                                                |
| 4.2                                                                                                                                            | Have you received an influenza vaccine in the past year?                                                      | <input type="checkbox"/> Yes (go to 4.3)<br><input type="checkbox"/> No (go to next section)<br><input type="checkbox"/> Not sure                                                                                                                                               |
| 4.3                                                                                                                                            | When was the last time you received it?                                                                       | <input type="checkbox"/> In the past month<br><input type="checkbox"/> 1-3 months ago<br><input type="checkbox"/> 4-6 months ago<br><input type="checkbox"/> 6-12 months ago                                                                                                    |
| 4.4                                                                                                                                            | What was the reason that you received the influenza vaccine?                                                  | <input type="checkbox"/> Recommended by my doctor because I am/was traveling<br><input type="checkbox"/> Recommended by my doctor because I am/was pregnant<br><input type="checkbox"/> My job requires it<br><input type="checkbox"/> It was offered at no cost by my employer |

|  |  |                                                                                                                          |
|--|--|--------------------------------------------------------------------------------------------------------------------------|
|  |  | <input type="checkbox"/> I usually get annual flu vaccinations<br><input type="checkbox"/> Other (please specify: _____) |
|--|--|--------------------------------------------------------------------------------------------------------------------------|

| <i>For participants aged 65 and above</i> |                                                                                                                                                                                                                                                                                     |                                                                                                                                   |
|-------------------------------------------|-------------------------------------------------------------------------------------------------------------------------------------------------------------------------------------------------------------------------------------------------------------------------------------|-----------------------------------------------------------------------------------------------------------------------------------|
| 5.1                                       | Have you ever received the pneumococcal vaccine?<br><i>(Prompt: This is a vaccination against pneumonia)</i>                                                                                                                                                                        | <input type="checkbox"/> Yes (go to 5.2)<br><input type="checkbox"/> No (go to 5.4)<br><input type="checkbox"/> Not sure          |
| 5.2                                       | How many doses of the vaccine did you receive?<br><i>(Prompt: Pneumococcal vaccines in the NAIs include 13-valent pneumococcal conjugate vaccine (PCV13) and 23-valent pneumococcal polysaccharide vaccine (PPSV23)—one dose each is recommended for persons aged 65 and above)</i> | <input type="checkbox"/> 1<br><input type="checkbox"/> 2<br><input type="checkbox"/> Not sure                                     |
| 5.3                                       | When did you receive the last dose ?                                                                                                                                                                                                                                                | _____<br><input type="checkbox"/> Not sure                                                                                        |
| 5.4                                       | Have you ever received the varicella vaccine?<br><i>(Prompt: The varicella vaccine protects against chickenpox and shingles)</i>                                                                                                                                                    | <input type="checkbox"/> Yes (go to 5.5)<br><input type="checkbox"/> No (go to next section)<br><input type="checkbox"/> Not sure |
| 5.5                                       | How many doses of the vaccine did you receive?                                                                                                                                                                                                                                      | <input type="checkbox"/> 1<br><input type="checkbox"/> 2<br><input type="checkbox"/> Not sure                                     |
| 5.6                                       | When did you receive the last dose?                                                                                                                                                                                                                                                 | _____<br><input type="checkbox"/> Not sure                                                                                        |

| <i>For female participants (18-26 years old) and parents with daughters from the ages of 9-18 years old</i> |                                                                                                                                                                                                                                                                                       |                                                                                                                                   |
|-------------------------------------------------------------------------------------------------------------|---------------------------------------------------------------------------------------------------------------------------------------------------------------------------------------------------------------------------------------------------------------------------------------|-----------------------------------------------------------------------------------------------------------------------------------|
| 6.1                                                                                                         | Have you/has your daughter ever received the HPV vaccine?<br><i>(Prompt: HPV stands for Human Papillomavirus; two vaccines, Gardasil and Cervavix, are currently approved for use in Singapore; the HPV vaccine protects against cervical cancer and is claimable under Medisave)</i> | <input type="checkbox"/> Yes (go to 6.2)<br><input type="checkbox"/> No (go to next section)<br><input type="checkbox"/> Not sure |
| 6.2                                                                                                         | How old were you/was your daughter when you/she received the HPV vaccine?                                                                                                                                                                                                             | Age: _____                                                                                                                        |

|     |                                                                                                                                                                               |                                                                                                                             |
|-----|-------------------------------------------------------------------------------------------------------------------------------------------------------------------------------|-----------------------------------------------------------------------------------------------------------------------------|
|     |                                                                                                                                                                               | <input type="checkbox"/> Not sure                                                                                           |
| 6.3 | How many doses of the vaccine did you/your daughter receive?<br><i>(Prompt: This is recommended for females 9-26 years, this vaccine can be given in either 2 or 3 doses)</i> | <input type="checkbox"/> 1<br><input type="checkbox"/> 2<br><input type="checkbox"/> 3<br><input type="checkbox"/> Not sure |
| 6.4 | When did you/your daughter receive the last dose of the HPV vaccine?                                                                                                          | _____<br><input type="checkbox"/> Not sure                                                                                  |

|                                                                                                                                         |                                                                                                                                                                                                                      |                                                                                                                             |
|-----------------------------------------------------------------------------------------------------------------------------------------|----------------------------------------------------------------------------------------------------------------------------------------------------------------------------------------------------------------------|-----------------------------------------------------------------------------------------------------------------------------|
| <i>For parents with <u>young children under the age of 5</u></i>                                                                        |                                                                                                                                                                                                                      |                                                                                                                             |
| 7.1                                                                                                                                     | Do you have any children under the age of 5?<br><i>(Prompt: Your child has not had his/her 5<sup>th</sup> birthday yet)</i>                                                                                          | <input type="checkbox"/> Yes<br><input type="checkbox"/> No                                                                 |
| 7.2                                                                                                                                     | How many children do you have under the age of 5?                                                                                                                                                                    | _____                                                                                                                       |
| <i>If you have more than one child under the age of 5, please first answer questions about the child <u>whose birthday is next</u>:</i> |                                                                                                                                                                                                                      |                                                                                                                             |
| 7.3                                                                                                                                     | What is your child's birth month and year?                                                                                                                                                                           | Month: ____<br>Year: ____                                                                                                   |
| 7.4                                                                                                                                     | Has your child received an influenza vaccination in the past year?<br><i>(Prompt: This is also known as flu vaccine, flu shot, flu jab)</i>                                                                          | <input type="checkbox"/> Yes<br><input type="checkbox"/> No<br><input type="checkbox"/> Not sure                            |
| 7.5                                                                                                                                     | Has your child ever received the pneumococcal vaccine?<br><i>(Prompt: Also known as PCV13 or Prevnar. This vaccine is given in 3 doses usually at 3, 5 and 12 months of age. PCV13 is claimable under Medisave)</i>  | <input type="checkbox"/> Yes (go to 7.6)<br><input type="checkbox"/> No (go to 7.9)<br><input type="checkbox"/> Not sure    |
| 7.6                                                                                                                                     | How many doses of the pneumococcal vaccine did your child receive?                                                                                                                                                   | <input type="checkbox"/> 1<br><input type="checkbox"/> 2<br><input type="checkbox"/> 3<br><input type="checkbox"/> Not sure |
| 7.7                                                                                                                                     | When did your child receive the last dose of pneumococcal vaccine?                                                                                                                                                   | _____<br><input type="checkbox"/> Not sure                                                                                  |
| 7.8                                                                                                                                     | Has your child ever received the rotavirus vaccine?<br><i>(prompt: This vaccine protects against childhood diarrhoea and is given as drops in the mouth. Usually 2 or 3 doses are given before 8 months of age".</i> | <input type="checkbox"/> Yes<br><input type="checkbox"/> No<br><input type="checkbox"/> Not sure                            |

|      |                                                                                                                                                                                                   |                                                                                                                                                   |
|------|---------------------------------------------------------------------------------------------------------------------------------------------------------------------------------------------------|---------------------------------------------------------------------------------------------------------------------------------------------------|
|      | <i>there are two types licenced in Singapore, Rotarix (RV5, 2 doses) and RotaTeq (RV1, 3 doses) usually given before 8 months of age. This vaccine is not currently claimable under Medisave)</i> |                                                                                                                                                   |
| 7.9  | How old was your child when he/she received the rotavirus vaccine?                                                                                                                                | Age: ____ months<br><input type="checkbox"/> Not sure                                                                                             |
| 7.10 | Which type of rotavirus vaccination did your child receive?                                                                                                                                       | <input type="checkbox"/> RotaTeq™ (given in 3 doses)<br><input type="checkbox"/> Rotarix™ (given in 2 doses)<br><input type="checkbox"/> Not sure |
| 7.11 | How many doses of the vaccine did your child receive?                                                                                                                                             | <input type="checkbox"/> 1<br><input type="checkbox"/> 2<br><input type="checkbox"/> 3<br><input type="checkbox"/> Not sure                       |

## APPENDIX B

|                                                      |                                                                                                                   |                    |
|------------------------------------------------------|-------------------------------------------------------------------------------------------------------------------|--------------------|
| <b>Knowledge score</b><br>Range: 0 – 14<br>Median: 8 |                                                                                                                   |                    |
| <b>Knowledge of antibiotic resistance</b>            | Have you ever heard of the abbreviation 'AMR'?                                                                    | Yes = 1 point      |
|                                                      | Have you ever heard of the term 'antibiotic resistance'?                                                          |                    |
|                                                      | Antibiotic resistance occurs when antibiotics become less powerful so they don't work as well                     | Disagree = 1 point |
|                                                      | Antibiotic resistance occurs when your body becomes resistant to the antibiotics and they no longer work as well  |                    |
|                                                      | Antibiotic resistance only affects people with serious infections in hospitals                                    |                    |
|                                                      | If I use antibiotics appropriately I don't have to worry about getting antibiotic resistant infections            |                    |
|                                                      | How other people use antibiotics doesn't affect my chance of getting antibiotic resistant infections              |                    |
|                                                      | How I use antibiotics doesn't affect other people's chances of getting antibiotic resistant infections            | Agree = 1 point    |
|                                                      | Antibiotic resistance occurs when bacteria become resistant to the antibiotics so they are more difficult to kill |                    |
|                                                      | Antibiotic resistance affects common infections such as sore throats and urinary tract infections                 |                    |
|                                                      | Using fewer antibiotics will reduce the spread of antibiotic resistance                                           |                    |
|                                                      | Vaccinations will reduce the spread of antibiotic resistance                                                      |                    |
|                                                      | Handwashing will reduce the spread of antibiotic resistance                                                       |                    |
|                                                      | Better hygiene and infection control measures in hospitals will reduce the spread of antibiotic resistance        |                    |

## APPENDIX B

|                                                                             |                                                                                                       |                    |
|-----------------------------------------------------------------------------|-------------------------------------------------------------------------------------------------------|--------------------|
| <b>Attitudes score</b><br>Range: 0 – 11<br>Median: 7                        |                                                                                                       |                    |
| <b>Attitudes towards antibiotic use (6 points)</b>                          | Antibiotics can help me recover from bacterial infections                                             | Agree = 1 point    |
|                                                                             | It is important to always finish the course of antibiotics prescribed to me                           |                    |
|                                                                             | Antibiotics can help me recover from viral infections                                                 | Disagree = 1 point |
|                                                                             | Antibiotics can help me recover from the common cold and flu                                          |                    |
|                                                                             | Antibiotics can help me recover from serious symptoms of cold and flu                                 |                    |
|                                                                             | Antibiotics can speed up my recovery from the common cold and flu                                     |                    |
|                                                                             | It is okay to keep leftover antibiotics and use them again when I fall sick in the future             |                    |
|                                                                             | It is okay to use my leftover antibiotics when I have the same symptoms as before                     |                    |
|                                                                             | It is okay not to finish the course of antibiotics prescribed to me when I feel better                |                    |
|                                                                             | It is okay not to finish the course of antibiotics prescribed to me when I have an alternative remedy |                    |
| It is okay to miss a dose during the course of antibiotics prescribed to me |                                                                                                       |                    |



# Appendix C

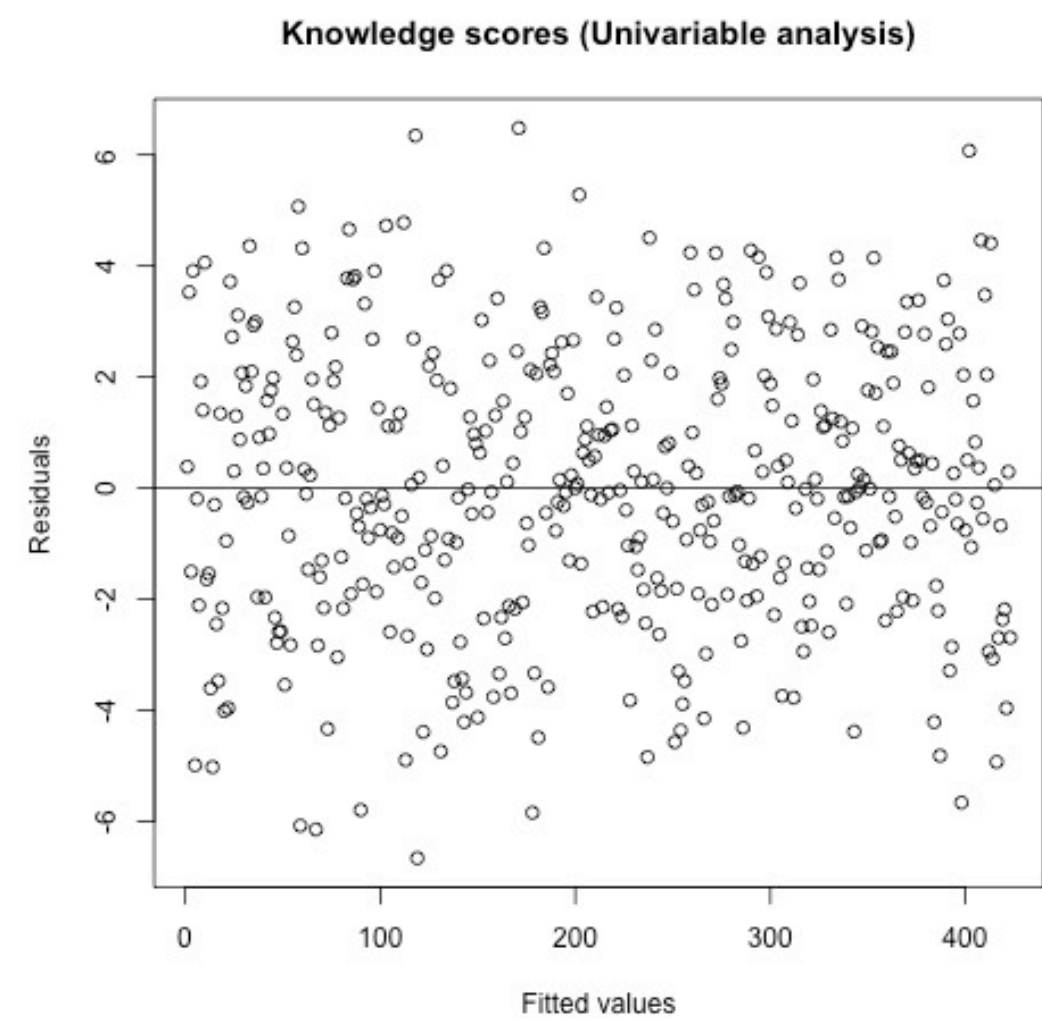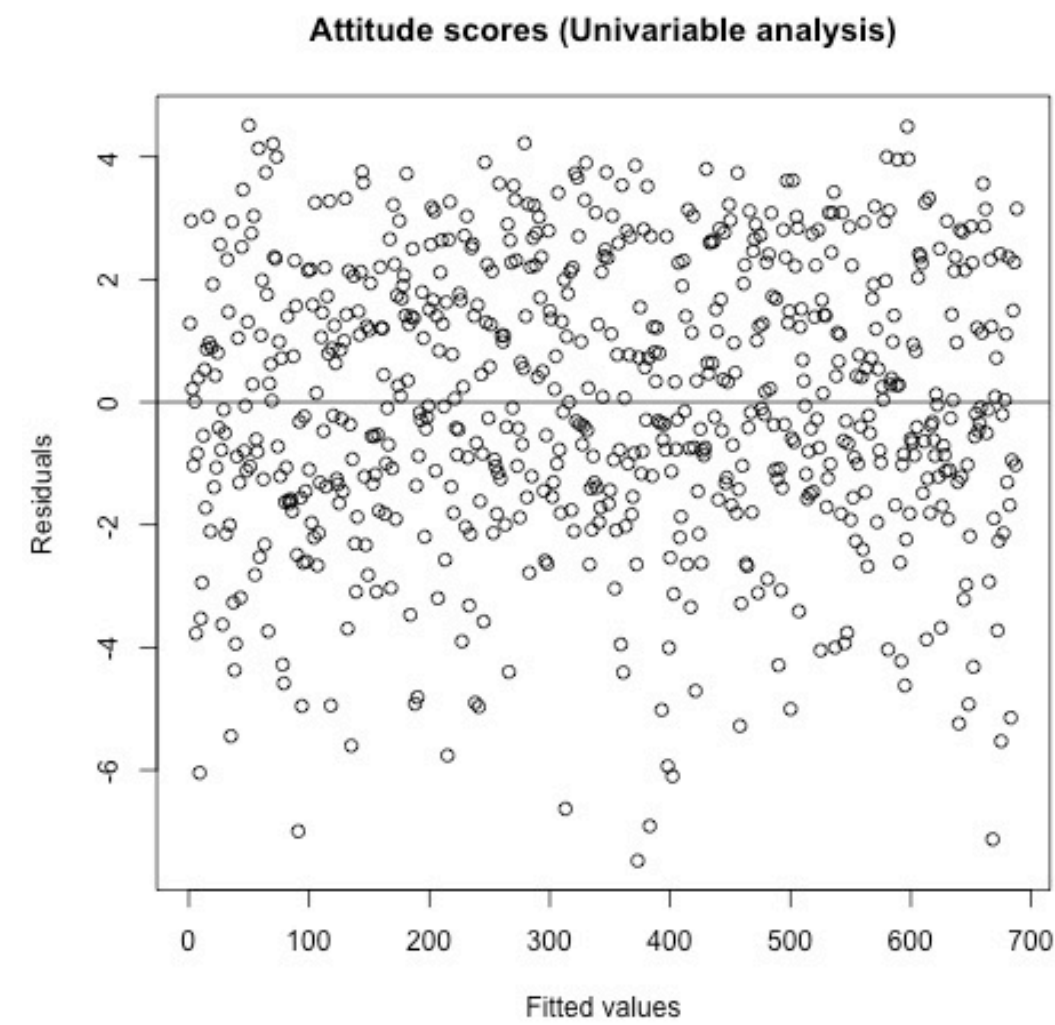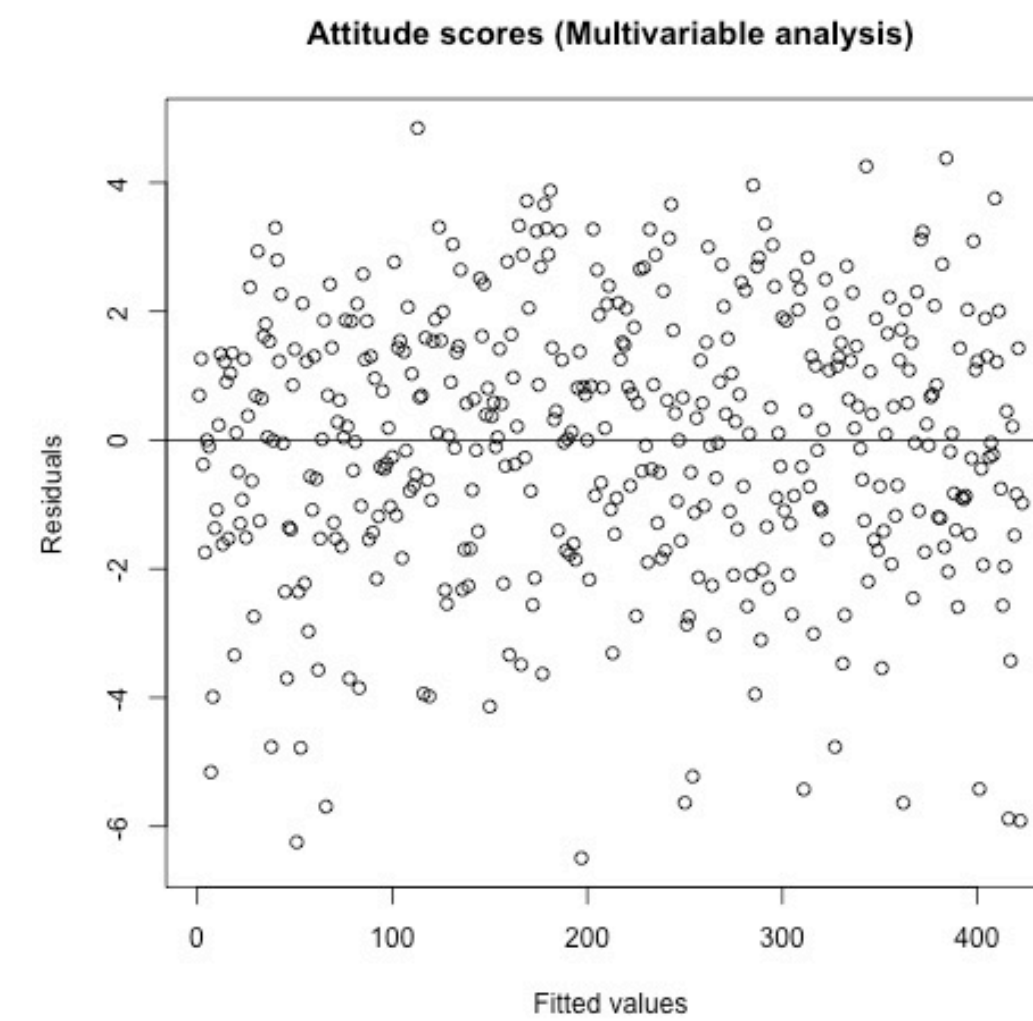

STROBE Statement—Checklist of items that should be included in reports of *cross-sectional studies*

|                              | Item No | Recommendation                                                                                                                                                                                               | Page No |
|------------------------------|---------|--------------------------------------------------------------------------------------------------------------------------------------------------------------------------------------------------------------|---------|
| <b>Title and abstract</b>    | 1       | (a) Indicate the study's design with a commonly used term in the title or the abstract                                                                                                                       | 1       |
|                              |         | (b) Provide in the abstract an informative and balanced summary of what was done and what was found                                                                                                          | 2       |
| <b>Introduction</b>          |         |                                                                                                                                                                                                              |         |
| Background/rationale         | 2       | Explain the scientific background and rationale for the investigation being reported                                                                                                                         | 4       |
| Objectives                   | 3       | State specific objectives, including any prespecified hypotheses                                                                                                                                             | 4       |
| <b>Methods</b>               |         |                                                                                                                                                                                                              |         |
| Study design                 | 4       | Present key elements of study design early in the paper                                                                                                                                                      | 4       |
| Setting                      | 5       | Describe the setting, locations, and relevant dates, including periods of recruitment, exposure, follow-up, and data collection                                                                              | 4       |
| Participants                 | 6       | (a) Give the eligibility criteria, and the sources and methods of selection of participants                                                                                                                  | 4       |
| Variables                    | 7       | Clearly define all outcomes, exposures, predictors, potential confounders, and effect modifiers. Give diagnostic criteria, if applicable                                                                     | 4-5     |
| Data sources/<br>measurement | 8*      | For each variable of interest, give sources of data and details of methods of assessment (measurement). Describe comparability of assessment methods if there is more than one group                         | 4-5     |
| Bias                         | 9       | Describe any efforts to address potential sources of bias                                                                                                                                                    | 5       |
| Study size                   | 10      | Explain how the study size was arrived at                                                                                                                                                                    | 4       |
| Quantitative variables       | 11      | Explain how quantitative variables were handled in the analyses. If applicable, describe which groupings were chosen and why                                                                                 | 5       |
| Statistical methods          | 12      | (a) Describe all statistical methods, including those used to control for confounding                                                                                                                        | 5       |
|                              |         | (b) Describe any methods used to examine subgroups and interactions                                                                                                                                          | 5       |
|                              |         | (c) Explain how missing data were addressed                                                                                                                                                                  | Na      |
|                              |         | (d) If applicable, describe analytical methods taking account of sampling strategy                                                                                                                           | Na      |
|                              |         | (e) Describe any sensitivity analyses                                                                                                                                                                        | 5       |
| <b>Results</b>               |         |                                                                                                                                                                                                              |         |
| Participants                 | 13*     | (a) Report numbers of individuals at each stage of study—eg numbers potentially eligible, examined for eligibility, confirmed eligible, included in the study, completing follow-up, and analysed            | 5-6     |
|                              |         | (b) Give reasons for non-participation at each stage                                                                                                                                                         | Na      |
|                              |         | (c) Consider use of a flow diagram                                                                                                                                                                           | Na      |
| Descriptive data             | 14*     | (a) Give characteristics of study participants (eg demographic, clinical, social) and information on exposures and potential confounders                                                                     | 6       |
|                              |         | (b) Indicate number of participants with missing data for each variable of interest                                                                                                                          | 6-7     |
| Outcome data                 | 15*     | Report numbers of outcome events or summary measures                                                                                                                                                         | 6-7     |
| Main results                 | 16      | (a) Give unadjusted estimates and, if applicable, confounder-adjusted estimates and their precision (eg, 95% confidence interval). Make clear which confounders were adjusted for and why they were included | 7       |

|                          |    |                                                                                                                                                                            |     |
|--------------------------|----|----------------------------------------------------------------------------------------------------------------------------------------------------------------------------|-----|
|                          |    | (b) Report category boundaries when continuous variables were categorized                                                                                                  | 7   |
|                          |    | (c) If relevant, consider translating estimates of relative risk into absolute risk for a meaningful time period                                                           | Na  |
| Other analyses           | 17 | Report other analyses done—eg analyses of subgroups and interactions, and sensitivity analyses                                                                             | 7-8 |
| <b>Discussion</b>        |    |                                                                                                                                                                            |     |
| Key results              | 18 | Summarise key results with reference to study objectives                                                                                                                   | 7   |
| Limitations              | 19 | Discuss limitations of the study, taking into account sources of potential bias or imprecision. Discuss both direction and magnitude of any potential bias                 | 8   |
| Interpretation           | 20 | Give a cautious overall interpretation of results considering objectives, limitations, multiplicity of analyses, results from similar studies, and other relevant evidence | 8   |
| Generalisability         | 21 | Discuss the generalisability (external validity) of the study results                                                                                                      | 8   |
| <b>Other information</b> |    |                                                                                                                                                                            |     |
| Funding                  | 22 | Give the source of funding and the role of the funders for the present study and, if applicable, for the original study on which the present article is based              | 9   |

\*Give information separately for exposed and unexposed groups.

**Note:** An Explanation and Elaboration article discusses each checklist item and gives methodological background and published examples of transparent reporting. The STROBE checklist is best used in conjunction with this article (freely available on the Web sites of PLoS Medicine at <http://www.plosmedicine.org/>, Annals of Internal Medicine at <http://www.annals.org/>, and Epidemiology at <http://www.epidem.com/>). Information on the STROBE Initiative is available at [www.strobe-statement.org](http://www.strobe-statement.org).

# BMJ Open

## A cross-sectional population survey of public knowledge, attitudes and practices related to antibiotic use and resistance in Singapore

|                                 |                                                                                                                                                                                                                                                                                                                                                                                                                                                        |
|---------------------------------|--------------------------------------------------------------------------------------------------------------------------------------------------------------------------------------------------------------------------------------------------------------------------------------------------------------------------------------------------------------------------------------------------------------------------------------------------------|
| Journal:                        | <i>BMJ Open</i>                                                                                                                                                                                                                                                                                                                                                                                                                                        |
| Manuscript ID                   | bmjopen-2020-048157.R1                                                                                                                                                                                                                                                                                                                                                                                                                                 |
| Article Type:                   | Original research                                                                                                                                                                                                                                                                                                                                                                                                                                      |
| Date Submitted by the Author:   | 09-Apr-2021                                                                                                                                                                                                                                                                                                                                                                                                                                            |
| Complete List of Authors:       | Lim, Jane; National University Singapore Saw Swee Hock School of Public Health,<br>Duong, Minh Cam; National University Singapore Saw Swee Hock School of Public Health<br>Cook, Alex R ; National University Singapore Saw Swee Hock School of Public Health<br>Hsu, Li Yang; National University Singapore Saw Swee Hock School of Public Health<br>Tam, Clarence C; National University Health System; London School of Hygiene & Tropical Medicine |
| <b>Primary Subject Heading</b>: | Public health                                                                                                                                                                                                                                                                                                                                                                                                                                          |
| Secondary Subject Heading:      | Infectious diseases                                                                                                                                                                                                                                                                                                                                                                                                                                    |
| Keywords:                       | Public health < INFECTIOUS DISEASES, EPIDEMIOLOGY, EDUCATION & TRAINING (see Medical Education & Training)                                                                                                                                                                                                                                                                                                                                             |
|                                 |                                                                                                                                                                                                                                                                                                                                                                                                                                                        |

SCHOLARONE™  
Manuscripts



I, the Submitting Author has the right to grant and does grant on behalf of all authors of the Work (as defined in the below author licence), an exclusive licence and/or a non-exclusive licence for contributions from authors who are: i) UK Crown employees; ii) where BMJ has agreed a CC-BY licence shall apply, and/or iii) in accordance with the terms applicable for US Federal Government officers or employees acting as part of their official duties; on a worldwide, perpetual, irrevocable, royalty-free basis to BMJ Publishing Group Ltd ("BMJ") its licensees and where the relevant Journal is co-owned by BMJ to the co-owners of the Journal, to publish the Work in this journal and any other BMJ products and to exploit all rights, as set out in our [licence](#).

The Submitting Author accepts and understands that any supply made under these terms is made by BMJ to the Submitting Author unless you are acting as an employee on behalf of your employer or a postgraduate student of an affiliated institution which is paying any applicable article publishing charge ("APC") for Open Access articles. Where the Submitting Author wishes to make the Work available on an Open Access basis (and intends to pay the relevant APC), the terms of reuse of such Open Access shall be governed by a Creative Commons licence – details of these licences and which [Creative Commons](#) licence will apply to this Work are set out in our licence referred to above.

Other than as permitted in any relevant BMJ Author's Self Archiving Policies, I confirm this Work has not been accepted for publication elsewhere, is not being considered for publication elsewhere and does not duplicate material already published. I confirm all authors consent to publication of this Work and authorise the granting of this licence.

1  
2  
3 1 A cross-sectional population survey of public knowledge, attitudes and practices related to antibiotic  
4 2 use and resistance in Singapore  
5 3

6 4 Jane Mingjie LIM, Minh Cam DUONG<sup>a</sup>, Alex R COOK, Li Yang HSU<sup>a</sup>, Clarence C TAM<sup>a, b</sup>  
7 5

8 6 <sup>a</sup> Saw Swee Hock School of Public Health, National University of Singapore and National University  
9 7 Health System, Singapore  
10 8

11 9 <sup>b</sup> London School of Hygiene & Tropical Medicine, London, England, United Kingdom  
12 10  
13 11

14 12 Word count: 2,926  
15 13

16 14 **\* Corresponding author:**  
17 15

18 16 NUS Saw Swee Hock School of Public Health  
19 17

20 18 National University Health System  
21 19

22 20 12 Science Drive 2  
23 21

24 22 Tahir Foundation Building  
25 23

26 24 Singapore, 117549  
27 25

28 26 Email: clarence.tam@nus.edu.sg  
29 27  
30 28  
31 29  
32 30  
33 31  
34 32  
35 33  
36 34  
37 35  
38 36  
39 37  
40 38  
41 39  
42 40  
43 41  
44 42  
45 43  
46 44  
47 45  
48 46  
49 47  
50 48  
51 49  
52 50  
53 51  
54 52  
55 53  
56 54  
57 55  
58 56  
59 57  
60 58

1  
2  
3 **Abstract**

4  
5  
6 **Objectives:** The WHO's Global Action Plan on Antimicrobial Resistance includes increasing overall  
7 public awareness of appropriate antibiotic use and resistance as a key priority area. We aimed to  
8 measure public knowledge, attitudes and practices of antibiotics and antibiotic resistance in  
9 Singapore, as well as their healthcare seeking behaviours relating to respiratory illnesses, providing  
10 baseline data against which to measure the progress of future interventions.  
11

12  
13 **Design:** A cross-sectional study

14  
15 **Setting:** The general population in Singapore

16  
17 **Participants:** Between May and June 2019, we conducted a survey via an online panel in Singapore  
18 with 706 respondents.  
19

20  
21 **Results:** Our findings indicated common misconceptions surrounding antibiotic effectiveness and  
22 mechanisms of antibiotic resistance – most participants thought that resistance occurs when our  
23 bodies become resistant to antibiotics (62.5%) or when antibiotics become less powerful (48.5%). In  
24 multivariable analyses, better knowledge scores were associated with more favourable antibiotic  
25 attitudes ( $\beta = 0.29$ ; 95% CI: 0.20 – 0.37). In addition, more favourable attitude scores were associated  
26 with lower odds of both expecting (OR: 0.84, 95% CI: 0.72 – 0.99) and being prescribed antibiotics by  
27 a primary care doctor (OR: 0.76, 95% CI: 0.63- 0.90).  
28

29  
30 **Conclusions:** This study presents important information about population perceptions towards  
31 antibiotics and antibiotic resistance in Singapore. Results from this study emphasise the importance  
32 of effective public communication strategies to promote responsible antibiotic use locally and should  
33 be used to inform future implementation of programmes and activities as laid out in Singapore's  
34 National Strategic Action Plan on AMR.  
35

36  
37 Word count: 240

38  
39  
40 **Keywords:** antimicrobial resistance, antibiotic use, population survey,  
41  
42  
43  
44  
45  
46  
47  
48  
49  
50  
51  
52  
53  
54  
55  
56  
57  
58  
59  
60

### Strengths and limitations of this study

- This is the first population-level study on public knowledge, attitudes and practices of antibiotics and antibiotic resistance in Singapore. Findings from this study provide baseline information against which to measure the progress of future antibiotic interventions.
- A key strength of our online survey is increased access to groups and individuals in the community who may not have been reached through other channels.
- A potential limitation of our study is that respondents in online surveys may not be fully representative of the general population. In our study, we had an over-representation of respondents with at least a university education and those living in private accommodation. This may affect the generalisability of our results.
- In an online survey where the research team is unable to clarify or answer questions in-person, respondents may have misinterpreted questions especially relating to the mechanisms of antibiotic resistance.



## 1 Introduction

2 One of five key priority areas highlighted in the World Health Organization's Global Action Plan on  
3 Antimicrobial Resistance (AMR) is the improvement of overall public awareness of antibiotics and  
4 antimicrobial resistance to promote effective behavioural change population-level antibiotic use.<sup>1</sup>  
5 Research on the drivers of antibiotic use in several countries highlights widespread misconceptions  
6 among the public regarding appropriate use of antibiotics and the development of antibiotic  
7 resistance, showing that less antibiotic knowledge is often associated with unfavourable antibiotic use  
8 behaviours, such as self-medication with antibiotics or sharing leftover antibiotics with others.<sup>2</sup> These  
9 findings are supported by qualitative studies indicating that the general public is unfamiliar with  
10 technical terms such as "antimicrobial resistance", that they feel they "know" when they need  
11 antibiotics, and that antibiotic prescription is often viewed as a form of validation for their illness.<sup>3-5</sup>

12  
13 Singapore is a high-income, city state in Asia with a comprehensive system of hybrid public and  
14 private primary, secondary and tertiary health care. Currently, all antimicrobials for human use in the  
15 country are prescription-only medicines and regulated by the Health Sciences Authority (HSA), the  
16 national authority that enforces health product regulation and registration<sup>6</sup>. However, antibiotic  
17 resistance is an increasing concern not only in acute care hospitals<sup>7,8</sup> but also in the community<sup>9</sup>, an  
18 indicator of inappropriate antibiotic consumption. Although antibiotics can be obtained only via  
19 prescription by licensed healthcare professionals<sup>6</sup> in Singapore, patients seeking primary health care  
20 for upper respiratory tract infections are commonly misinformed about the role of antibiotics in the  
21 treatment of viral infections and often seek primary care expecting antibiotics from a medical  
22 professional<sup>10</sup>.

23  
24 The development of the WHO's Global Action Plan on AMR and subsequent national action plans<sup>11</sup>  
25 serves to complement existing strategies and to prioritise future AMR interventions in both healthcare  
26 institutions and the community in preserving antimicrobial effectiveness. To measure the progress of  
27 future interventions, as well as to yield evidence-based insights<sup>12</sup> into effective public communication  
28 strategies to promote responsible antibiotic use, we conducted an online population survey in  
29 Singapore to measure public perceptions of antibiotics and antibiotic resistance.

## 30 Methods

### 31 *Study design + data collection*

32 Survey respondents were participants in an online survey panel recruited and maintained by the  
33 Singapore Population Health Improvement Centre (SPHERiC) within the National University Health  
34 System. Members of the public are eligible to be part of the online survey panel if they are community-  
35 dwelling Singapore Citizens or Permanent Residents, aged 21 and above, English-literate, frequent  
36 users of web-based services and if they have a personal email account. Panel participants were  
37 recruited using two main strategies. The first strategy was a door-to-door approach conducted to recruit  
38 eligible community-dwelling Singaporeans and/or permanent residents. The second strategy involved  
39 mailing invitations to de-identified household addresses available from the Singapore Department of  
40 Statistics.

41  
42  
43 From 23 May to 1 June 2019, 1,001 SPHERiC panel members were invited to participate in the survey  
44 via an online link in an email or SMS notification. The survey was available to panel members for 10  
45 days and could be completed on any type of personal digital device (e.g. laptops, mobile phones). A  
46 reminder notification was sent to panel members who did not respond to the first notification within  
47 five days. The self-completed survey was administered in English using RedCap software<sup>13</sup> and took  
48 approximately 10-15 minutes to complete. Participants received a reimbursement of SGD5

1 (~USD3.70) for completing the survey. Survey data were provided by SPHERiC to the research team in an anonymised form for analysis.

#### *Survey questionnaire*

The questionnaire consisted of six sections, eliciting information from respondents about their sociodemographic characteristics (8 questions), knowledge about the effectiveness of antibiotics (5 questions), knowledge about the mechanisms of antibiotic resistance and the spread of antibiotic-resistant infections (12 questions), attitudes toward appropriate antibiotic use (9 questions), antibiotic practices in relation to the last time they had an acute respiratory illness (11 questions), as well as their healthcare seeking behaviours (17 questions) (**Appendix A**).

The questionnaire was developed by reviewing available questionnaires from previously published surveys<sup>14,15</sup>. Additionally, to enhance cross-country comparability, questions about antibiotic resistance were taken from the WHO country survey<sup>16</sup>. To ensure that questions in the survey were well understood and adapted to the local context, the questionnaire was field tested with 29 individuals over a period of six days.

#### *Ethics approval*

This study was approved by the institutional review board of the National University of Singapore (reference number: B-16-269).

#### *Data analysis*

We assessed representativeness of the survey sample by comparing respondents' sociodemographic characteristics with the Singapore Census of Population<sup>17</sup>. We then assessed respondents' general awareness toward antibiotics by tabulating variables related to antibiotic effectiveness, resistance and appropriate use. We also tabulated respondents' practices in relation to antibiotic use for common respiratory illnesses.

We assigned each respondent a knowledge and attitude score based on the number of correct or favorable responses in the respective sections (**Appendix B**). All knowledge and attitude questions had three response options: "Agree", "Disagree" or "Not sure". Correct knowledge and favourable attitude responses were assigned 1 point while incorrect or unfavourable responses scored 0 points.

Respondents' antibiotic practice responses during their last consultation with a primary care provider for acute respiratory illness were dichotomised into: 1) whether respondents expected antibiotics from their doctor (yes = 1; no = 0), 2) whether they asked their doctor for antibiotics (yes = 1; no = 0), and 3) whether they were prescribed antibiotics by their doctor (yes = 1; no = 0).

We first investigated the respective relationships between respondents' sociodemographic characteristics and their antibiotic knowledge and attitude scores using a multivariable linear (Gaussian) regression. Sociodemographic explanatory variables included age group, gender, housing type, household income, education, ethnicity and marital status.

In subsequent regression analyses, we investigated the association between antibiotic practices and antibiotic knowledge and attitudes scores using a multivariable linear (Gaussian) regression, controlling for sociodemographic variables. We then conducted separate multivariable logistic regressions to investigate whether respondents' attitudes scores were associated with each of the three antibiotic practices as outcome variables: 1) whether respondents expected antibiotics, 2) whether they asked for antibiotics and 3) whether they were prescribed antibiotics. We summarised

1  
2  
3 1 associations using adjusted odds ratios and corresponding 95% confidence intervals (CI). Regression  
4 2 residual distributions can be found in **Appendix C**.

5 3  
6 4 All data were analysed using R version 3.6.1.<sup>18</sup> No patients were involved

#### 7 5 8 6 *Patient and public involvement*

9 7 No patients were involved in the study. To inform the survey content, we pilot tested the survey with  
10 8 members of the public external to our research. Key findings will be disseminated to study  
11 9 respondents in an online newsletter.

### 12 10 13 11 **Results**

14 12 Of 1,001 eligible panel members, 706 (70.5%) completed the survey. Respondents had a median age  
15 13 of 44 years (range: 22 – 86 years). Four hundred (56.7%) respondents were female and 306 (43.3%)  
16 14 were male. Most respondents were married (60.8%) and had higher than secondary education  
17 15 (78.0%). The survey sample had a similar gender and ethnic group composition compared to the  
18 16 Singapore Census of Population<sup>17</sup> but had slightly lower proportions of individuals who lived in  
19 17 private housing (i.e. condominium, landed property) and a higher proportion of individuals with a  
20 18 university education (**Table 1**).

#### 21 19 22 20 *Descriptive analysis*

23 21 Tabulations and frequencies of the descriptive analysis are shown in **Table 2**.

#### 24 22 25 23 Awareness of antibiotic effectiveness

26 24  
27 25 Almost all the respondents (97.5%) had heard of the term “antibiotics” before. When asked if  
28 26 antibiotics were effective against bacterial infections and viral infections, only about a third of the  
29 27 respondents (35.6%) answered both questions correctly. A large proportion of respondents believed  
30 28 that antibiotics could help to speed up recovery from the common respiratory illness (35.4%), or  
31 29 alleviate serious symptoms associated with these illnesses (45.2%).

#### 32 30 33 31 Awareness of antibiotic resistance

34 32  
35 33 Among respondents, 60.5% reported having heard of the term “antibiotic resistance”, but only 11%  
36 34 had heard of the abbreviation “AMR”. About half of the respondents were aware that resistance occurs  
37 35 when bacteria become resistant to the antibiotics. However, many respondents also thought that  
38 36 resistance occurs when our bodies become resistant to antibiotics (62.5%) or when antibiotics  
39 37 become less powerful (48.5%).

40 38  
41 39 There was also lower awareness among respondents about how antibiotic-resistant infections could  
42 40 spread or affect common conditions. More than half (56.1%) either disagreed or were not sure that  
43 41 antibiotic resistance can affect the treatment of common infections such as sore throat and urinary  
44 42 tract infection. More than a third of respondents (39.7%) believed that their own use of antibiotics  
45 43 does not have any impact on other people’s chances of acquiring antibiotic-resistant infections, and  
46 44 that they do not have to worry about getting antibiotic-resistant infections as long as they use  
47 45 antibiotics appropriately themselves (44.5%). Overall, respondents agreed that interventions to  
48 46 reduce AMR include implementing better infection control measures in hospitals (76.2%) and using  
49 47 fewer antibiotics (71.9%), although a lower percentage recognized hand hygiene (61.7%) and  
50 48 vaccination (59.5%) as important interventions.

### Awareness on how to use antibiotics responsibly

There was generally high awareness about appropriate practices in sharing antibiotics – respondents generally agreed that it is inappropriate to share antibiotics with family and friends when they are sick with either same (84.3%) or different (92.4%) symptoms. Respondents were also reluctant to share antibiotics with their household pets – only 1% thought it was appropriate to do so.

Less than 10% of the respondents said that they felt comfortable keeping leftover antibiotics for future use. While over 90% of the respondents agreed that it is important to always finish the course of antibiotics prescribed, a small proportion of respondents believed that they do not have to finish a prescribed course of antibiotics when they feel better (7.9%) or when they have an alternative remedy (8.2%).

### Cold/flu practices

We asked all 706 respondents what they did the last time they had symptoms of the common cold or flu (**Figure 1**). More than half (50.6%) chose to see a doctor. The rest chose to take extra rest (59.0%), over-the-counter medication (39.9%), traditional Chinese medicine (12.4%) or did nothing about the symptoms (12.6%). Only 2.8% of respondents used leftover antibiotics (1.4%).

Of the 350 respondents who chose to see a doctor for their cold and flu symptoms, 12.6% expected an antibiotic prescription and 11.4% explicitly asked their doctor for antibiotics. Despite this, nearly half (49.7%) of the respondents who visited the doctor for cold or flu symptoms reported that their doctor prescribed them antibiotics, regardless of whether they asked for them explicitly or not.

For respondents who were prescribed antibiotics, 71.1% said that the doctor explained to them why they needed antibiotics, but only a minority stated that their doctor talked to them about possible side-effects of antibiotics (28.3%), or about antibiotic resistance (18.1%). For respondents who were not prescribed antibiotics, 44.6% of them said that the doctor explained why they did not need them.

### *Multivariable analysis*

#### Respondents' knowledge & attitude scores

Respondents' median knowledge score was 8 (range: 0 – 14) and median attitude score was 7 (range 0 – 11).

Compared to female respondents, males scored better in terms of antibiotic knowledge ( $\beta$ : 0.68; 95% CI – 0.15 – 1.22) but scored worse for attitudes ( $\beta$ : -0.40; 95% CI: -0.77 – -0.03). Malays had lower knowledge ( $\beta$ : -0.69; 95% CI: -1.81 – -0.43) and attitude scores ( $\beta$ : -1.04; 95% CI: -1.76 – -0.33) relative to their Chinese counterparts. Respondents with secondary education also scored lower for both knowledge ( $\beta$ : -1.64; 95% CI: -2.53 – -0.75) and attitudes ( $\beta$ : -1.16; 95% CI: -1.71 – -0.60) compared to respondents with a university education. Respondents in 3 room HDB (public housing) flat scored lower for both knowledge ( $\beta$ : -1.01; 95% CI: -1.90 – -0.13) and attitudes ( $\beta$ : -0.83; 95% CI: -1.42 – -0.24) compared to respondents in 5-room HDB and executive flats (**Table 3**).

Attitude scores increased by 0.29 (95% CI: 0.20 – 0.37) for every unit increase in antibiotic knowledge score (**Table 4**).

#### Respondents' knowledge & attitude scores with practice variables

1  
2  
3 1 We found that more favourable antibiotic attitude scores were associated with lower odds of  
4 2 expecting antibiotics (OR: 0.84, 95% CI: 0.72 – 0.99) per unit increase in score. Antibiotic knowledge  
5 3 and attitude scores were not associated with whether participants asked their doctors for antibiotics.  
6 4 However, higher scores on knowledge of antibiotic resistance (OR: 0.90, 95% CI: 0.79 – 1.05) and  
7 5 attitude (OR: 0.76, 95% CI: 0.63 – 0.90) were associated with lower odds of being prescribed  
8 6 antibiotics by the doctor (**Table 4**).  
9 7

## 11 8 **Discussion**

12 9 Our cross-sectional study of 706 participants in Singapore showed that there is a high level of  
13 10 awareness towards appropriate antibiotic use among the Singapore general population, but greater  
14 11 knowledge and awareness can be beneficial for curbing expectation and receipt of antibiotics during  
15 12 primary care consultations.  
16 13

17 14 While most of the respondents said that they had heard of the term antibiotics before, only about a  
18 15 third of the respondents could correctly identify that antibiotics are effective towards bacterial and  
19 16 not viral infections. Comparable to previously published surveys in other countries<sup>15,19,20</sup>, almost half  
20 17 of the respondents believed that antibiotics could be used for speeding up recovery or alleviating  
21 18 symptoms from conditions like the common cold and the flu, indicating knowledge gaps in the  
22 19 appropriate use of antibiotics.  
23 20

24 21 In terms of awareness of antibiotic resistance, only about a tenth of the respondents were able to  
25 22 correctly identify the mechanisms of resistance, suggesting a need for increased public education in  
26 23 this area. These misconceptions are also mirrored in other population-level antibiotic surveys<sup>21–23</sup> as  
27 24 well as the WHO multi-country antibiotic resistance public awareness survey in 12 countries.<sup>16</sup> Similar  
28 25 to our findings, a majority of respondents in all countries surveyed thought that antibiotic resistance  
29 26 occurs when our bodies become resistant to antibiotics, while approximately half of the respondents  
30 27 thought that antibiotic resistance is only a problem for people who take antibiotics regularly.  
31 28

32 29 Approximately half of the respondents went to a medical doctor when they experienced symptoms of  
33 30 the cold or flu, and a tenth of these respondents expressed that they explicitly asked for antibiotics.  
34 31 These results are congruent with a previously published study on Singaporean adult patients seeking  
35 32 medical care for upper respiratory tract infection symptoms, where a third of patients said that they  
36 33 would ask the doctor for antibiotics or see another doctor if antibiotics were not prescribed<sup>10</sup>. While  
37 34 the studies looked at different target populations, this could indicate favourable population-level  
38 35 changes in antibiotic seeking behaviours over time.  
39 36

40 37 While only a small proportion of respondents who sought care for their symptoms of the cold or flu  
41 38 said that they expected antibiotics, close to half of them left the clinic with antibiotics whether they  
42 39 asked for them or not. While respondents with higher attitude scores were less likely to expect  
43 40 antibiotics and to leave the clinic with an antibiotic prescription, this discrepancy between patient  
44 41 expectation and prescription is an indication of sub-optimal antibiotic prescribing. As respondents'  
45 42 antibiotic prescribing information was self-reported, we were unable to verify whether they actually  
46 43 received antibiotics, or if those who knew more about antibiotics were less likely to take any form of  
47 44 prescription. We also do not know from our study if there are significant differences in patient  
48 45 antibiotic seeking behaviours or clinician prescribing practices between public and private healthcare  
49 46 sectors. However, previous research in other countries indicates the effectiveness of potential  
50 47 strategies such as delayed prescription<sup>24,25</sup> and shared decision-making<sup>26,27</sup> to reduce inappropriate  
51 48 antibiotic use especially for acute respiratory infections. Additional strategies from other settings  
52 53  
54 55  
56 57  
58 59  
60



1  
2  
3 1 have also found that decreasing the frequency of medical consultations pertaining to respiratory  
4 2 illnesses were effective in reducing ambulatory antibiotic prescriptions<sup>28,29</sup>.

5 3  
6 4 These findings highlight the importance of disseminating clear information about antibiotics and  
7 5 antibiotic resistance to reduce public expectations surrounding antibiotic prescriptions. It also  
8 6 emphasizes the need to provide resources such as clinical practice guidelines on antibiotic use in acute  
9 7 upper respiratory infections<sup>30</sup>, accessible diagnostic tools in upskilling primary care healthcare  
10 8 professionals as well as more comprehensive policies to manage profit-making in antibiotic  
11 9 dispensation<sup>31,32</sup>. Further, while public campaign messages have focused on antibiotic effectiveness  
12 10 towards specific medical conditions<sup>12,28,33,34</sup>, our findings suggest that more should be done with  
13 11 regard to how people can use antibiotics more effectively and how health professionals can  
14 12 communicate that information. Future research should further explore where people usually get  
15 13 information about antibiotics and how this influences their antibiotic seeking behaviours.  
16 14 Additionally, follow-up population surveys using consistent methods and question structures can  
17 15 provide valuable insights into progress of future AMR interventions.

18 16  
19 17 A potential limitation of our study is that respondents in online surveys may not be fully  
20 18 representative of the general population. Although our survey sample was compared to the  
21 19 Singapore census population in terms of gender and ethnic group, there was a pronounced over-  
22 20 representation of respondents with at least a university education and those living in private  
23 21 accommodation. This may affect the generalisability of our results as these sociodemographic  
24 22 characteristics might be associated with greater awareness about health-related issues as well as  
25 23 knowledge relating to AMR<sup>35-37</sup>, as indicated in prior survey findings in similar contexts. Further,  
26 24 although preserving question structure enabled us to maintain comparability with WHO's multi-  
27 25 country antibiotic resistance public awareness survey, respondents may have misinterpreted  
28 26 questions relating to the mechanisms of antibiotic resistance, especially in an online survey where  
29 27 the research team is unable to clarify or answer questions in-person.

## 30 28 31 29 **Conclusion**

32 30 This is the first study on public knowledge, attitudes and practices of antibiotics and antibiotic  
33 31 resistance in Singapore, providing baseline information against which to measure the progress of  
34 32 future interventions. Results from this study serve to emphasise the importance of raising awareness  
35 33 surrounding effective antibiotic use, as well as the mechanisms of antibiotic resistance. They also  
36 34 highlight the benefit of clinical practice guidelines on antibiotic prescribing, educational resources and  
37 35 clinical diagnostic tools for providers. These recommendations should be used to inform future  
38 36 implementation of programmes and activities as laid out in Singapore's National Strategic Action Plan  
39 37 on Antimicrobial Resistance.

## 40 38 41 39 **Funding**

42 40 This work was funded by the Singapore Ministry of Health's National Medical Research Council under  
43 41 the Centre Grant Programme – Singapore Population Health Improvement Centre  
44 42 (NMRC/CG/C026/2017\_NUHS).

## 45 43 46 44 **Acknowledgements**

47 45 We thank the SPHS unit for their assistance in pre-testing and data management for the questionnaire  
48 46 fielded to the online panel.

## 49 47 50 48 **Authors' contributions**

1  
2  
3 1 All authors attest they meet the ICMJE criteria for authorship. JL, DMC and CCT conceived the research  
4 2 study and developed the questionnaire. JL and CCT analysed the data and drafted the manuscript. ARC  
5 3 and HLY provided critical feedback on the manuscript.  
6 4

7 4  
8 5 **Data availability statement**

9 6 All data relevant to the study are included in the article or uploaded as supplementary information.  
10 7

11 8 **Competing interests**

12 9 The authors declare that they have no competing interests.  
13 10

14 10  
15 11 **License statement**

16 12 I, the Submitting Author has the right to grant and does grant on behalf of all authors of the Work (as  
17 13 defined in the below author licence), an exclusive licence and/or a non-exclusive licence for  
18 14 contributions from authors who are: i) UK Crown employees; ii) where BMJ has agreed a CC-BY licence  
19 15 shall apply, and/or iii) in accordance with the terms applicable for US Federal Government officers or  
20 16 employees acting as part of their official duties; on a worldwide, perpetual, irrevocable, royalty-free  
21 17 basis to BMJ Publishing Group Ltd ("BMJ") its licensees and where the relevant Journal is co-owned  
22 18 by BMJ to the co-owners of the Journal, to publish the Work in BMJ Open and any other BMJ products  
23 19 and to exploit all rights, as set out in our licence.  
24 20

25 20  
26 21 The Submitting Author accepts and understands that any supply made under these terms is made by  
27 22 BMJ to the Submitting Author unless you are acting as an employee on behalf of your employer or a  
28 23 postgraduate student of an affiliated institution which is paying any applicable article publishing  
29 24 charge ("APC") for Open Access articles. Where the Submitting Author wishes to make the Work  
30 25 available on an Open Access basis (and intends to pay the relevant APC), the terms of reuse of such  
31 26 Open Access shall be governed by a Creative Commons licence – details of these licences and  
32 27 which Creative Commons licence will apply to this Work are set out in our licence referred to above.  
33 28

34 28  
35 29 **Figure caption**

36 29  
37 30 Figure 1. Participants' cold/flu practices  
38  
39  
40  
41  
42  
43  
44  
45  
46  
47  
48  
49  
50  
51  
52  
53  
54  
55  
56  
57  
58  
59  
60

## References

- 1 Global action plan on antimicrobial resistance. 2015. <https://apps.who.int/iris/handle/10665/193736>.
- 2 Jamhour A, El-Kheir A, Salameh P, Abi Hanna P, Mansour H. Antibiotic knowledge and self-medication practices in a developing country: A cross-sectional study. *American journal of infection control* 2017; **45**: 384–8.
- 3 Gaarslev C, Yee M, Chan G, Fletcher-Lartey S, Khan R. A mixed methods study to understand patient expectations for antibiotics for an upper respiratory tract infection. *Antimicrobial Resistance & Infection Control* 2016; **5**: 39.
- 4 Davis ME, Liu T-L, Taylor YJ, *et al*. Exploring patient awareness and perceptions of the appropriate use of antibiotics: a mixed-methods study. *Antibiotics* 2017; **6**: 23.
- 5 Torres NF, Solomon VP, Middleton LE. Patterns of self-medication with antibiotics in Maputo City: a qualitative study. *Antimicrobial Resistance & Infection Control* 2019; **8**: 161.
- 6 Health Products (Therapeutic Products) Regulations 2016. <https://sso.agc.gov.sg/SL/HPA2007-S329-2016> (accessed Sept 15, 2020).
- 7 Hsu L-Y, Tan T-Y, Jureen R, *et al*. Antimicrobial drug resistance in Singapore hospitals. *Emerging infectious diseases* 2007; **13**: 1944.
- 8 Cai Y, Venkatachalam I, Tee NW, *et al*. Prevalence of healthcare-associated infections and antimicrobial use among adult inpatients in Singapore acute-care hospitals: results from the first national point prevalence survey. *Clinical Infectious Diseases* 2017; **64**: S61–7.
- 9 Shankar N, Chow ALP, Oon J, *et al*. The epidemiology and transmission of methicillin-resistant *Staphylococcus aureus* in the community in Singapore: study protocol for a longitudinal household study. *BMC infectious diseases* 2017; **17**: 678.
- 10 Pan DST, Huang JH, Lee MHM, *et al*. Knowledge, attitudes and practices towards antibiotic use in upper respiratory tract infections among patients seeking primary health care in Singapore. *BMC family practice* 2016; **17**: 148.
- 11 National Strategic Action Plan on Antimicrobial Resistance, Singapore. 2017.
- 12 Huttner B, Saam M, Moja L, *et al*. How to improve antibiotic awareness campaigns: findings of a WHO global survey. *BMJ global health* 2019; **4**: e001239.
- 13 Harris PA, Taylor R, Minor BL, *et al*. The REDCap consortium: Building an international community of software platform partners. *Journal of biomedical informatics* 2019; **95**: 103208.
- 14 André M, Vernby Å, Berg J, Lundborg CS. A survey of public knowledge and awareness related to antibiotic use and resistance in Sweden. *Journal of Antimicrobial chemotherapy* 2010; **65**: 1292–6.
- 15 You JHS, Yau B, Choi KC, Chau CTS, Huang QR, Lee SS. Public knowledge, attitudes and behavior on antibiotic use: a telephone survey in Hong Kong. *Infection* 2008; **36**: 153–7.
- 16 Multi-country public awareness survey. 2015.
- 17 Statistics D of. Singapore Census of Population 2010: Statistical Release 1: Demographic Characteristics, education, language and religion. Singapore Government, 2011.



1  
2  
3  
4  
5  
6  
7  
8  
9  
10  
11  
12  
13  
14  
15  
16  
17  
18  
19  
20  
21  
22  
23  
24  
25  
26  
27  
28  
29  
30  
31  
32  
33  
34  
35  
36  
37  
38  
39  
40  
41  
42  
43  
44  
45  
46  
47  
48  
49  
50  
51  
52  
53  
54  
55  
56  
57  
58  
59  
60

- 18 RStudio Team. RStudio: Integrated Development for R. Boston, MA: RStudio, Inc., 2015  
<http://www.rstudio.com/>.
- 19 Chan GC, Tang SF. Parental knowledge, attitudes and antibiotic use for acute upper respiratory tract infection in children attending a primary healthcare clinic in Malaysia. *Malaysian Family Physician* 2012; **2**: 5.
- 20 Chanvatik S, Kosiyaporn H, Lekagul A, *et al*. Knowledge and use of antibiotics in Thailand: A 2017 national household survey. *PloS one* 2019; **14**: e0220990.
- 21 Lim JM, Chhoun P, Tuot S, *et al*. Public knowledge, attitudes and practices surrounding antibiotic use and resistance in Cambodia. *JAC-Antimicrobial Resistance* 2021; **3**: dlaa115.
- 22 Aslam A, Gajdács M, Zin CS, Binti Abd Rahman NS, Ahmed SI, Jamshed SQ. Public awareness and practices towards self-medication with antibiotics among the Malaysian population. A development of questionnaire and pilot-testing. *Antibiotics* 2020; **9**: 97.
- 23 Tsuzuki S, Fujitsuka N, Horiuchi K, *et al*. Factors associated with sufficient knowledge of antibiotics and antimicrobial resistance in the Japanese general population. *Scientific reports* 2020; **10**: 1–9.
- 24 Little P, Moore M, Kelly J, *et al*. Delayed antibiotic prescribing strategies for respiratory tract infections in primary care: pragmatic, factorial, randomised controlled trial. *Bmj* 2014; **348**: g1606.
- 25 Spurling GK, Del Mar CB, Dooley L, Foxlee R, Farley R. Delayed antibiotic prescriptions for respiratory infections. *Cochrane Database of Systematic Reviews* 2017.
- 26 Coxeter P, Del Mar CB, McGregor L, Beller EM, Hoffmann TC. Interventions to facilitate shared decision making to address antibiotic use for acute respiratory infections in primary care. *Cochrane Database of Systematic Reviews* 2015.
- 27 Légaré F, Labrecque M, Cauchon M, Castel J, Turcotte S, Grimshaw J. Training family physicians in shared decision-making to reduce the overuse of antibiotics in acute respiratory infections: a cluster randomized trial. *Cmaj* 2012; **184**: E726–34.
- 28 Chahwakilian P, Huttner B, Schlemmer B, Harbarth S. Impact of the French campaign to reduce inappropriate ambulatory antibiotic use on the prescription and consultation rates for respiratory tract infections. *Journal of antimicrobial chemotherapy* 2011; **66**: 2872–9.
- 29 Gulliford M, Latinovic R, Charlton J, Little P, van Staa T, Ashworth M. Selective decrease in consultations and antibiotic prescribing for acute respiratory tract infections in UK primary care up to 2006. *Journal of public health* 2009; **31**: 512–20.
- 30 Lee T-H, Wong JG, Lye DC, *et al*. Medical and psychosocial factors associated with antibiotic prescribing in primary care: survey questionnaire and factor analysis. *British Journal of General Practice* 2017; **67**: e168–77.
- 31 Singh SR, Chua AQ, Tan ST, Tam CC, Hsu LY, Legido-Quigley H. Combating antimicrobial resistance in Singapore: a qualitative study exploring the policy context, challenges, facilitators, and proposed strategies. *Antibiotics* 2019; **8**: 201.
- 32 Chua AQ, Kwa AL-H, Tan TY, Legido-Quigley H, Hsu LY. Ten-year narrative review on antimicrobial resistance in Singapore. *Singapore medical journal* 2019; **60**: 387.

- 1  
2  
3 1 33 Al Omari S, Al Mir H, Wrayde S, *et al.* First Lebanese Antibiotic Awareness Week campaign:  
4 2 knowledge, attitudes and practices towards antibiotics. *Journal of Hospital Infection* 2019; **101**:  
5 3 475–9.  
6  
7 4 34 Saam M, Huttner B, Harbarth S, Organization WH. Evaluation of antibiotic awareness campaigns.  
8 5 *Geneva, Switzerland: WHO Collaborating Centre on Patient Safety* 2017.  
9  
10 6 35 Adekanmbi V, Jones H, Farewell D, Francis NA. Antibiotic use and deprivation: An analysis of  
11 7 Welsh primary care antibiotic prescribing data by socioeconomic status. *Journal of Antimicrobial*  
12 8 *Chemotherapy* 2020; **75**: 2363–71.  
13  
14 9 36 Thomson K, Berry R, Robinson T, Brown H, Bamba C, Todd A. An examination of trends in  
15 10 antibiotic prescribing in primary care and the association with area-level deprivation in England.  
16 11 *BMC Public Health* 2020; **20**: 1–9.  
17  
18 12 37 Covvey JR, Johnson BF, Elliott V, Malcolm W, Mullen AB. An association between socioeconomic  
19 13 deprivation and primary care antibiotic prescribing in Scotland. *Journal of Antimicrobial*  
20 14 *Chemotherapy* 2014; **69**: 835–41.  
21  
22  
23  
24  
25  
26  
27  
28  
29  
30  
31  
32  
33  
34  
35  
36  
37  
38  
39  
40  
41  
42  
43  
44  
45  
46  
47  
48  
49  
50  
51  
52  
53  
54  
55  
56  
57  
58  
59  
60

**Table 1** Demographic and socioeconomic characteristics of survey participants compared with Singapore Census of Population (2010)

|                                      | <b>Survey respondents<br/>n (%)</b> | <b>Census (2010)<br/>(%)</b> |
|--------------------------------------|-------------------------------------|------------------------------|
| <b>Gender</b>                        |                                     |                              |
| Male                                 | 306 (43.3)                          | 49.3                         |
| Female                               | 400 (56.7)                          | 50.7                         |
| <b>Age</b>                           |                                     |                              |
| Median age                           | 44                                  | 37.4                         |
| <b>Ethnicity</b>                     |                                     |                              |
| Chinese                              | 549 (77.8)                          | 74.1                         |
| Malay                                | 82 (11.6)                           | 13.4                         |
| Indian                               | 51 (7.2)                            | 9.2                          |
| Other                                | 24 (3.4)                            | 3.3                          |
| <b>Education</b>                     |                                     |                              |
| Below secondary                      | 13 (1.8)                            | 32.4                         |
| Secondary                            | 138 (19.5)                          | 18.9                         |
| Post-secondary                       | 243 (34.5)                          | 11.1                         |
| Diploma & Professional qualification |                                     | 14.8                         |
| University                           | 308 (43.6)                          | 11.7                         |
| Prefer not to say                    | 4 (0.6)                             | -                            |
| <b>Housing</b>                       |                                     |                              |
| 1-2 room                             | 19 (2.7)                            | 2.1                          |
| 3-4 room                             | 393 (55.7)                          | 38.1                         |
| 5-room & Exec                        | 247 (35.0)                          | 21.5                         |
| Private housing                      | 36 (5.1)                            | 36.5                         |
| Others                               | 11(1.5)                             | 1.4                          |
| <b>Household income</b>              |                                     |                              |
| < \$2,000                            | 81 (11.5)                           | 21                           |
| \$2,000 - \$3,999                    | 148 (21.0)                          | 16.5                         |
| \$4,000 - \$5,999                    | 141 (20.0)                          | 15.3                         |
| \$5,000 - \$9,999                    | 178 (25.2)                          | 21.7                         |
| \$10,000 +                           | 79 (11.2)                           | 25.5                         |
| Do not know                          | 35 (5.0)                            | -                            |
| Prefer not to say                    | 44 (6.1)                            | -                            |

**Table 2** Participants' responses on antibiotic knowledge, attitudes and antibiotic resistance

| <b>Antibiotic knowledge</b>                                                                           | <b>Response</b> | <b>n = 706</b><br>n (%) |
|-------------------------------------------------------------------------------------------------------|-----------------|-------------------------|
| Have you ever heard of a type of medication called 'antibiotics'?                                     | Yes             | 688 (97.5)              |
|                                                                                                       | No              | 18 (2.5)                |
|                                                                                                       |                 | <b>n = 688</b><br>n (%) |
| Antibiotics can help me recover from bacterial infections                                             | Agree           | 574 (83.4)              |
|                                                                                                       | Disagree        | 43 (6.2)                |
|                                                                                                       | Not sure        | 71 (10.3)               |
| Antibiotics can help me recover from viral infections                                                 | Agree           | 314 (45.6)              |
|                                                                                                       | Disagree        | 266 (38.7)              |
|                                                                                                       | Not sure        | 108 (15.7)              |
| Antibiotics can help me recover from the common cold and flu                                          | Agree           | 228 (33.1)              |
|                                                                                                       | Disagree        | 364 (52.9)              |
|                                                                                                       | Not sure        | 96 (14.0)               |
| Antibiotics can help me recover from serious symptoms of cold and flu                                 | Agree           | 319 (46.4)              |
|                                                                                                       | Disagree        | 256 (37.2)              |
|                                                                                                       | Not sure        | 113 (16.4)              |
| Antibiotics can speed up my recovery from the common cold and flu                                     | Agree           | 250 (36.3)              |
|                                                                                                       | Disagree        | 315 (45.8)              |
|                                                                                                       | Not sure        | 123 (17.9)              |
|                                                                                                       |                 |                         |
| <b>Antibiotic attitudes</b>                                                                           | <b>Response</b> | <b>n = 688</b><br>n (%) |
| It is okay to share my antibiotics with family and friends when they are sick with the same symptoms  | Agree           | 50 (7.3)                |
|                                                                                                       | Disagree        | 595 (86.5)              |
|                                                                                                       | Not sure        | 43 (6.2)                |
| It is okay to share my antibiotics with family and friends when they are sick with different symptoms | Agree           | 9 (1.3)                 |
|                                                                                                       | Disagree        | 652 (94.8)              |
|                                                                                                       | Not sure        | 27 (9.3)                |
| It is okay to share my antibiotics with my pets when they are sick                                    | Agree           | 7 (1.0)                 |
|                                                                                                       | Disagree        | 661 (96.1)              |
|                                                                                                       | Not sure        | 20 (2.9)                |
| It is okay to keep leftover antibiotics and use them again when I fall sick in the future             | Agree           | 39 (5.7)                |
|                                                                                                       | Disagree        | 604 (87.8)              |
|                                                                                                       | Not sure        | 45 (6.5)                |
| It is okay for me to use my leftover antibiotics when I have the same symptoms as before              | Agree           | 59 (8.6)                |
|                                                                                                       | Disagree        | 590 (85.8)              |
|                                                                                                       | Not sure        | 39 (5.7)                |
| It is important to always finish the course of antibiotics prescribed to me                           | Agree           | 642 (93.3)              |
|                                                                                                       | Disagree        | 28 (4.1)                |
|                                                                                                       | Not sure        | 18 (2.6)                |
| It is okay not to finish the course of antibiotics prescribed to me when I feel better                | Agree           | 56 (8.4)                |
|                                                                                                       | Disagree        | 592 (86.0)              |
|                                                                                                       | Not sure        | 67 (9.7)                |
| It is okay not to finish the course of antibiotics prescribed to me when I have an alternative remedy | Agree           | 58 (8.4)                |
|                                                                                                       | Disagree        | 563 (81.8)              |
|                                                                                                       | Not sure        | 67 (9.7)                |
| It is okay to miss a dose during the course of                                                        | Agree           | 139 (20.2)              |

|                                                                                                                   |                 |                         |
|-------------------------------------------------------------------------------------------------------------------|-----------------|-------------------------|
| antibiotics prescribed to me                                                                                      | Disagree        | 433 (62.9)              |
|                                                                                                                   | Not sure        | 116 (16.9)              |
| <b>Antibiotic resistance knowledge</b>                                                                            |                 |                         |
|                                                                                                                   | <b>Response</b> | <b>n = 706</b><br>n (%) |
| Have you ever heard of the abbreviation 'AMR'?                                                                    | Yes             | 78 (11.0)               |
|                                                                                                                   | No              | 628 (89.0)              |
| Have you ever heard of the term 'antibiotic resistance'?                                                          | Yes             | 427 (60.5)              |
|                                                                                                                   | No              | 279 (39.5)              |
|                                                                                                                   |                 | <b>n = 427</b><br>n (%) |
| Antibiotic resistance occurs when antibiotics become less powerful so they don't work as well                     | Agree           | 207 (48.5)              |
|                                                                                                                   | Disagree        | 177 (41.4)              |
|                                                                                                                   | Not sure        | 43 (10.1)               |
| Antibiotic resistance occurs when your body becomes resistant to the antibiotics and they no longer work as well  | Agree           | 266 (62.3)              |
|                                                                                                                   | Disagree        | 127 (29.7)              |
|                                                                                                                   | Not sure        | 34 (8.0)                |
| Antibiotic resistance occurs when bacteria become resistant to the antibiotics so they are more difficult to kill | Agree           | 382 (89.5)              |
|                                                                                                                   | Disagree        | 18 (4.2)                |
|                                                                                                                   | Not sure        | 27 (6.3)                |
| Antibiotic resistance only affects people with serious infections in hospitals                                    | Agree           | 31 (7.3)                |
|                                                                                                                   | Disagree        | 334 (78.2)              |
|                                                                                                                   | Not sure        | 62 (14.5)               |
| Antibiotic resistance affects common infections such as sore throats and urinary tract infections                 | Agree           | 188 (44.0)              |
|                                                                                                                   | Disagree        | 100 (23.4)              |
|                                                                                                                   | Not sure        | 139 (32.6)              |
| If I use antibiotics appropriately, I don't have to worry about getting antibiotic resistant infections           | Agree           | 190 (44.5)              |
|                                                                                                                   | Disagree        | 141 (33.0)              |
|                                                                                                                   | Not sure        | 96 (22.5)               |
| How other people use antibiotics doesn't affect my chance of getting antibiotic resistant infections              | Agree           | 157 (36.8)              |
|                                                                                                                   | Disagree        | 183 (42.9)              |
|                                                                                                                   | Not sure        | 87 (20.4)               |
| How I use antibiotics doesn't affect other's peoples' chances of getting antibiotic resistant infections          | Agree           | 169 (39.6)              |
|                                                                                                                   | Disagree        | 176 (41.2)              |
|                                                                                                                   | Not sure        | 82 (19.2)               |

**Table 3** Univariate analysis: Participant characteristics associated with knowledge and attitude scores

|                                                                                             | Knowledge score |                           | Attitude score            |               |
|---------------------------------------------------------------------------------------------|-----------------|---------------------------|---------------------------|---------------|
|                                                                                             | Coefficient     | 95% CI                    | Coefficient               | 95% CI        |
| Estimate                                                                                    | 10.99           | 7.80 – 11.35              | 8.19                      | 6.99 – 9.38   |
| <b>Sex</b>                                                                                  |                 |                           |                           |               |
| Female <sup>#</sup>                                                                         |                 |                           |                           |               |
| Male                                                                                        | 0.68*           | 0.15 – 1.22               | -0.40*                    | -0.77 – -0.03 |
| <b>Ethnicity</b>                                                                            |                 |                           |                           |               |
| Chinese <sup>#</sup>                                                                        |                 |                           |                           |               |
| Malay                                                                                       | -0.69           | -1.81 – -0.43             | -1.04**                   | -1.76 – -0.33 |
| Indian                                                                                      | 0.23            | -0.62 – 1.08              | -0.32                     | -0.89 – 0.25  |
| Other                                                                                       | -0.13           | -1.61 – 1.35              | 0.25                      | -0.73 – 1.22  |
| <b>Age</b>                                                                                  | -0.03*          | -0.06 – -0.01             | 0.01                      | -0.00 – 0.03  |
| <b>Education</b>                                                                            |                 |                           |                           |               |
| University <sup>#</sup>                                                                     |                 |                           |                           |               |
| Primary (PSLE)                                                                              | -0.47           | -4.48 – 3.53              | -1.10                     | -3.06 – 0.86  |
| Secondary ('O'/'N' Level)                                                                   | -1.64***        | -2.53 – -0.75             | -1.16***                  | -1.71 – -0.60 |
| 'A' Level/Polytechnic/Diploma                                                               | 0.33            | -0.26 – 0.94              | -0.50*                    | -0.94 – -0.06 |
| ITE/NTC                                                                                     | 0.06            | -1.92 – 2.04              | -0.13                     | -1.17 – 0.91  |
| <b>Housing</b>                                                                              |                 |                           |                           |               |
| 5 – room HDB/executive flat <sup>#</sup>                                                    |                 |                           |                           |               |
| 1 – 2 room HDB <sup>+</sup>                                                                 | 0.23            | -2.13 – 2.59              | -0.59                     | -1.79 – 0.62  |
| 3 – room HDB                                                                                | -1.01*          | -1.90 – -0.13             | -0.83**                   | -1.42 – -0.24 |
| 4 – room HDB                                                                                | -0.24           | -0.81 – 0.34              | -0.37                     | -0.78 – 0.05  |
| Condominium                                                                                 | 0.22            | -1.13 – 1.56              | -0.56                     | -1.56 – 0.44  |
| Landed house                                                                                | -1.02           | -2.79 – 0.74              | 0.78                      | -0.73 – 2.28  |
| <b>Income</b>                                                                               |                 |                           |                           |               |
| < \$2000 <sup>#</sup>                                                                       |                 |                           |                           |               |
| \$2000 - \$3999                                                                             | -0.80           | -1.91 – 0.31              | -0.26                     | -0.95 – 0.42  |
| \$4000 - \$5999                                                                             | -0.49           | -1.63 – 0.65              | -0.24                     | -0.95 – 0.48  |
| \$6000 - \$10000                                                                            | -0.21           | -1.35 – 0.94              | -0.12                     | -0.84 – 0.60  |
| > \$10000                                                                                   | 0.40            | -0.83 – 1.62              | -0.17                     | -1.01 – 0.68  |
| <b>Marital status</b>                                                                       |                 |                           |                           |               |
| Married <sup>#</sup>                                                                        |                 |                           |                           |               |
| Divorced                                                                                    | -0.34           | -1.97 – 1.29              | 0.04                      | -0.88 – 0.96  |
| Never married                                                                               | 0.23            | -0.44 – 0.91              | -0.32                     | -0.79 – 0.14  |
| Widowed                                                                                     | -0.71           | -3.50 – 2.19              | -0.34                     | -1.95 – 1.29  |
| Separated but not divorced                                                                  | 2.02            | -1.80 – 5.83              | 0.85                      | -1.85 – 3.56  |
|                                                                                             |                 | Adjusted R-squared = 0.12 | Adjusted R-squared = 0.05 |               |
| #Reference groups                                                                           |                 |                           |                           |               |
| *p ≤ 0.05, **p ≤ 0.01, ***p ≤ 0.001                                                         |                 |                           |                           |               |
| <sup>+</sup> Public housing in Singapore managed by the Housing and Development Board (HDB) |                 |                           |                           |               |

**Table 4** Multivariable regression analysis

|                 | Multivariable linear regression |               | Multivariable logistic regression |               |                              |               |                               |               |
|-----------------|---------------------------------|---------------|-----------------------------------|---------------|------------------------------|---------------|-------------------------------|---------------|
|                 | <b>Attitudes</b>                |               | <b>Expected antibiotics</b>       |               | <b>Asked for antibiotics</b> |               | <b>Prescribed antibiotics</b> |               |
|                 | <b>Coefficient</b>              | <b>95% CI</b> | <b>OR</b>                         | <b>95% CI</b> | <b>OR</b>                    | <b>95% CI</b> | <b>OR</b>                     | <b>95% CI</b> |
| Estimate        | 7.49                            | 5.80 – 9.18   | -                                 | -             | -                            | -             | -                             | -             |
| Knowledge score | 0.29***                         | 0.20 – 0.37   | 0.90                              | 0.77 – 1.04   | 0.96                         | 0.79 – 1.16   | 0.90                          | 0.79 – 1.05   |
| Attitude score  | -                               | -             | 0.84*                             | 0.72 – 0.99   | 0.78                         | 0.71 – 1.07   | 0.76                          | 0.63 – 0.90   |

All regression results are adjusted for sociodemographic variables (i.e. gender, income, housing, education, ethnicity, marital status and age)

\*p ≤ 0.05, \*\*p ≤ 0.01, \*\*\*p ≤ 0.001

1  
2  
3  
4  
5  
6  
7  
8  
9  
10  
11  
12  
13  
14  
15  
16  
17  
18  
19  
20  
21  
22  
23  
24  
25  
26  
27  
28  
29  
30  
31  
32  
33  
34  
35  
36  
37  
38  
39  
40  
41  
42  
43  
44  
45  
46  
47  
48  
49  
50  
51  
52  
53  
54  
55  
56  
57  
58  
59  
60

For peer review only



1  
2  
3  
4  
5  
6  
7  
8  
9  
10  
11  
12  
13  
14  
15  
16  
17  
18  
19  
20  
21  
22  
23  
24  
25  
26  
27  
28  
29  
30  
31  
32  
33  
34  
35  
36  
37  
38  
39  
40  
41  
42  
43  
44  
45  
46  
47  
48  
49  
50  
51  
52  
53  
54  
55  
56  
57  
58  
59  
60

For peer review only

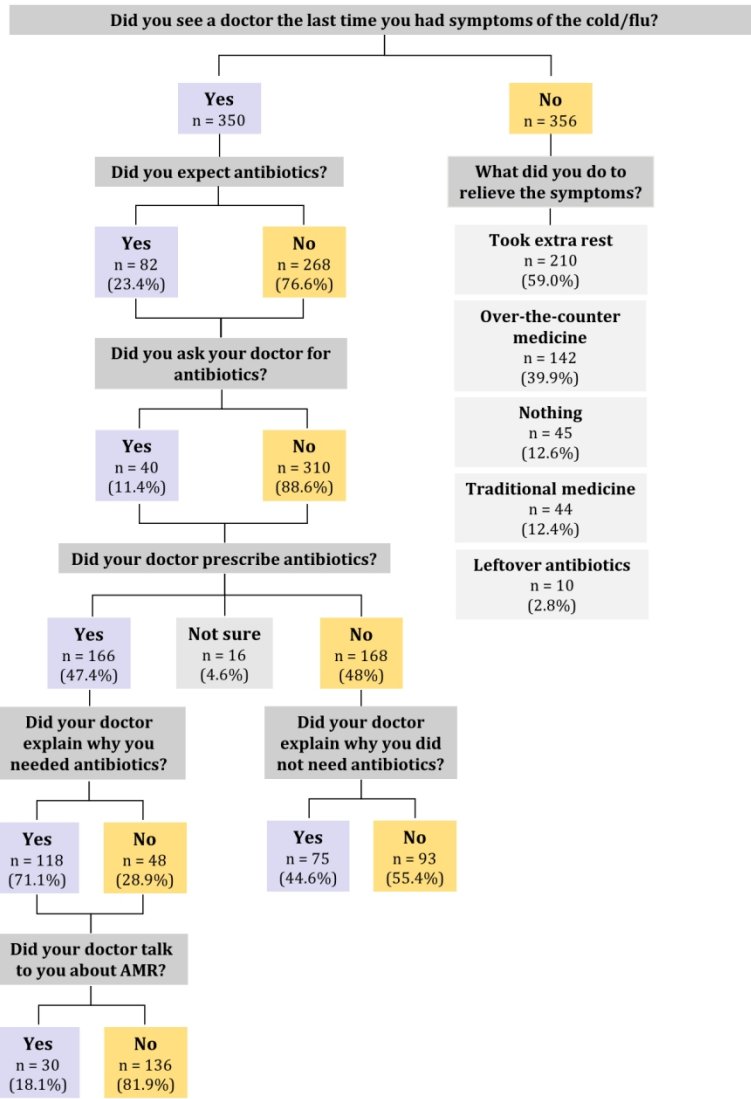

Figure 1 Participants' cold/flu practices

Figure 1: Participants' cold/flu practices

Survey title: A survey of knowledge, attitudes and practices surrounding antibiotics and vaccines in Singapore

Section 1 - Knowledge and attitudes regarding antibiotics

| First, I'd like to ask you some questions about antibiotic medications                                                                       |                                                                                                                                                                                                                                                                                                 |                                                                                                          |
|----------------------------------------------------------------------------------------------------------------------------------------------|-------------------------------------------------------------------------------------------------------------------------------------------------------------------------------------------------------------------------------------------------------------------------------------------------|----------------------------------------------------------------------------------------------------------|
| 1.1                                                                                                                                          | <p>Have you ever heard of a type of medication called 'antibiotics'?</p> <p><i>If necessary, prompt: "Antibiotics are a type of medication used to treat certain types of infections. Some examples of antibiotics are Augmentin, Zithromax, amoxicillin, clarithromycin, streptomycin"</i></p> | <input type="checkbox"/> Yes (go to 1.2)<br><input type="checkbox"/> No (go to Section 2)                |
| Now I will tell you a few statements regarding antibiotics. For each statement, please let me know if you <b>agree, disagree or not sure</b> |                                                                                                                                                                                                                                                                                                 |                                                                                                          |
| 1.2                                                                                                                                          | Antibiotics can help you recover from bacterial infections                                                                                                                                                                                                                                      | <input type="checkbox"/> Agree<br><input type="checkbox"/> Disagree<br><input type="checkbox"/> Not sure |
| 1.3                                                                                                                                          | Antibiotics can help you recover from viral infections                                                                                                                                                                                                                                          | <input type="checkbox"/> Agree<br><input type="checkbox"/> Disagree<br><input type="checkbox"/> Not sure |
| 1.4                                                                                                                                          | Antibiotics can help you recover from the common cold and flu                                                                                                                                                                                                                                   | <input type="checkbox"/> Agree<br><input type="checkbox"/> Disagree<br><input type="checkbox"/> Not sure |
| 1.5                                                                                                                                          | Antibiotics can help you recover from serious symptoms of cold and flu                                                                                                                                                                                                                          | <input type="checkbox"/> Agree<br><input type="checkbox"/> Disagree<br><input type="checkbox"/> Not sure |
| 1.6                                                                                                                                          | Antibiotics can speed up your recovery from the common cold and flu                                                                                                                                                                                                                             | <input type="checkbox"/> Agree<br><input type="checkbox"/> Disagree<br><input type="checkbox"/> Not sure |
| 1.7                                                                                                                                          | It is okay to share my antibiotics with family and friends when they are sick with the same symptoms                                                                                                                                                                                            | <input type="checkbox"/> Agree<br><input type="checkbox"/> Disagree<br><input type="checkbox"/> Not sure |
| 1.8                                                                                                                                          | It is okay to share my antibiotics with family and friends when they are sick with different symptoms                                                                                                                                                                                           | <input type="checkbox"/> Agree<br><input type="checkbox"/> Disagree<br><input type="checkbox"/> Not sure |
| 1.9                                                                                                                                          | It is okay to share my antibiotics with my pets when they are sick                                                                                                                                                                                                                              | <input type="checkbox"/> Agree<br><input type="checkbox"/> Disagree<br><input type="checkbox"/> Not sure |
| 1.10                                                                                                                                         | It is okay to keep leftover antibiotics and use them again when I fall sick in the future                                                                                                                                                                                                       | <input type="checkbox"/> Agree<br><input type="checkbox"/> Disagree<br><input type="checkbox"/> Not sure |

|      |                                                                                                       |                                                                                                          |
|------|-------------------------------------------------------------------------------------------------------|----------------------------------------------------------------------------------------------------------|
| 1.11 | It is okay for me to use my leftover antibiotics when I have the same symptoms as before              | <input type="checkbox"/> Agree<br><input type="checkbox"/> Disagree<br><input type="checkbox"/> Not sure |
| 1.12 | It is important to always finish the course of antibiotics prescribed to me                           | <input type="checkbox"/> Agree<br><input type="checkbox"/> Disagree<br><input type="checkbox"/> Not sure |
| 1.13 | It is okay not to finish the course of antibiotics prescribed to me when I feel better                | <input type="checkbox"/> Agree<br><input type="checkbox"/> Disagree<br><input type="checkbox"/> Not sure |
| 1.14 | It is okay not to finish the course of antibiotics prescribed to me when I have an alternative remedy | <input type="checkbox"/> Agree<br><input type="checkbox"/> Disagree<br><input type="checkbox"/> Not sure |
| 1.15 | It is okay to miss a dose during the course of antibiotics prescribed to me                           | <input type="checkbox"/> Agree<br><input type="checkbox"/> Disagree<br><input type="checkbox"/> Not sure |

## Section 2 - Knowledge and attitude regarding antibiotic resistance

|                                                                                                                                    |                                                                                                                   |                                                                                                          |
|------------------------------------------------------------------------------------------------------------------------------------|-------------------------------------------------------------------------------------------------------------------|----------------------------------------------------------------------------------------------------------|
| <i>Thanks a lot. We will now move on to questions about antibiotic resistance.</i>                                                 |                                                                                                                   |                                                                                                          |
| 2.1                                                                                                                                | Have you ever heard of the term 'antibiotic resistance'?                                                          | <input type="checkbox"/> Yes (go to 2.2)<br><input type="checkbox"/> No (go to Section 3)                |
| <i>I will now state a few statements regarding antibiotic resistance. Please tell me if you <b>agree, disagree or not sure</b></i> |                                                                                                                   |                                                                                                          |
| 2.2                                                                                                                                | Antibiotic resistance occurs when antibiotics become less powerful so they don't work as well                     | <input type="checkbox"/> Agree<br><input type="checkbox"/> Disagree<br><input type="checkbox"/> Not sure |
| 2.3                                                                                                                                | Antibiotic resistance occurs when your body becomes resistant to the antibiotics and they no longer work as well  | <input type="checkbox"/> Agree<br><input type="checkbox"/> Disagree<br><input type="checkbox"/> Not sure |
| 2.4                                                                                                                                | Antibiotic resistance occurs when bacteria become resistant to the antibiotics so they are more difficult to kill | <input type="checkbox"/> Agree<br><input type="checkbox"/> Disagree<br><input type="checkbox"/> Not sure |
| 2.5                                                                                                                                | If I use antibiotics appropriately, I don't have to worry about getting antibiotic resistant infections           | <input type="checkbox"/> Agree<br><input type="checkbox"/> Disagree<br><input type="checkbox"/> Not sure |
| 2.6                                                                                                                                | How other people use antibiotics doesn't affect my chance of getting antibiotic resistant infections.             | <input type="checkbox"/> Agree<br><input type="checkbox"/> Disagree<br><input type="checkbox"/> Not sure |
| 2.7                                                                                                                                | How I use antibiotic doesn't affect other people's chance of getting antibiotic resistant infections              | <input type="checkbox"/> Agree<br><input type="checkbox"/> Disagree<br><input type="checkbox"/> Not sure |

1  
2  
3  
4  
5  
6  
7  
8  
9  
10  
11  
12  
13  
14  
15  
16  
17  
18  
19  
20  
21  
22  
23  
24  
25  
26  
27  
28  
29  
30  
31  
32  
33  
34  
35  
36  
37  
38  
39  
40  
41  
42  
43  
44  
45  
46  
47  
48  
49  
50  
51  
52  
53  
54  
55  
56  
57  
58  
59  
60

| <i>Which of the following do you think can reduce the spread of antibiotic resistance? For each option, please answer yes, no or not sure</i> |                                                            |                                                                                                  |
|-----------------------------------------------------------------------------------------------------------------------------------------------|------------------------------------------------------------|--------------------------------------------------------------------------------------------------|
| 2.8                                                                                                                                           | Using fewer antibiotics                                    | <input type="checkbox"/> Yes<br><input type="checkbox"/> No<br><input type="checkbox"/> Not sure |
| 2.9                                                                                                                                           | Vaccination                                                | <input type="checkbox"/> Yes<br><input type="checkbox"/> No<br><input type="checkbox"/> Not sure |
| 2.10                                                                                                                                          | Handwashing                                                | <input type="checkbox"/> Yes<br><input type="checkbox"/> No<br><input type="checkbox"/> Not sure |
| 2.11                                                                                                                                          | Better hygiene and infection control measures in hospitals | <input type="checkbox"/> Yes<br><input type="checkbox"/> No<br><input type="checkbox"/> Not sure |

### *Section 3 - Experiences in using health care services*

| <i>I will now ask you some questions about the last time you had symptoms of cold and flu, like sore throat, coughing, runny nose and fever.</i> |                                                                                                                                                                               |                                                                                                                                                                                                                                                         |
|--------------------------------------------------------------------------------------------------------------------------------------------------|-------------------------------------------------------------------------------------------------------------------------------------------------------------------------------|---------------------------------------------------------------------------------------------------------------------------------------------------------------------------------------------------------------------------------------------------------|
| 3.1                                                                                                                                              | When was the last time you had symptoms of cold and flu?                                                                                                                      | _____ months ago                                                                                                                                                                                                                                        |
| 3.2                                                                                                                                              | How long did your symptoms last?                                                                                                                                              | <input type="checkbox"/> 1-3 days<br><input type="checkbox"/> 4-6 days<br><input type="checkbox"/> ≥ 1 week<br><input type="checkbox"/> Not sure                                                                                                        |
| 3.3                                                                                                                                              | On a scale of 1 to 10, where 1 is not at all severe and 10 is extremely severe, how severe were your symptoms at that time?                                                   | ___ (fill a number from 1 to 10)                                                                                                                                                                                                                        |
| 3.4                                                                                                                                              | Did you see a doctor for these symptoms?                                                                                                                                      | <input type="checkbox"/> Yes (go to 3.6)<br><input type="checkbox"/> No (go to 3.5)                                                                                                                                                                     |
| 3.5                                                                                                                                              | If no, what did you do to relieve the symptoms?                                                                                                                               | <input type="checkbox"/> Took extra rest<br><input type="checkbox"/> Took left-over antibiotics<br><input type="checkbox"/> Other: ___<br><input type="checkbox"/> Took traditional medicine<br><input type="checkbox"/> Took over-the-counter medicine |
| 3.6                                                                                                                                              | If yes, did you feel your doctor took the time to explain your illness to you?                                                                                                | <input type="checkbox"/> Yes<br><input type="checkbox"/> No                                                                                                                                                                                             |
| 3.7                                                                                                                                              | On a scale of 1 to 10, where 1 is not at all satisfied and 10 is extremely satisfied, how satisfied were you with how your doctor answered your questions about your illness? | ___ (fill a number from 1 to 10)                                                                                                                                                                                                                        |

|      |                                                                         |                                                                                                                                                                                                                                                                                                                                                                                                                 |
|------|-------------------------------------------------------------------------|-----------------------------------------------------------------------------------------------------------------------------------------------------------------------------------------------------------------------------------------------------------------------------------------------------------------------------------------------------------------------------------------------------------------|
| 3.8  | When you went to see the doctor, what did you expect?                   | <input type="checkbox"/> Advice for self-care<br><input type="checkbox"/> Information about the illnesses such as duration<br><input type="checkbox"/> Rule out more serious illnesses<br><input type="checkbox"/> For referral to hospital or specialists<br><input type="checkbox"/> Medical leave for work<br><input type="checkbox"/> Antibiotics<br><input type="checkbox"/> Other (please specify: _____) |
| 3.9  | Did you ask your doctor for antibiotics?                                | <input type="checkbox"/> Yes<br><input type="checkbox"/> No                                                                                                                                                                                                                                                                                                                                                     |
| 3.10 | Did your doctor prescribe you antibiotics?                              | <input type="checkbox"/> Yes (go to 3.11)<br><input type="checkbox"/> No (go to 3.14)<br><input type="checkbox"/> Not sure (go to Section 4)                                                                                                                                                                                                                                                                    |
| 3.11 | Did your doctor explain to you why you needed antibiotics?              | <input type="checkbox"/> Yes<br><input type="checkbox"/> No                                                                                                                                                                                                                                                                                                                                                     |
| 3.12 | Did your doctor talk to you about antibiotic resistance?                | <input type="checkbox"/> Yes<br><input type="checkbox"/> No                                                                                                                                                                                                                                                                                                                                                     |
| 3.13 | Did your doctor talk to you about possible side-effects of antibiotics? | <input type="checkbox"/> Yes<br><input type="checkbox"/> No                                                                                                                                                                                                                                                                                                                                                     |
| 3.14 | Did your doctor explain to you why you did not need antibiotics?        | <input type="checkbox"/> Yes<br><input type="checkbox"/> No                                                                                                                                                                                                                                                                                                                                                     |

#### Section 4 - Vaccination behaviors for different age groups

|                                                                                                                                                |                                                                                                               |                                                                                                                                                                                                                                                                                 |
|------------------------------------------------------------------------------------------------------------------------------------------------|---------------------------------------------------------------------------------------------------------------|---------------------------------------------------------------------------------------------------------------------------------------------------------------------------------------------------------------------------------------------------------------------------------|
| For all participants ( <i>all ages</i> ): I will now ask you some questions about your use of different vaccines to protect against infections |                                                                                                               |                                                                                                                                                                                                                                                                                 |
| 4.1                                                                                                                                            | Have you ever received an influenza vaccine?<br><i>(prompt: Also known as flu shot, flu vaccine, flu jab)</i> | <input type="checkbox"/> Yes<br><input type="checkbox"/> No<br><input type="checkbox"/> Not sure                                                                                                                                                                                |
| 4.2                                                                                                                                            | Have you received an influenza vaccine in the past year?                                                      | <input type="checkbox"/> Yes (go to 4.3)<br><input type="checkbox"/> No (go to next section)<br><input type="checkbox"/> Not sure                                                                                                                                               |
| 4.3                                                                                                                                            | When was the last time you received it?                                                                       | <input type="checkbox"/> In the past month<br><input type="checkbox"/> 1-3 months ago<br><input type="checkbox"/> 4-6 months ago<br><input type="checkbox"/> 6-12 months ago                                                                                                    |
| 4.4                                                                                                                                            | What was the reason that you received the influenza vaccine?                                                  | <input type="checkbox"/> Recommended by my doctor because I am/was traveling<br><input type="checkbox"/> Recommended by my doctor because I am/was pregnant<br><input type="checkbox"/> My job requires it<br><input type="checkbox"/> It was offered at no cost by my employer |

|  |  |                                                                                                                                    |
|--|--|------------------------------------------------------------------------------------------------------------------------------------|
|  |  | <input type="checkbox"/> I usually get annual flu vaccinations <sup>3</sup> <input type="checkbox"/> Other (please specify: _____) |
|--|--|------------------------------------------------------------------------------------------------------------------------------------|

| <i>For participants aged 65 and above</i> |                                                                                                                                                                                                                                                                                     |                                                                                                                                   |
|-------------------------------------------|-------------------------------------------------------------------------------------------------------------------------------------------------------------------------------------------------------------------------------------------------------------------------------------|-----------------------------------------------------------------------------------------------------------------------------------|
| 5.1                                       | Have you ever received the pneumococcal vaccine?<br><i>(Prompt: This is a vaccination against pneumonia)</i>                                                                                                                                                                        | <input type="checkbox"/> Yes (go to 5.2)<br><input type="checkbox"/> No (go to 5.4)<br><input type="checkbox"/> Not sure          |
| 5.2                                       | How many doses of the vaccine did you receive?<br><i>(Prompt: Pneumococcal vaccines in the NAIs include 13-valent pneumococcal conjugate vaccine (PCV13) and 23-valent pneumococcal polysaccharide vaccine (PPSV23)—one dose each is recommended for persons aged 65 and above)</i> | <input type="checkbox"/> 1<br><input type="checkbox"/> 2<br><input type="checkbox"/> Not sure                                     |
| 5.3                                       | When did you receive the last dose ?                                                                                                                                                                                                                                                | _____<br><input type="checkbox"/> Not sure                                                                                        |
| 5.4                                       | Have you ever received the varicella vaccine?<br><i>(Prompt: The varicella vaccine protects against chickenpox and shingles)</i>                                                                                                                                                    | <input type="checkbox"/> Yes (go to 5.5)<br><input type="checkbox"/> No (go to next section)<br><input type="checkbox"/> Not sure |
| 5.5                                       | How many doses of the vaccine did you receive?                                                                                                                                                                                                                                      | <input type="checkbox"/> 1<br><input type="checkbox"/> 2<br><input type="checkbox"/> Not sure                                     |
| 5.6                                       | When did you receive the last dose?                                                                                                                                                                                                                                                 | _____<br><input type="checkbox"/> Not sure                                                                                        |

| <i>For female participants (18-26 years old) and parents with daughters from the ages of 9-18 years old</i> |                                                                                                                                                                                                                                                                                                     |                                                                                                                                   |
|-------------------------------------------------------------------------------------------------------------|-----------------------------------------------------------------------------------------------------------------------------------------------------------------------------------------------------------------------------------------------------------------------------------------------------|-----------------------------------------------------------------------------------------------------------------------------------|
| 6.1                                                                                                         | Have you/has your daughter ever received the HPV vaccine?<br><i>(Prompt: HPV stands for Human Papillomavirus; two vaccines, <u>Gardasil</u> and <u>Cervavix</u>, are currently approved for use in Singapore; the HPV vaccine protects against cervical cancer and is claimable under Medisave)</i> | <input type="checkbox"/> Yes (go to 6.2)<br><input type="checkbox"/> No (go to next section)<br><input type="checkbox"/> Not sure |
| 6.2                                                                                                         | How old were you/was your daughter when you/she received the HPV vaccine?                                                                                                                                                                                                                           | Age: _____                                                                                                                        |

|     |                                                                                                                                                                               |                                                                                                                             |
|-----|-------------------------------------------------------------------------------------------------------------------------------------------------------------------------------|-----------------------------------------------------------------------------------------------------------------------------|
|     |                                                                                                                                                                               | <input type="checkbox"/> Not sure                                                                                           |
| 6.3 | How many doses of the vaccine did you/your daughter receive?<br><i>(Prompt: This is recommended for females 9-26 years, this vaccine can be given in either 2 or 3 doses)</i> | <input type="checkbox"/> 1<br><input type="checkbox"/> 2<br><input type="checkbox"/> 3<br><input type="checkbox"/> Not sure |
| 6.4 | When did you/your daughter receive the last dose of the HPV vaccine?                                                                                                          | _____<br><input type="checkbox"/> Not sure                                                                                  |

|                                                                                                                                         |                                                                                                                                                                                                                      |                                                                                                                             |
|-----------------------------------------------------------------------------------------------------------------------------------------|----------------------------------------------------------------------------------------------------------------------------------------------------------------------------------------------------------------------|-----------------------------------------------------------------------------------------------------------------------------|
| <i>For parents with <u>young children under the age of 5</u></i>                                                                        |                                                                                                                                                                                                                      |                                                                                                                             |
| 7.1                                                                                                                                     | Do you have any children under the age of 5?<br><i>(Prompt: Your child has not had his/her 5<sup>th</sup> birthday yet)</i>                                                                                          | <input type="checkbox"/> Yes<br><input type="checkbox"/> No                                                                 |
| 7.2                                                                                                                                     | How many children do you have under the age of 5?                                                                                                                                                                    | _____                                                                                                                       |
| <i>If you have more than one child under the age of 5, please first answer questions about the child <u>whose birthday is next</u>:</i> |                                                                                                                                                                                                                      |                                                                                                                             |
| 7.3                                                                                                                                     | What is your child's birth month and year?                                                                                                                                                                           | Month: ____<br>Year: ____                                                                                                   |
| 7.4                                                                                                                                     | Has your child received an influenza vaccination in the past year?<br><i>(Prompt: This is also known as flu vaccine, flu shot, flu jab)</i>                                                                          | <input type="checkbox"/> Yes<br><input type="checkbox"/> No<br><input type="checkbox"/> Not sure                            |
| 7.5                                                                                                                                     | Has your child ever received the pneumococcal vaccine?<br><i>(Prompt: Also known as PCV13 or Prevnar. This vaccine is given in 3 doses usually at 3, 5 and 12 months of age. PCV13 is claimable under Medisave)</i>  | <input type="checkbox"/> Yes (go to 7.6)<br><input type="checkbox"/> No (go to 7.9)<br><input type="checkbox"/> Not sure    |
| 7.6                                                                                                                                     | How many doses of the pneumococcal vaccine did your child receive?                                                                                                                                                   | <input type="checkbox"/> 1<br><input type="checkbox"/> 2<br><input type="checkbox"/> 3<br><input type="checkbox"/> Not sure |
| 7.7                                                                                                                                     | When did your child receive the last dose of pneumococcal vaccine?                                                                                                                                                   | _____<br><input type="checkbox"/> Not sure                                                                                  |
| 7.8                                                                                                                                     | Has your child ever received the rotavirus vaccine?<br><i>(prompt: This vaccine protects against childhood diarrhoea and is given as drops in the mouth. Usually 2 or 3 doses are given before 8 months of age".</i> | <input type="checkbox"/> Yes<br><input type="checkbox"/> No<br><input type="checkbox"/> Not sure                            |



|      |                                                                                                                                                                                                   |                                                                                                                                                   |
|------|---------------------------------------------------------------------------------------------------------------------------------------------------------------------------------------------------|---------------------------------------------------------------------------------------------------------------------------------------------------|
|      | <i>there are two types licenced in Singapore, Rotarix (RV5, 2 doses) and RotaTeq (RV1, 3 doses) usually given before 8 months of age. This vaccine is not currently claimable under Medisave)</i> |                                                                                                                                                   |
| 7.9  | How old was your child when he/she received the rotavirus vaccine?                                                                                                                                | Age: ____ months<br><input type="checkbox"/> Not sure                                                                                             |
| 7.10 | Which type of rotavirus vaccination did your child receive?                                                                                                                                       | <input type="checkbox"/> RotaTeq™ (given in 3 doses)<br><input type="checkbox"/> Rotarix™ (given in 2 doses)<br><input type="checkbox"/> Not sure |
| 7.11 | How many doses of the vaccine did your child receive?                                                                                                                                             | <input type="checkbox"/> 1<br><input type="checkbox"/> 2<br><input type="checkbox"/> 3<br><input type="checkbox"/> Not sure                       |

## APPENDIX B

|                                                      |                                                                                                                   |                    |
|------------------------------------------------------|-------------------------------------------------------------------------------------------------------------------|--------------------|
| <b>Knowledge score</b><br>Range: 0 – 14<br>Median: 8 |                                                                                                                   |                    |
| <b>Knowledge of antibiotic resistance</b>            | Have you ever heard of the abbreviation 'AMR'?                                                                    | Yes = 1 point      |
|                                                      | Have you ever heard of the term 'antibiotic resistance'?                                                          |                    |
|                                                      | Antibiotic resistance occurs when antibiotics become less powerful so they don't work as well                     | Disagree = 1 point |
|                                                      | Antibiotic resistance occurs when your body becomes resistant to the antibiotics and they no longer work as well  |                    |
|                                                      | Antibiotic resistance only affects people with serious infections in hospitals                                    |                    |
|                                                      | If I use antibiotics appropriately I don't have to worry about getting antibiotic resistant infections            |                    |
|                                                      | How other people use antibiotics doesn't affect my chance of getting antibiotic resistant infections              |                    |
|                                                      | How I use antibiotics doesn't affect other people's chances of getting antibiotic resistant infections            | Agree = 1 point    |
|                                                      | Antibiotic resistance occurs when bacteria become resistant to the antibiotics so they are more difficult to kill |                    |
|                                                      | Antibiotic resistance affects common infections such as sore throats and urinary tract infections                 |                    |
|                                                      | Using fewer antibiotics will reduce the spread of antibiotic resistance                                           |                    |
|                                                      | Vaccinations will reduce the spread of antibiotic resistance                                                      |                    |
|                                                      | Handwashing will reduce the spread of antibiotic resistance                                                       |                    |
|                                                      | Better hygiene and infection control measures in hospitals will reduce the spread of antibiotic resistance        |                    |

## APPENDIX B

|                                                                             |                                                                                                       |                    |
|-----------------------------------------------------------------------------|-------------------------------------------------------------------------------------------------------|--------------------|
| <b>Attitudes score</b><br>Range: 0 – 11<br>Median: 7                        |                                                                                                       |                    |
| <b>Attitudes towards antibiotic use (6 points)</b>                          | Antibiotics can help me recover from bacterial infections                                             | Agree = 1 point    |
|                                                                             | It is important to always finish the course of antibiotics prescribed to me                           |                    |
|                                                                             | Antibiotics can help me recover from viral infections                                                 | Disagree = 1 point |
|                                                                             | Antibiotics can help me recover from the common cold and flu                                          |                    |
|                                                                             | Antibiotics can help me recover from serious symptoms of cold and flu                                 |                    |
|                                                                             | Antibiotics can speed up my recovery from the common cold and flu                                     |                    |
|                                                                             | It is okay to keep leftover antibiotics and use them again when I fall sick in the future             |                    |
|                                                                             | It is okay to use my leftover antibiotics when I have the same symptoms as before                     |                    |
|                                                                             | It is okay not to finish the course of antibiotics prescribed to me when I feel better                |                    |
|                                                                             | It is okay not to finish the course of antibiotics prescribed to me when I have an alternative remedy |                    |
| It is okay to miss a dose during the course of antibiotics prescribed to me |                                                                                                       |                    |

**Appendix C**

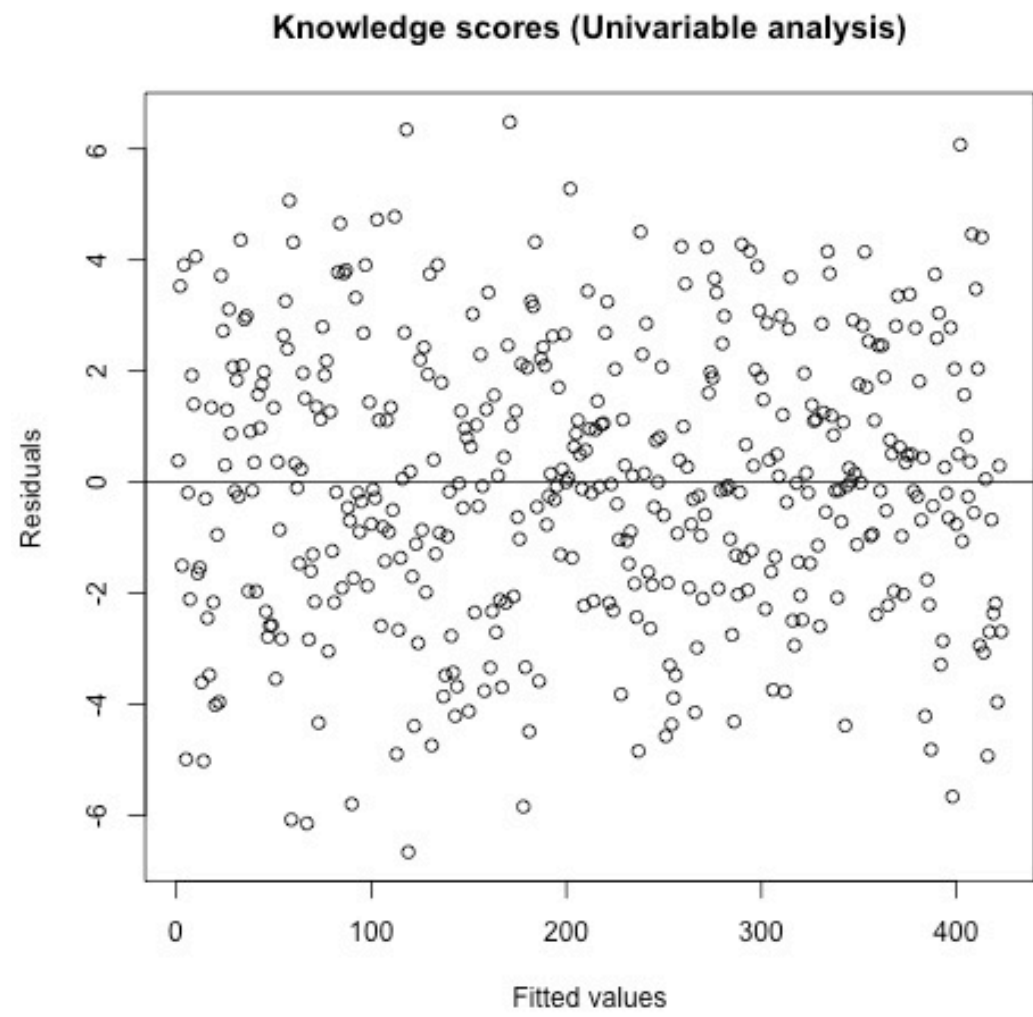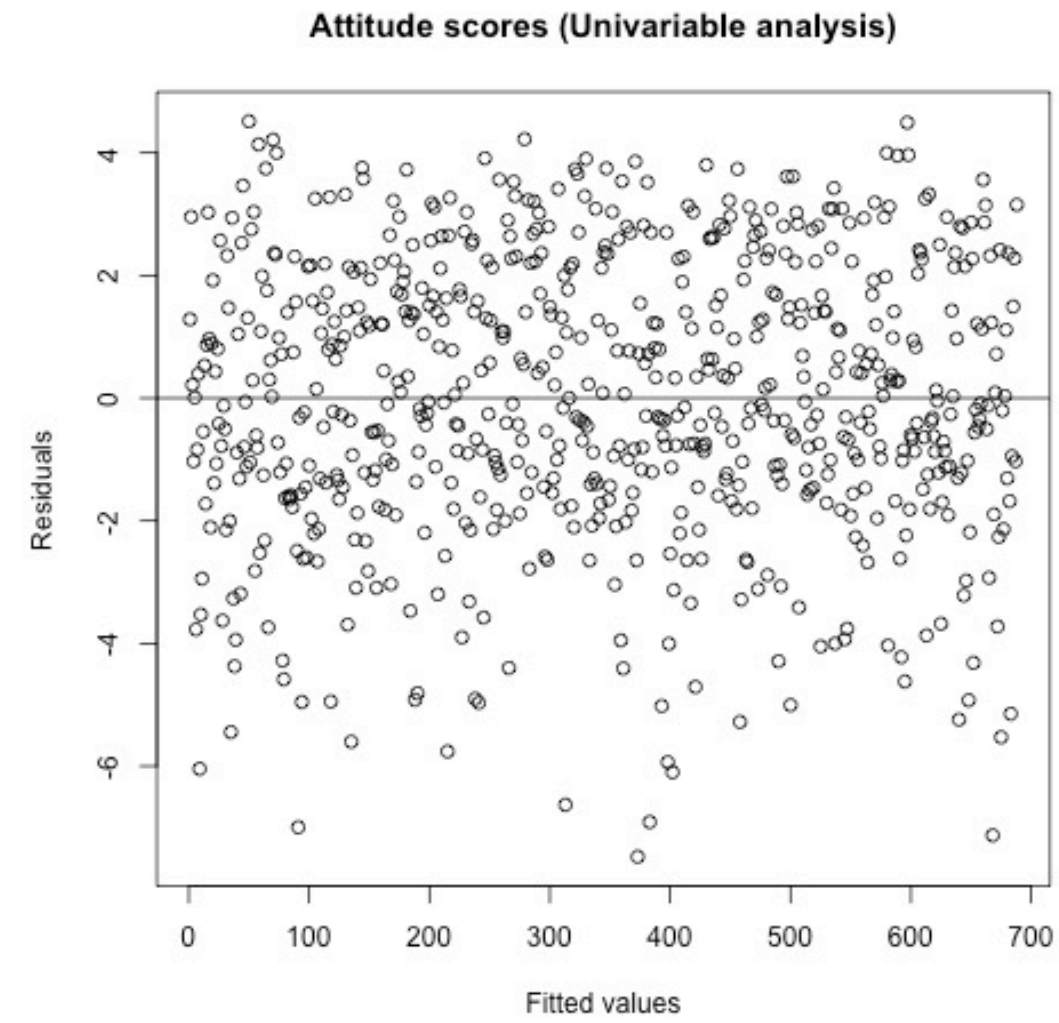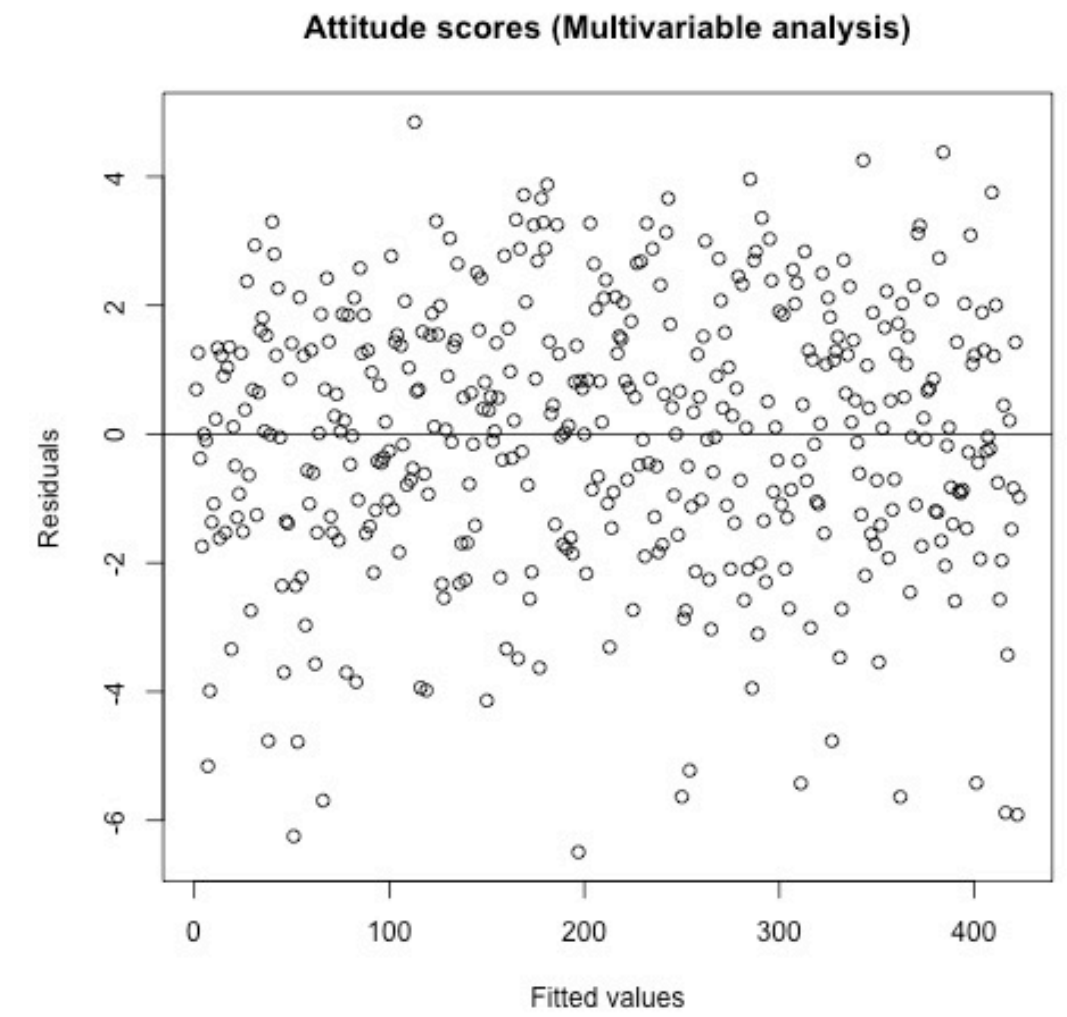

1  
2  
3  
4  
5  
6  
7  
8  
9  
10  
11  
12  
13  
14  
15  
16  
17  
18  
19  
20  
21  
22  
23  
24  
25  
26  
27  
28  
29  
30  
31  
32  
33  
34  
35  
36  
37  
38  
39  
40  
41  
42  
43  
44  
45  
46  
47  
48  
49  
50  
51  
52  
53  
54  
55  
56  
57  
58  
59  
60

STROBE Statement—Checklist of items that should be included in reports of *cross-sectional studies*

|                              | Item No | Recommendation                                                                                                                                                                                               | Page No |
|------------------------------|---------|--------------------------------------------------------------------------------------------------------------------------------------------------------------------------------------------------------------|---------|
| <b>Title and abstract</b>    | 1       | (a) Indicate the study's design with a commonly used term in the title or the abstract                                                                                                                       | 1       |
|                              |         | (b) Provide in the abstract an informative and balanced summary of what was done and what was found                                                                                                          | 2       |
| <b>Introduction</b>          |         |                                                                                                                                                                                                              |         |
| Background/rationale         | 2       | Explain the scientific background and rationale for the investigation being reported                                                                                                                         | 4       |
| Objectives                   | 3       | State specific objectives, including any prespecified hypotheses                                                                                                                                             | 4       |
| <b>Methods</b>               |         |                                                                                                                                                                                                              |         |
| Study design                 | 4       | Present key elements of study design early in the paper                                                                                                                                                      | 4       |
| Setting                      | 5       | Describe the setting, locations, and relevant dates, including periods of recruitment, exposure, follow-up, and data collection                                                                              | 4       |
| Participants                 | 6       | (a) Give the eligibility criteria, and the sources and methods of selection of participants                                                                                                                  | 4       |
| Variables                    | 7       | Clearly define all outcomes, exposures, predictors, potential confounders, and effect modifiers. Give diagnostic criteria, if applicable                                                                     | 4-5     |
| Data sources/<br>measurement | 8*      | For each variable of interest, give sources of data and details of methods of assessment (measurement). Describe comparability of assessment methods if there is more than one group                         | 4-5     |
| Bias                         | 9       | Describe any efforts to address potential sources of bias                                                                                                                                                    | 5       |
| Study size                   | 10      | Explain how the study size was arrived at                                                                                                                                                                    | 4       |
| Quantitative variables       | 11      | Explain how quantitative variables were handled in the analyses. If applicable, describe which groupings were chosen and why                                                                                 | 5       |
| Statistical methods          | 12      | (a) Describe all statistical methods, including those used to control for confounding                                                                                                                        | 5       |
|                              |         | (b) Describe any methods used to examine subgroups and interactions                                                                                                                                          | 5       |
|                              |         | (c) Explain how missing data were addressed                                                                                                                                                                  | Na      |
|                              |         | (d) If applicable, describe analytical methods taking account of sampling strategy                                                                                                                           | Na      |
|                              |         | (e) Describe any sensitivity analyses                                                                                                                                                                        | 5       |
| <b>Results</b>               |         |                                                                                                                                                                                                              |         |
| Participants                 | 13*     | (a) Report numbers of individuals at each stage of study—eg numbers potentially eligible, examined for eligibility, confirmed eligible, included in the study, completing follow-up, and analysed            | 5-6     |
|                              |         | (b) Give reasons for non-participation at each stage                                                                                                                                                         | Na      |
|                              |         | (c) Consider use of a flow diagram                                                                                                                                                                           | Na      |
| Descriptive data             | 14*     | (a) Give characteristics of study participants (eg demographic, clinical, social) and information on exposures and potential confounders                                                                     | 6       |
|                              |         | (b) Indicate number of participants with missing data for each variable of interest                                                                                                                          | 6-7     |
| Outcome data                 | 15*     | Report numbers of outcome events or summary measures                                                                                                                                                         | 6-7     |
| Main results                 | 16      | (a) Give unadjusted estimates and, if applicable, confounder-adjusted estimates and their precision (eg, 95% confidence interval). Make clear which confounders were adjusted for and why they were included | 7       |

|                          |    |                                                                                                                                                                            |     |
|--------------------------|----|----------------------------------------------------------------------------------------------------------------------------------------------------------------------------|-----|
|                          |    | (b) Report category boundaries when continuous variables were categorized                                                                                                  | 7   |
|                          |    | (c) If relevant, consider translating estimates of relative risk into absolute risk for a meaningful time period                                                           | Na  |
| Other analyses           | 17 | Report other analyses done—eg analyses of subgroups and interactions, and sensitivity analyses                                                                             | 7-8 |
| <b>Discussion</b>        |    |                                                                                                                                                                            |     |
| Key results              | 18 | Summarise key results with reference to study objectives                                                                                                                   | 7   |
| Limitations              | 19 | Discuss limitations of the study, taking into account sources of potential bias or imprecision. Discuss both direction and magnitude of any potential bias                 | 8   |
| Interpretation           | 20 | Give a cautious overall interpretation of results considering objectives, limitations, multiplicity of analyses, results from similar studies, and other relevant evidence | 8   |
| Generalisability         | 21 | Discuss the generalisability (external validity) of the study results                                                                                                      | 8   |
| <b>Other information</b> |    |                                                                                                                                                                            |     |
| Funding                  | 22 | Give the source of funding and the role of the funders for the present study and, if applicable, for the original study on which the present article is based              | 9   |

\*Give information separately for exposed and unexposed groups.

**Note:** An Explanation and Elaboration article discusses each checklist item and gives methodological background and published examples of transparent reporting. The STROBE checklist is best used in conjunction with this article (freely available on the Web sites of PLoS Medicine at <http://www.plosmedicine.org/>, Annals of Internal Medicine at <http://www.annals.org/>, and Epidemiology at <http://www.epidem.com/>). Information on the STROBE Initiative is available at [www.strobe-statement.org](http://www.strobe-statement.org).
