# Supplementary material for: Public knowledge, attitudes and practices related to antibiotic use and resistance in Singapore: a cross-sectional population survey
Source: PubMed Central journal article supplement — BMJ Open. 2021 Sep 13;11(9):e048157. doi: 10.1136/bmjopen-2020-048157 (PMC8438872; doi:10.1136/bmjopen-2020-048157), 2021-09-13
Supplement: bmjopen-2020-048157supp001.pdf [file bmjopen-2020-048157supp001.pdf]

**Survey title: A survey of knowledge, attitudes and practices surrounding antibiotics and vaccines in Singapore**

**Section 1 - Knowledge and attitudes regarding antibiotics**

|                                                                                                                                                                   |                                                                                                                                                                                                                 |                                                                                                          |
|-------------------------------------------------------------------------------------------------------------------------------------------------------------------|-----------------------------------------------------------------------------------------------------------------------------------------------------------------------------------------------------------------|----------------------------------------------------------------------------------------------------------|
| <i>First, I'd like to ask you some questions about antibiotic medications</i>                                                                                     |                                                                                                                                                                                                                 |                                                                                                          |
| 1.1                                                                                                                                                               | Have you ever heard of a type of medication called 'antibiotics'?                                                                                                                                               | <input type="checkbox"/> Yes (go to 1.2)<br><input type="checkbox"/> No (go to Section 2)                |
|                                                                                                                                                                   | <i>If necessary, prompt: "Antibiotics are a type of medication used to treat certain types of infections. Some examples of antibiotics are Augmentin, Zithromax, amoxycillin, clarithromycin, streptomycin"</i> |                                                                                                          |
| <i>Now I will tell you a few statements regarding antibiotics. For each statement, please let me know if you <b>agree</b>, <b>disagree</b> or <b>not sure</b></i> |                                                                                                                                                                                                                 |                                                                                                          |
| 1.2                                                                                                                                                               | Antibiotics can help you recover from bacterial infections                                                                                                                                                      | <input type="checkbox"/> Agree<br><input type="checkbox"/> Disagree<br><input type="checkbox"/> Not sure |
| 1.3                                                                                                                                                               | Antibiotics can help you recover from viral infections                                                                                                                                                          | <input type="checkbox"/> Agree<br><input type="checkbox"/> Disagree<br><input type="checkbox"/> Not sure |
| 1.4                                                                                                                                                               | Antibiotics can help you recover from the common cold and flu                                                                                                                                                   | <input type="checkbox"/> Agree<br><input type="checkbox"/> Disagree<br><input type="checkbox"/> Not sure |
| 1.5                                                                                                                                                               | Antibiotics can help you recover from serious symptoms of cold and flu                                                                                                                                          | <input type="checkbox"/> Agree<br><input type="checkbox"/> Disagree<br><input type="checkbox"/> Not sure |
| 1.6                                                                                                                                                               | Antibiotics can speed up your recovery from the common cold and flu                                                                                                                                             | <input type="checkbox"/> Agree<br><input type="checkbox"/> Disagree<br><input type="checkbox"/> Not sure |
| 1.7                                                                                                                                                               | It is okay to share my antibiotics with family and friends when they are sick with the same symptoms                                                                                                            | <input type="checkbox"/> Agree<br><input type="checkbox"/> Disagree<br><input type="checkbox"/> Not sure |
| 1.8                                                                                                                                                               | It is okay to share my antibiotics with family and friends when they are sick with different symptoms                                                                                                           | <input type="checkbox"/> Agree<br><input type="checkbox"/> Disagree<br><input type="checkbox"/> Not sure |
| 1.9                                                                                                                                                               | It is okay to share my antibiotics with my pets when they are sick                                                                                                                                              | <input type="checkbox"/> Agree<br><input type="checkbox"/> Disagree<br><input type="checkbox"/> Not sure |
| 1.10                                                                                                                                                              | It is okay to keep leftover antibiotics and use them again when I fall sick in the future                                                                                                                       | <input type="checkbox"/> Agree<br><input type="checkbox"/> Disagree<br><input type="checkbox"/> Not sure |

|      |                                                                                                       |                                                                                                          |
|------|-------------------------------------------------------------------------------------------------------|----------------------------------------------------------------------------------------------------------|
| 1.11 | It is okay for me to use my leftover antibiotics when I have the same symptoms as before              | <input type="checkbox"/> Agree<br><input type="checkbox"/> Disagree<br><input type="checkbox"/> Not sure |
| 1.12 | It is important to always finish the course of antibiotics prescribed to me                           | <input type="checkbox"/> Agree<br><input type="checkbox"/> Disagree<br><input type="checkbox"/> Not sure |
| 1.13 | It is okay not to finish the course of antibiotics prescribed to me when I feel better                | <input type="checkbox"/> Agree<br><input type="checkbox"/> Disagree<br><input type="checkbox"/> Not sure |
| 1.14 | It is okay not to finish the course of antibiotics prescribed to me when I have an alternative remedy | <input type="checkbox"/> Agree<br><input type="checkbox"/> Disagree<br><input type="checkbox"/> Not sure |
| 1.15 | It is okay to miss a dose during the course of antibiotics prescribed to me                           | <input type="checkbox"/> Agree<br><input type="checkbox"/> Disagree<br><input type="checkbox"/> Not sure |

## Section 2 - Knowledge and attitude regarding antibiotic resistance

|                                                                                                                                    |                                                                                                                   |                                                                                                          |
|------------------------------------------------------------------------------------------------------------------------------------|-------------------------------------------------------------------------------------------------------------------|----------------------------------------------------------------------------------------------------------|
| <i>Thanks a lot. We will now move on to questions about antibiotic resistance.</i>                                                 |                                                                                                                   |                                                                                                          |
| 2.1                                                                                                                                | Have you ever heard of the term 'antibiotic resistance'?                                                          | <input type="checkbox"/> Yes (go to 2.2)<br><input type="checkbox"/> No (go to Section 3)                |
| <i>I will now state a few statements regarding antibiotic resistance. Please tell me if you <b>agree, disagree or not sure</b></i> |                                                                                                                   |                                                                                                          |
| 2.2                                                                                                                                | Antibiotic resistance occurs when antibiotics become less powerful so they don't work as well                     | <input type="checkbox"/> Agree<br><input type="checkbox"/> Disagree<br><input type="checkbox"/> Not sure |
| 2.3                                                                                                                                | Antibiotic resistance occurs when your body becomes resistant to the antibiotics and they no longer work as well  | <input type="checkbox"/> Agree<br><input type="checkbox"/> Disagree<br><input type="checkbox"/> Not sure |
| 2.4                                                                                                                                | Antibiotic resistance occurs when bacteria become resistant to the antibiotics so they are more difficult to kill | <input type="checkbox"/> Agree<br><input type="checkbox"/> Disagree<br><input type="checkbox"/> Not sure |
| 2.5                                                                                                                                | If I use antibiotics appropriately, I don't have to worry about getting antibiotic resistant infections           | <input type="checkbox"/> Agree<br><input type="checkbox"/> Disagree<br><input type="checkbox"/> Not sure |
| 2.6                                                                                                                                | How other people use antibiotics doesn't affect my chance of getting antibiotic resistant infections.             | <input type="checkbox"/> Agree<br><input type="checkbox"/> Disagree<br><input type="checkbox"/> Not sure |
| 2.7                                                                                                                                | How I use antibiotic doesn't affect other people's chance of getting antibiotic resistant infections              | <input type="checkbox"/> Agree<br><input type="checkbox"/> Disagree<br><input type="checkbox"/> Not sure |

| <i>Which of the following do you think can reduce the spread of antibiotic resistance? For each option, please answer yes, no or not sure</i> |                                                            |                                                                                                  |
|-----------------------------------------------------------------------------------------------------------------------------------------------|------------------------------------------------------------|--------------------------------------------------------------------------------------------------|
| 2.8                                                                                                                                           | Using fewer antibiotics                                    | <input type="checkbox"/> Yes<br><input type="checkbox"/> No<br><input type="checkbox"/> Not sure |
| 2.9                                                                                                                                           | Vaccination                                                | <input type="checkbox"/> Yes<br><input type="checkbox"/> No<br><input type="checkbox"/> Not sure |
| 2.10                                                                                                                                          | Handwashing                                                | <input type="checkbox"/> Yes<br><input type="checkbox"/> No<br><input type="checkbox"/> Not sure |
| 2.11                                                                                                                                          | Better hygiene and infection control measures in hospitals | <input type="checkbox"/> Yes<br><input type="checkbox"/> No<br><input type="checkbox"/> Not sure |

### *Section 3 – Experiences in using health care services*

| <i>I will now ask you some questions about the last time you had symptoms of cold and flu, like sore throat, coughing, runny nose and fever.</i> |                                                                                                                                                                               |                                                                                                                                                                                                                                                          |
|--------------------------------------------------------------------------------------------------------------------------------------------------|-------------------------------------------------------------------------------------------------------------------------------------------------------------------------------|----------------------------------------------------------------------------------------------------------------------------------------------------------------------------------------------------------------------------------------------------------|
| 3.1                                                                                                                                              | When was the last time you had symptoms of cold and flu?                                                                                                                      | _____ months ago                                                                                                                                                                                                                                         |
| 3.2                                                                                                                                              | How long did your symptoms last?                                                                                                                                              | <input type="checkbox"/> 1-3 days<br><input type="checkbox"/> 4-6 days<br><input type="checkbox"/> ≥ 1 week<br><input type="checkbox"/> Not sure                                                                                                         |
| 3.3                                                                                                                                              | On a scale of 1 to 10, where 1 is not at all severe and 10 is extremely severe, how severe were your symptoms at that time?                                                   | ___ (fill a number from 1 to 10)                                                                                                                                                                                                                         |
| 3.4                                                                                                                                              | Did you see a doctor for these symptoms?                                                                                                                                      | <input type="checkbox"/> Yes (go to 3.6)<br><input type="checkbox"/> No (go to 3.5)                                                                                                                                                                      |
| 3.5                                                                                                                                              | If no, what did you do to relieve the symptoms?                                                                                                                               | <input type="checkbox"/> Took extra rest<br><input type="checkbox"/> Took left-over antibiotics<br><input type="checkbox"/> Other: ____<br><input type="checkbox"/> Took traditional medicine<br><input type="checkbox"/> Took over-the-counter medicine |
| 3.6                                                                                                                                              | If yes, did you feel your doctor took the time to explain your illness to you?                                                                                                | <input type="checkbox"/> Yes<br><input type="checkbox"/> No                                                                                                                                                                                              |
| 3.7                                                                                                                                              | On a scale of 1 to 10, where 1 is not at all satisfied and 10 is extremely satisfied, how satisfied were you with how your doctor answered your questions about your illness? | ___ (fill a number from 1 to 10)                                                                                                                                                                                                                         |

|      |                                                                         |                                                                                                                                                                                                                                                                                                                                                                                                                 |
|------|-------------------------------------------------------------------------|-----------------------------------------------------------------------------------------------------------------------------------------------------------------------------------------------------------------------------------------------------------------------------------------------------------------------------------------------------------------------------------------------------------------|
| 3.8  | When you went to see the doctor, what did you expect?                   | <input type="checkbox"/> Advice for self-care<br><input type="checkbox"/> Information about the illnesses such as duration<br><input type="checkbox"/> Rule out more serious illnesses<br><input type="checkbox"/> For referral to hospital or specialists<br><input type="checkbox"/> Medical leave for work<br><input type="checkbox"/> Antibiotics<br><input type="checkbox"/> Other (please specify: _____) |
| 3.9  | Did you ask your doctor for antibiotics?                                | <input type="checkbox"/> Yes<br><input type="checkbox"/> No                                                                                                                                                                                                                                                                                                                                                     |
| 3.10 | Did your doctor prescribe you antibiotics?                              | <input type="checkbox"/> Yes (go to 3.11)<br><input type="checkbox"/> No (go to 3.14)<br><input type="checkbox"/> Not sure (go to Section 4)                                                                                                                                                                                                                                                                    |
| 3.11 | Did your doctor explain to you why you needed antibiotics?              | <input type="checkbox"/> Yes<br><input type="checkbox"/> No                                                                                                                                                                                                                                                                                                                                                     |
| 3.12 | Did your doctor talk to you about antibiotic resistance?                | <input type="checkbox"/> Yes<br><input type="checkbox"/> No                                                                                                                                                                                                                                                                                                                                                     |
| 3.13 | Did your doctor talk to you about possible side-effects of antibiotics? | <input type="checkbox"/> Yes<br><input type="checkbox"/> No                                                                                                                                                                                                                                                                                                                                                     |
| 3.14 | Did your doctor explain to you why you did not need antibiotics?        | <input type="checkbox"/> Yes<br><input type="checkbox"/> No                                                                                                                                                                                                                                                                                                                                                     |

#### Section 4 – Vaccination behaviors for different age groups

|                                                                                                                                              |                                                                                                               |                                                                                                                                                                                                                                                                                 |
|----------------------------------------------------------------------------------------------------------------------------------------------|---------------------------------------------------------------------------------------------------------------|---------------------------------------------------------------------------------------------------------------------------------------------------------------------------------------------------------------------------------------------------------------------------------|
| <i>For all participants (all ages): I will now ask you some questions about your use of different vaccines to protect against infections</i> |                                                                                                               |                                                                                                                                                                                                                                                                                 |
| 4.1                                                                                                                                          | Have you ever received an influenza vaccine?<br><i>(prompt: Also known as flu shot, flu vaccine, flu jab)</i> | <input type="checkbox"/> Yes<br><input type="checkbox"/> No<br><input type="checkbox"/> Not sure                                                                                                                                                                                |
| 4.2                                                                                                                                          | Have you received an influenza vaccine in the past year?                                                      | <input type="checkbox"/> Yes (go to 4.3)<br><input type="checkbox"/> No (go to next section)<br><input type="checkbox"/> Not sure                                                                                                                                               |
| 4.3                                                                                                                                          | When was the last time you received it?                                                                       | <input type="checkbox"/> In the past month<br><input type="checkbox"/> 1-3 months ago<br><input type="checkbox"/> 4-6 months ago<br><input type="checkbox"/> 6-12 months ago                                                                                                    |
| 4.4                                                                                                                                          | What was the reason that you received the influenza vaccine?                                                  | <input type="checkbox"/> Recommended by my doctor because I am/was traveling<br><input type="checkbox"/> Recommended by my doctor because I am/was pregnant<br><input type="checkbox"/> My job requires it<br><input type="checkbox"/> It was offered at no cost by my employer |

|  |  |                                                                                                                          |
|--|--|--------------------------------------------------------------------------------------------------------------------------|
|  |  | <input type="checkbox"/> I usually get annual flu vaccinations<br><input type="checkbox"/> Other (please specify: _____) |
|--|--|--------------------------------------------------------------------------------------------------------------------------|

| <i>For participants <u>aged 65 and above</u></i> |                                                                                                                                                                                                                                                                                    |                                                                                                                                   |
|--------------------------------------------------|------------------------------------------------------------------------------------------------------------------------------------------------------------------------------------------------------------------------------------------------------------------------------------|-----------------------------------------------------------------------------------------------------------------------------------|
| 5.1                                              | Have you ever received the pneumococcal vaccine?<br><i>(Prompt: This is a vaccination against pneumonia)</i>                                                                                                                                                                       | <input type="checkbox"/> Yes (go to 5.2)<br><input type="checkbox"/> No (go to 5.4)<br><input type="checkbox"/> Not sure          |
| 5.2                                              | How many doses of the vaccine did you receive?<br><i>(Prompt: Pneumococcal vaccines in the NAI include 13-valent pneumococcal conjugate vaccine (PCV13) and 23-valent pneumococcal polysaccharide vaccine (PPSV23)—one dose each is recommended for persons aged 65 and above)</i> | <input type="checkbox"/> 1<br><input type="checkbox"/> 2<br><input type="checkbox"/> Not sure                                     |
| 5.3                                              | When did you receive the last dose ?                                                                                                                                                                                                                                               | _____<br><input type="checkbox"/> Not sure                                                                                        |
| 5.4                                              | Have you ever received the varicella vaccine?<br><i>(Prompt: The varicella vaccine protects against chickenpox and shingles)</i>                                                                                                                                                   | <input type="checkbox"/> Yes (go to 5.5)<br><input type="checkbox"/> No (go to next section)<br><input type="checkbox"/> Not sure |
| 5.5                                              | How many doses of the vaccine did you receive?                                                                                                                                                                                                                                     | <input type="checkbox"/> 1<br><input type="checkbox"/> 2<br><input type="checkbox"/> Not sure                                     |
| 5.6                                              | When did you receive the last dose?                                                                                                                                                                                                                                                | _____<br><input type="checkbox"/> Not sure                                                                                        |

| <i>For <u>female participants (18-26 years old)</u> and parents with <u>daughters from the ages of 9-18 years old</u></i> |                                                                                                                                                                                                                                                                                                     |                                                                                                                                   |
|---------------------------------------------------------------------------------------------------------------------------|-----------------------------------------------------------------------------------------------------------------------------------------------------------------------------------------------------------------------------------------------------------------------------------------------------|-----------------------------------------------------------------------------------------------------------------------------------|
| 6.1                                                                                                                       | Have you/has your daughter ever received the HPV vaccine?<br><i>(Prompt: HPV stands for Human Papillomavirus; two vaccines, <u>Gardasil</u> and <u>Cervavix</u>, are currently approved for use in Singapore; the HPV vaccine protects against cervical cancer and is claimable under Medisave)</i> | <input type="checkbox"/> Yes (go to 6.2)<br><input type="checkbox"/> No (go to next section)<br><input type="checkbox"/> Not sure |
| 6.2                                                                                                                       | How old were you/was your daughter when you/she received the HPV vaccine?                                                                                                                                                                                                                           | Age: _____                                                                                                                        |

|     |                                                                                                                                                                                   |                                                                                                                             |
|-----|-----------------------------------------------------------------------------------------------------------------------------------------------------------------------------------|-----------------------------------------------------------------------------------------------------------------------------|
|     |                                                                                                                                                                                   | <input type="checkbox"/> Not sure                                                                                           |
| 6.3 | How many doses of the vaccine did you/your daughter receive?<br><br><i>(Prompt: This is recommended for females 9-26 years, this vaccine can be given in either 2 or 3 doses)</i> | <input type="checkbox"/> 1<br><input type="checkbox"/> 2<br><input type="checkbox"/> 3<br><input type="checkbox"/> Not sure |
| 6.4 | When did you/your daughter receive the last dose of the HPV vaccine?                                                                                                              | _____<br><input type="checkbox"/> Not sure                                                                                  |

|                                                                                                                                         |                                                                                                                                                                                                                          |                                                                                                                             |
|-----------------------------------------------------------------------------------------------------------------------------------------|--------------------------------------------------------------------------------------------------------------------------------------------------------------------------------------------------------------------------|-----------------------------------------------------------------------------------------------------------------------------|
| <i>For parents with <u>young children under the age of 5</u></i>                                                                        |                                                                                                                                                                                                                          |                                                                                                                             |
| 7.1                                                                                                                                     | Do you have any children under the age of 5?<br><br><i>(Prompt: Your child has not had his/her 5<sup>th</sup> birthday yet)</i>                                                                                          | <input type="checkbox"/> Yes<br><input type="checkbox"/> No                                                                 |
| 7.2                                                                                                                                     | How many children do you have under the age of 5?                                                                                                                                                                        | _____                                                                                                                       |
| <i>If you have more than one child under the age of 5, please first answer questions about the child <u>whose birthday is next</u>:</i> |                                                                                                                                                                                                                          |                                                                                                                             |
| 7.3                                                                                                                                     | What is your child's birth month and year?                                                                                                                                                                               | Month: ____<br>Year: ____                                                                                                   |
| 7.4                                                                                                                                     | Has your child received an influenza vaccination in the past year?<br><br><i>(Prompt: This is also known as flu vaccine, flu shot, flu jab)</i>                                                                          | <input type="checkbox"/> Yes<br><input type="checkbox"/> No<br><input type="checkbox"/> Not sure                            |
| 7.5                                                                                                                                     | Has your child ever received the pneumococcal vaccine?<br><br><i>(Prompt: Also known as PCV13 or Prevnar. This vaccine is given in 3 doses usually at 3, 5 and 12 months of age. PCV13 is claimable under Medisave)</i>  | <input type="checkbox"/> Yes (go to 7.6)<br><input type="checkbox"/> No (go to 7.9)<br><input type="checkbox"/> Not sure    |
| 7.6                                                                                                                                     | How many doses of the pneumococcal vaccine did your child receive?                                                                                                                                                       | <input type="checkbox"/> 1<br><input type="checkbox"/> 2<br><input type="checkbox"/> 3<br><input type="checkbox"/> Not sure |
| 7.7                                                                                                                                     | When did your child receive the last dose of pneumococcal vaccine?                                                                                                                                                       | _____<br><input type="checkbox"/> Not sure                                                                                  |
| 7.8                                                                                                                                     | Has your child ever received the rotavirus vaccine?<br><br><i>(prompt: This vaccine protects against childhood diarrhoea and is given as drops in the mouth. Usually 2 or 3 doses are given before 8 months of age).</i> | <input type="checkbox"/> Yes<br><input type="checkbox"/> No<br><input type="checkbox"/> Not sure                            |

|      |                                                                                                                                                                                                   |                                                                                                                                                   |
|------|---------------------------------------------------------------------------------------------------------------------------------------------------------------------------------------------------|---------------------------------------------------------------------------------------------------------------------------------------------------|
|      | <i>there are two types licenced in Singapore, Rotarix (RV5, 2 doses) and RotaTeq (RV1, 3 doses) usually given before 8 months of age. This vaccine is not currently claimable under Medisave)</i> |                                                                                                                                                   |
| 7.9  | How old was your child when he/she received the rotavirus vaccine?                                                                                                                                | Age: ____ months<br><input type="checkbox"/> Not sure                                                                                             |
| 7.10 | Which type of rotavirus vaccination did your child receive?                                                                                                                                       | <input type="checkbox"/> RotaTeq™ (given in 3 doses)<br><input type="checkbox"/> Rotarix™ (given in 2 doses)<br><input type="checkbox"/> Not sure |
| 7.11 | How many doses of the vaccine did your child receive?                                                                                                                                             | <input type="checkbox"/> 1<br><input type="checkbox"/> 2<br><input type="checkbox"/> 3<br><input type="checkbox"/> Not sure                       |
