# Supplementary material for: Public knowledge, attitudes and practices related to antibiotic use and resistance in Singapore: a cross-sectional population survey
Source: PubMed Central journal article supplement — BMJ Open. 2021 Sep 13;11(9):e048157. doi: 10.1136/bmjopen-2020-048157 (PMC8438872; doi:10.1136/bmjopen-2020-048157), 2021-09-13
Supplement: bmjopen-2020-048157supp002.pdf [file bmjopen-2020-048157supp002.pdf]

## APPENDIX B

| <b>Knowledge score</b><br>Range: 0 – 14<br>Median: 8 |                                                                                                                   |                    |
|------------------------------------------------------|-------------------------------------------------------------------------------------------------------------------|--------------------|
| <b>Knowledge of antibiotic resistance</b>            | Have you ever heard of the abbreviation 'AMR'?                                                                    | Yes = 1 point      |
|                                                      | Have you ever heard of the term 'antibiotic resistance'?                                                          |                    |
|                                                      | Antibiotic resistance occurs when antibiotics become less powerful so they don't work as well                     | Disagree = 1 point |
|                                                      | Antibiotic resistance occurs when your body becomes resistant to the antibiotics and they no longer work as well  |                    |
|                                                      | Antibiotic resistance only affects people with serious infections in hospitals                                    |                    |
|                                                      | If I use antibiotics appropriately I don't have to worry about getting antibiotic resistant infections            |                    |
|                                                      | How other people use antibiotics doesn't affect my chance of getting antibiotic resistant infections              |                    |
|                                                      | How I use antibiotics doesn't affect other people's chances of getting antibiotic resistant infections            | Agree = 1 point    |
|                                                      | Antibiotic resistance occurs when bacteria become resistant to the antibiotics so they are more difficult to kill |                    |
|                                                      | Antibiotic resistance affects common infections such as sore throats and urinary tract infections                 |                    |
|                                                      | Using fewer antibiotics will reduce the spread of antibiotic resistance                                           |                    |
|                                                      | Vaccinations will reduce the spread of antibiotic resistance                                                      |                    |
|                                                      | Handwashing will reduce the spread of antibiotic resistance                                                       |                    |
|                                                      | Better hygiene and infection control measures in hospitals will reduce the spread of antibiotic resistance        |                    |

## APPENDIX B

| <b>Attitudes score</b><br>Range: 0 – 11<br>Median: 7 |                                                                                                       |                    |
|------------------------------------------------------|-------------------------------------------------------------------------------------------------------|--------------------|
| <b>Attitudes towards antibiotic use (6 points)</b>   | Antibiotics can help me recover from bacterial infections                                             | Agree = 1 point    |
|                                                      | It is important to always finish the course of antibiotics prescribed to me                           |                    |
|                                                      | Antibiotics can help me recover from viral infections                                                 | Disagree = 1 point |
|                                                      | Antibiotics can help me recover from the common cold and flu                                          |                    |
|                                                      | Antibiotics can help me recover from serious symptoms of cold and flu                                 |                    |
|                                                      | Antibiotics can speed up my recovery from the common cold and flu                                     |                    |
|                                                      | It is okay to keep leftover antibiotics and use them again when I fall sick in the future             |                    |
|                                                      | It is okay to use my leftover antibiotics when I have the same symptoms as before                     |                    |
|                                                      | It is okay not to finish the course of antibiotics prescribed to me when I feel better                |                    |
|                                                      | It is okay not to finish the course of antibiotics prescribed to me when I have an alternative remedy |                    |
|                                                      | It is okay to miss a dose during the course of antibiotics prescribed to me                           |                    |
