# Supplementary material for: Public knowledge, attitudes and practices related to antibiotic use and resistance in Singapore: a cross-sectional population survey
Source: PubMed Central journal article supplement — BMJ Open. 2021 Sep 13;11(9):e048157. doi: 10.1136/bmjopen-2020-048157 (PMC8438872; doi:10.1136/bmjopen-2020-048157), 2021-09-13

## Appendix C

Knowledge scores (Univariable analysis)

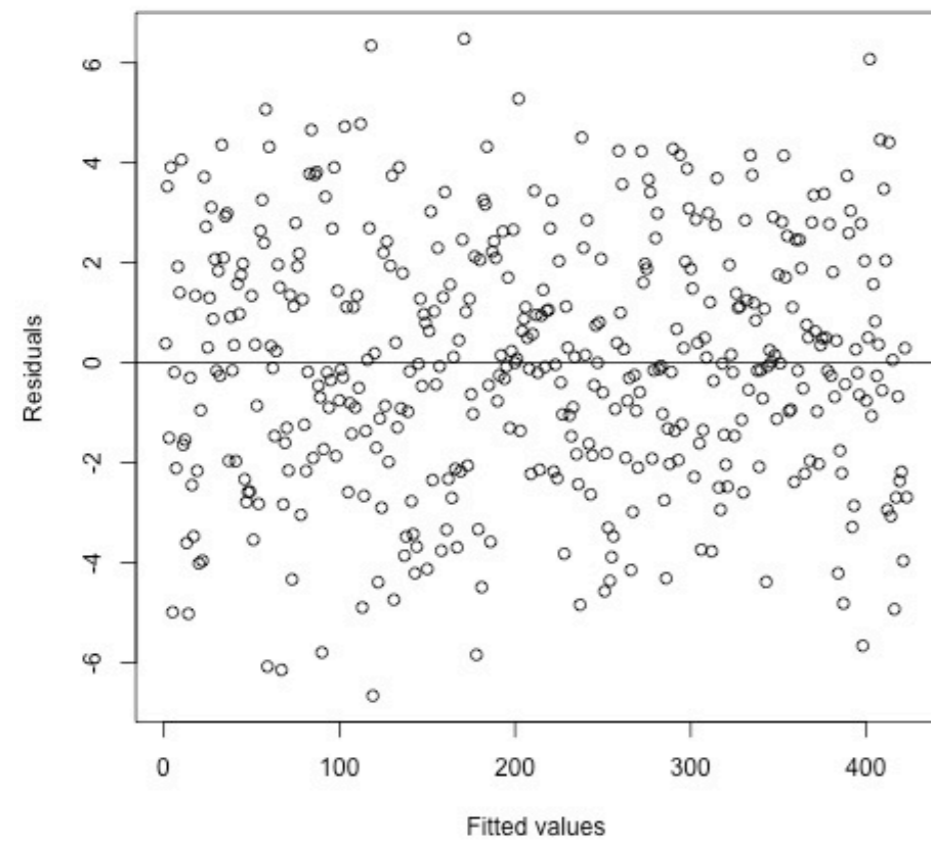

Attitude scores (Univariable analysis)

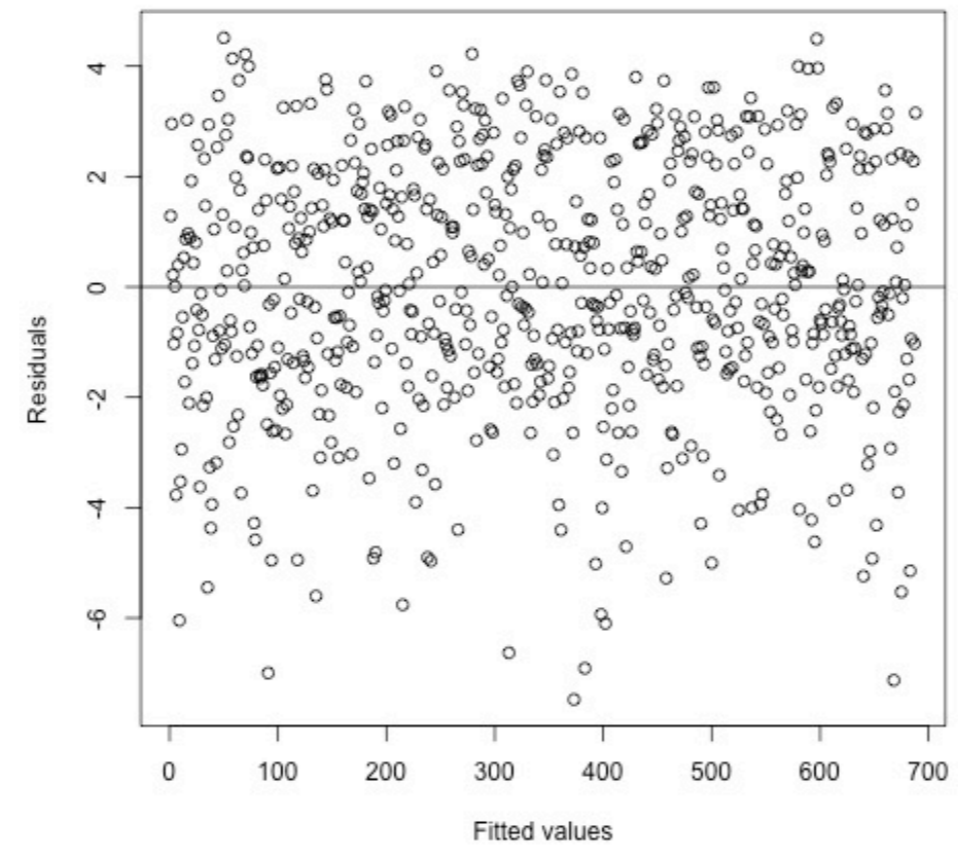

Attitude scores (Multivariable analysis)

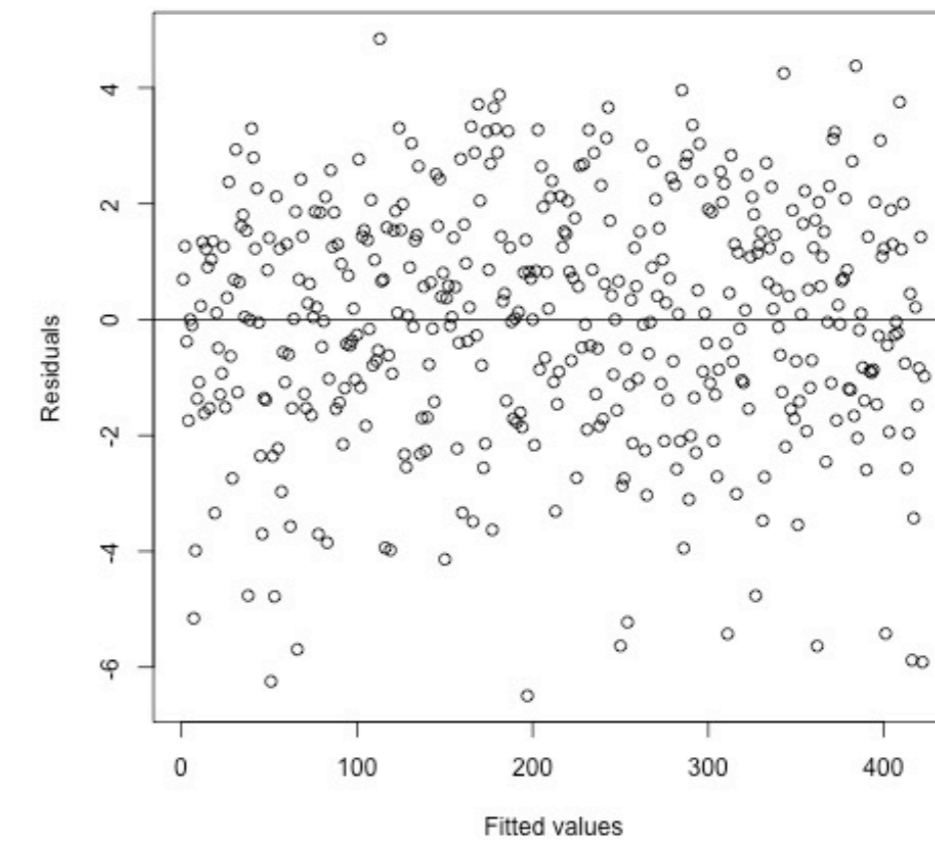

Supplement: bmjopen-2020-048157supp003.pdf [file bmjopen-2020-048157supp003.pdf]
